# Supplementary material
Source: publisher figshare collection journal article supplement (https://future-science-group.figshare.com/articles/dataset/_/20653089)
Supplement: Supplementary file 1 [file 1]

## Sheet: Drug list
Drug Name
voclosporin
viloxazine
vericiguat
trypan blue
tivozanib
sodium chloride
relugolix
potassium iodide
potassium chloride
ponesimod
methylene blue
magnesium sulfate
magnesium oxide
lonafarnib
lithium carbonate
gentian violet
evans blue
estetrol
calcium chloride
calcium carbonate
zonisamide
zolpidem
zolmitriptan
zoledronic acid
ziprasidone
zinc sulfate
zinc oxide
zinc chloride
zinc acetate
zileuton
zidovudine
ziconotide
zanamivir
zaleplon
zalcitabine
zafirlukast
xylose
warfarin
voxilaprevir
voxelotor
vortioxetine
vorinostat
voriconazole
vorapaxar
vitamin k
vitamin e
vitamin a
viomycin
vinorelbine
vincristine
vinblastine
vilazodone hydrochloride
vilanterol
vigabatrin
vidarabine
verteporfin
verapamil
venlafaxine hydrochloride
venetoclax
vemurafenib
velpatasvir
vedolizumab
vecuronium bromide
varenicline
vancomycin
valsartan
valrubicin
valproic acid
valganciclovir
valdecoxib
valbenazine
valacyclovir
vaborbactam
ustekinumab
urofollitropin
uridine
uracil
ulipristal
ubrogepant
tyrosine
tyropanoate
tyloxapol
tubocurarine
trovafloxacin
trospium chloride
tropicamide
tromethamine
troleandomycin
troglitazone
triptorelin pamoate
triprolidine
tripelennamine
trioxsalen
trimipramine
trimetrexate
trimethoprim
trimethobenzamide
trimethaphan
trimethadione
trimeprazine
trilostane
trihexyphenidyl
triheptanoin
trifluridine
triflupromazine
trifluoperazine
trientine
tridihexethyl
triclosan
triclofos
triclabendazole
trichlormethiazide
triazolam
triamterene
triamcinolone
tretinoin
treprostinil
trazodone
travoprost
trastuzumab
tranylcypromine
tranexamic acid
trandolapril
trametinib
tramadol
trabectedin
torsemide
toremifene
topotecan
topiramate
tolvaptan
tolterodine tartrate
tolmetin
tolcapone
tolbutamide
tolazoline
tolazamide
tofacitinib
tocilizumab
tocainide
tobramycin
tizanidine
titanium dioxide
tirofiban
tipranavir
tipiracil
tiotropium bromide
tiopronin
tioconazole
tinzaparin
tinidazole
timolol
tigecycline
ticlopidine
ticarcillin
ticagrelor
tiagabine
thyrotropin
thonzonium bromide
thiothixene
thiotepa
thioridazine
thiopental
thioguanine
thiethylperazine
thiamylal
thiamine
thiabendazole
theophylline
thalidomide
tetrahydrozoline
tetracycline
tetracaine
tetrabenazine
testosterone
testolactone
tesamorelin
teriparatide
teriflunomide
terconazole
terbutaline
terbinafine
terazosin
tenofovir
teniposide
tenecteplase
tenapanor
temsirolimus
temozolomide
temazepam
telotristat
telmisartan
telithromycin
telbivudine
telavancin
telaprevir
tegaserod
teduglutide
tazobactam
tazarotene
tavaborole
tasimelteon
tartaric acid
tapentadol
tamsulosin
tamoxifen
taliglucerase alfa
talbutal
talazoparib
tafluprost
tafenoquine
tafamidis
tadalafil
tacrolimus
tacrine
suvorexant
suprofen
sunitinib
sumatriptan
sulindac
sulfoxone
sulfisoxazole
sulfinpyrazone
sulfasalazine
sulfapyridine
sulfaphenazole
sulfanilamide
sulfamethoxazole
sulfamethizole
sulfameter
sulfamerazine
sulfadoxine
sulfadiazine
sulfacetamide
sulconazole
sulbactam
sugammadex
sufentanil
sucroferric oxyhydroxide
sucralfate
succinylcholine
succimer
streptozocin
streptomycin
stiripentol
stavudine
stanozolol
spironolactone
spirapril
spinosad
spectinomycin
sparfloxacin
sotalol
sorbitol
sorafenib
solifenacin succinate
sofosbuvir
sodium thiosulfate
sodium tetradecyl sulfate
sodium sulfate
sodium phosphate
sodium oxybate
sodium nitrite
sodium lactate
sodium fluoride
sodium citrate
sodium carbonate
sodium bicarbonate
sodium benzoate
sodium acetate
sitagliptin phosphate
sirolimus
sincalide
simvastatin
simethicone
simeprevir
silver sulfadiazine
silver
siltuximab
silodosin
sildenafil citrate
sibutramine
sevoflurane
sevelamer
sertraline
sertaconazole
sermorelin
semaglutide
selexipag
selenomethionine
selenious acid
selegiline
secukinumab
secretin
secobarbital
secnidazole
sebelipase alfa
scopolamine
saxagliptin
sarilumab
sargramostim
saralasin
saquinavir
sapropterin
salmeterol xinafoate
safinamide
rufinamide
rucaparib
rotigotine
rosuvastatin calcium
rosiglitazone
ropivacaine
ropinirole
romiplostim
romidepsin
roflumilast
rofecoxib
rocuronium
rizatriptan
rivastigmine
rivaroxaban
rituximab
ritonavir
ritodrine
risperidone
riociguat
rimexolone
rimantadine
riluzole
rilpivirine
rilonacept
rifaximin
rifapentine
rifampin
rifabutin
riboflavin
ribociclib
ribavirin
reteplase
retapamulin
reslizumab
reserpine
rescinnamine
repaglinide
remimazolam
remifentanil
regorafenib
regadenoson
raxibacumab
rasburicase
rasagiline
rapacuronium
ranolazine
ranitidine
ranibizumab
ramucirumab
ramipril
ramelteon
raltegravir potassium
raloxifene hydrochloride
rabeprazole
quinupristin
quinine
quinidine
quinethazone
quinestrol
quinapril
quetiapine fumarate
quazepam
pyrvinium
pyrithione
pyrimethamine
pyrilamine
pyridoxine
pyridostigmine bromide
pyrethrins
pyrazinamide
pseudoephedrine
prucalopride
protriptyline
protokylol
propylthiouracil
propyliodone
propranolol
propoxyphene napsylate
propoxycaine
propofol
propiomazine
propiolactone
propantheline
propafenone
promethazine
promazine
proguanil
progesterone
procyclidine
prochlorperazine
procarbazine
procaine
procainamide
probucol
probenecid
primidone
primaquine
prilocaine
pregabalin
prednisone
prednisolone
prednicarbate
prazosin
praziquantel
prazepam
pravastatin
prasugrel hydrochloride
pramoxine
pramlintide
pramipexole
pralidoxime
povidone-iodine
potassium sulfate
potassium perchlorate
potassium citrate
potassium acetate
posaconazole
poractant alfa
ponatinib
pomalidomide
polythiazide
polyestradiol
polidocanol
plicamycin
plecanatide
pitavastatin
piroxicam
pirfenidone
pirbuterol
pipobroman
piperonyl butoxide
piperazine
piperacillin
piperacetazine
pipecuronium
pioglitazone
pindolol
pinacidil
pimozide
pimecrolimus
pimavanserin
pilocarpine
pibrentasvir
phosphoric acid
phenytoin
phenylpropanolamine
phenylephrine
phenylbutazone
phentolamine
phentermine
phensuximide
phenprocoumon
phenoxybenzamine
phenmetrazine
pheniramine
phenindione
phenelzine
phendimetrazine
phenazopyridine
phenacemide
pertuzumab
perphenazine
permethrin
perindopril
pergolide
perflutren
perflubron
perflexane
perampanel
peramivir
pentoxifylline
pentostatin
pentolinium tartrate
pentobarbital
pentazocine
pentamidine
pentagastrin
penicillin v
penicillin g procaine
penicillin g benzathine
penicillamine
penciclovir
penbutolol
pemoline
pemirolast
pemetrexed
pembrolizumab
pegvisomant
pegloticase
peginterferon beta-1a
peginterferon alfa-2b
peginterferon alfa-2a
peginesatide
pegfilgrastim
pegaspargase
pegaptanib
pegademase bovine
pazopanib
patisiran
patiromer
pasireotide
paroxetine
paromomycin
paricalcitol
pargyline
parathyroid hormone
paramethasone
paramethadione
pantothenic acid
pantoprazole
panobinostat
panitumumab
pancuronium
pancrelipase
pamidronate
palonosetron
palivizumab
paliperidone palmitate
palbociclib
paclitaxel
ozenoxacin
ozanimod
oxytocin
oxytetracycline
oxyphenonium
oxyphencyclimine
oxyphenbutazone
oxymorphone
oxymetholone
oxymetazoline
oxycodone
oxybutynin
oxybenzone
oxprenolol
oxiconazole
oxcarbazepine
oxazepam
oxaprozin
oxandrolone
oxamniquine
oxaliplatin
oxacillin
ospemifene
osimertinib
oseltamivir
orphenadrine
orlistat
oritavancin
opicapone
ondansetron
omeprazole
omalizumab
omadacycline
olsalazine
olopatadine hydrochloride
olodaterol
olmesartan
olaratumab
olaparib
olanzapine
ofloxacin
ofatumumab
octreotide
octocrylene
ocrelizumab
obinutuzumab
obiltoxaximab
obeticholic acid
nystatin
nusinersen
novobiocin
nortriptyline
norgestrel
norgestimate
norfloxacin
norethynodrel
norethindrone
norepinephrine
norelgestromin
nizatidine
nivolumab
nitroglycerin
nitrofurazone
nitrofurantoin
nitisinone
nitazoxanide
nisoldipine
niraparib
nintedanib
nimodipine
nilutamide
nifurtimox
nifedipine
nicotine
niclosamide
nicardipine
niacinamide
niacin
nevirapine
netupitant
netilmicin
nepafenac
neostigmine
neomycin
nelfinavir
nelarabine
nefazodone
nedocromil
necitumumab
nebivolol
nateglinide
natamycin
natalizumab
naratriptan
naproxen
naphazoline
nandrolone
naltrexone
naloxone
naloxegol
nalmefene
nalidixic acid
naldemedine
nalbuphine
naftifine
nafcillin
nafarelin
nadolol
nabumetone
nabilone
mycophenolic acid
mupirocin
moxifloxacin
moxalactam
morphine
moricizine
montelukast
monobenzone
mometasone furoate
molindone
moexipril
modafinil
mivacurium
mitoxantrone
mitotane
mitomycin
misoprostol
mirtazapine
mirabegron
mipomersen
minoxidil
minocycline
miltefosine
milrinone
milnacipran
miglustat
miglitol
migalastat
mifepristone
midostaurin
midodrine
midazolam
miconazole
micafungin
mezlocillin
mexiletine
metyrapone
metronidazole
metrizoic acid
metrizamide
metreleptin
metoprolol
metolazone
metocurine
metoclopramide
metipranolol
methysergide
methyprylon
methyltestosterone
methylprednisolone
methylphenidate
methylnaltrexone
methylergonovine
methyldopa
methyl salicylate
methyclothiazide
methsuximide
methoxyflurane
methoxsalen
methoxamine
methotrexate
methohexital
methocarbamol
methixene
methimazole
methicillin
methenamine
methdilazine
methazolamide
metharbital
methantheline
methamphetamine
methadone
methacycline
methacholine chloride
metformin
metaxalone
metaraminol
metaproterenol
mestranol
mesoridazine
mesna
mesalamine
mersalyl
meropenem
mercaptopurine
mequinol
meprobamate
meprednisone
mepolizumab
mepivacaine
mephenytoin
mephentermine
meperidine
menthol
menotropins
menadiol
memantine
melphalan
meloxicam
meglumine
megestrol
mefloquine
mefenamic acid
medrysone
medroxyprogesterone
meclocycline
meclizine
mechlorethamine
mecasermin
mecamylamine
mebendazole
mazindol
masoprocol
maraviroc
maprotiline
mannitol
manganese sulfate
manganese chloride
malathion
magnesium trisilicate
magnesium hydroxide
magnesium chloride
magnesium carbonate
mafenide
macitentan
macimorelin
lypressin
lutetium
lusutrombopag
lurasidone hydrochloride
lumefantrine
lumacaftor
luliconazole
lucinactant
lubiprostone
loxapine
lovastatin
loteprednol etabonate
losartan
lorcaserin
lorazepam
loratadine
loracarbef
lopinavir
loperamide
lomustine
lomefloxacin
lofexidine
lodoxamide tromethamine
lixisenatide
lithium citrate
lisinopril
lisdexamfetamine dimesylate
liraglutide
lipase
linezolid
lincomycin
linagliptin
linaclotide
lifitegrast
lidocaine
levorphanol
levopropoxyphene
levonorgestrel
levomefolate calcium
levoleucovorin
levofloxacin
levodopa
levocetirizine
levocabastine
levobupivacaine
levobunolol
levetiracetam
levamlodipine
levamisole
levallorphan
levalbuterol
leuprolide
leucovorin
letrozole
lesinurad
lenvatinib
lenalidomide
leflunomide
ledipasvir
latanoprost
lapyrium
lapatinib
lanthanum carbonate
lanthanum
lansoprazole
lanreotide
lamotrigine
lamivudine
lactulose
lactitol
lactic acid
lacosamide
labetalol
ketotifen
ketorolac
ketoprofen
ketoconazole
ketamine
kanamycin
ixekizumab
ixazomib
ixabepilone
ivosidenib
ivermectin
ivacaftor
ivabradine
itraconazole
istradefylline
isradipine
isotretinoin
isosorbide
isoproterenol
isopropamide iodide
isoniazid
isoflurophate
isoflurane
isoetharine
isocarboxazid
irinotecan
irbesartan
ipratropium
ipodate
ipilimumab
ioxilan
ioversol
iotrolan
iothalamate meglumine
iopromide
iophendylate
iopanoic acid
iopamidol
iohexol
ioflupane
iofetamine
iodixanol
iodipamide
iodine
iodamide
iocetamic acid
invert sugar
inulin
interferon gamma-1b
interferon beta-1b
interferon beta-1a
interferon alfa-n3
insulin
inotuzumab ozogamicin
ingenol
infliximab
indomethacin
indocyanine green
indinavir
indecainide
indapamide
indacaterol
incobotulinumtoxina
imiquimod
imipramine
imipenem
imiglucerase
imciromab pentetate
imatinib mesylate
iloprost
iloperidone
ifosfamide
idursulfase
idoxuridine
idelalisib
idarucizumab
idarubicin
icodextrin
icatibant
ibutilide
ibuprofen
ibritumomab tiuxetan
hydroxyzine
hydroxyurea
hydroxystilbamidine
hydroxychloroquine
hydroxocobalamin
hydroquinone
hydromorphone
hydroflumethiazide
hydrocortisone
hydrocodone
hydrochlorothiazide
hydralazine
homatropine
histrelin
histamine
hexylcaine
hexocyclium
hexafluorenium
hexachlorophene
hetacillin
heparin
halothane
haloprogin
haloperidol
halofantrine
halobetasol
halcinonide
halazepam
guselkumab
guanidine
guanfacine
guanethidine
guanadrel
guanabenz
guaifenesin
grepafloxacin
granisetron
gramicidin
goserelin
golimumab
glycopyrrolate
glycine
glycerol
glyburide
glutethimide
glutathione
glucagon
glipizide
glimepiride
glatiramer acetate
gilteritinib
gemtuzumab
gemifloxacin
gemfibrozil
gemcitabine
gefitinib
gatifloxacin
ganirelix
ganciclovir
galsulfase
gallium nitrate
gallamine triethiodide
galantamine
gadoversetamide
gadoteridol
gadoterate meglumine
gadofosveset trisodium
gadodiamide
gadobutrol
gabapentin
furosemide
furazolidone
fulvestrant
frovatriptan
fostamatinib
fospropofol
fosphenytoin
fosinopril
fosfomycin
foscarnet
fosaprepitant
fosamprenavir
formoterol fumarate
fondaparinux
fomivirsen
fomepizole
folic acid
fluvoxamine
fluvastatin
fluticasone
flutemetamol
flutamide
flurbiprofen
flurazepam
fluprednisolone
fluphenazine
fluoxymesterone
fluoxetine
fluorouracil
fluorometholone
fluorescein
fluocinonide
fluocinolone
flunisolide
flumethasone
flumazenil
fludrocortisone
fludarabine
flucytosine
fluconazole
fluciclovine f-18
floxuridine
florbetapir
flibanserin
flecainide
flavoxate
fingolimod hydrochloride
finasteride
finafloxacin
filgrastim
fidaxomicin
fibrinolysin
fexofenadine
fesoterodine
ferumoxsil
ferumoxides
ferrous sulfate
ferrous fumarate
ferric maltol
ferric citrate
ferric carboxymaltose
ferric ammonium citrate
fentanyl
fenoprofen
fenoldopam
fenofibric acid
fenofibrate
fenfluramine
felodipine
felbamate
febuxostat
famotidine
famciclovir
ezogabine
ezetimibe
exenatide
exemestane
evolocumab
everolimus
etretinate
etravirine
etoposide
etonogestrel
etomidate
etodolac
etidocaine
ethynodiol
ethylestrenol
ethoxzolamide
ethotoin
ethosuximide
ethionamide
ethinyl estradiol
ethinamate
ethchlorvynol
ethanolamine
ethambutol
ethacrynic acid
eteplirsen
etanercept
eszopiclone
estropipate
estrone
estrogens, conjugated synthetic b
estrogens, conjugated synthetic a
estramustine
estradiol
estazolam
esomeprazole
esmolol
eslicarbazepine
erythromycin
ertapenem
erlotinib hydrochloride
eribulin
ergotamine
ergoloid mesylates
eptifibatide
eprosartan
epoprostenol
epoetin alfa
eplerenone
epirubicin
epinephrine
epinastine
ephedrine
entrectinib
entecavir
entacapone
enoxaparin
enoxacin
enfuvirtide
enflurane
encorafenib
enalaprilat
enalapril
emtricitabine
empagliflozin
emicizumab
emedastine
eluxadoline
eltrombopag
elotuzumab
eliglustat
eletriptan
elagolix
eflornithine
efinaconazole
efavirenz
edrophonium
edoxaban
edaravone
eculizumab
econazole
echothiophate iodide
ecallantide
dyphylline
dydrogesterone
dyclonine
dutasteride
durvalumab
duloxetine hydrochloride
dulaglutide
droxidopa
drospirenone
droperidol
dronedarone
dronabinol
dromostanolone
doxylamine
doxycycline
doxorubicin
doxepin
doxazosin
doxapram
doxacurium
dorzolamide
dornase alfa
doripenem
doravirine
dopamine
donepezil
dolutegravir
dolasetron
dofetilide
docosanol
docetaxel
dobutamine
disulfiram
disopyramide
dirithromycin
dipyridamole
dipivefrin
diphenylpyraline
diphenoxylate
diphenidol
diphenhydramine
diphemanil methylsulfate
dinoprostone
dinoprost
dimethyl sulfoxide
dimethyl fumarate
dimercaprol
dimenhydrinate
diltiazem
dihydroergotamine
dihydrocodeine
digoxin
digitoxin
difluprednate
diflunisal
diflorasone
difenoxin
diethylstilbestrol
diethylpropion
diethylcarbamazine
dienogest
dienestrol
didanosine
dicyclomine
dicumarol
dicloxacillin
diclofenac
dichlorphenamide
dibucaine
diazoxide
diazepam
diatrizoate
dezocine
dextrothyroxine
dextromethorphan
dextroamphetamine
dexrazoxane
dexpanthenol
dexmethylphenidate hydrochloride
dexmedetomidine
dexlansoprazole
dexchlorpheniramine
dexbrompheniramine
dexamethasone
deutetrabenazine
desvenlafaxine succinate
desoxycorticosterone
desoximetasone
desonide
desogestrel
desloratadine
deslanoside
desirudin
desipramine
desflurane
deserpidine
deoxycholic acid
denosumab
denileukin diftitox
demeclocycline
demecarium
delavirdine
delafloxacin
deflazacort
defibrotide
deferoxamine
deferiprone
deferasirox
decitabine
decamethonium
daunorubicin
dasatinib
darunavir
darolutamide
darifenacin
darbepoetin alfa
daratumumab
daptomycin
dapsone
dapiprazole
dantrolene
danazol
danaparoid
dalteparin
dalfopristin
dalbavancin
dactinomycin
daclizumab
dacarbazine
dabrafenib
dabigatran
cytarabine
cysteine
cysteamine
cyproheptadine
cycrimine
cyclothiazide
cyclosporine
cycloserine
cyclophosphamide
cyclopentolate
cyclobenzaprine
cyclizine
cyclacillin
cupric chloride
crotamiton
cromolyn sodium
crofelemer
crizotinib
cosyntropin
cortisone
conivaptan
colistin
colfosceril palmitate
colestipol
colesevelam hydrochloride
colchicine
codeine
cocaine
cobicistat
clozapine
cloxacillin
clotrimazole
clorazepate dipotassium
clopidogrel
clonidine
clonazepam
clomipramine
clomiphene
clofibrate
clofazimine
clofarabine
clocortolone pivalate
clobetasol
clobazam
clioquinol
clindamycin
clidinium
clevidipine
clemastine
clarithromycin
cladribine
citric acid
citalopram
cisplatin
cisatracurium
cisapride
ciprofloxacin
cinoxacin
cinacalcet
cimetidine
cilostazol
cilastatin
cidofovir
ciclopirox
ciclesonide
chymopapain
chromic chloride
choline
cholic acid
cholecalciferol
chlorzoxazone
chlorthalidone
chlortetracycline
chlorprothixene
chlorpropamide
chlorpromazine
chlorphentermine
chlorpheniramine
chlorphenesin
chloroxine
chlorotrianisene
chlorothiazide
chloroquine
chloroprocaine
chlormezanone
chlormerodrin
chlorhexidine
chlordiazepoxide
chloramphenicol
chlorambucil
cevimeline
cetyl alcohol
cetuximab
cetrorelix
cetirizine
ceruletide
certolizumab pegol
cerliponase alfa
cerivastatin
ceritinib
cephradine
cephapirin
cephalothin
cephaloglycin
cephalexin
celecoxib
cefuroxime
ceftriaxone
ceftolozane
ceftizoxime
ceftibuten
ceftazidime
ceftaroline fosamil
cefprozil
cefpodoxime
cefpiramide
cefoxitin
cefotiam
cefotetan
cefotaxime
ceforanide
cefoperazone
cefonicid
cefmetazole
cefmenoxime
cefixime
cefiderocol
cefepime
cefditoren
cefdinir
cefazolin
cefamandole
cefaclor
caspofungin
carvedilol
carteolol
carprofen
carmustine
carisoprodol
cariprazine
carglumic acid
carfilzomib
carboprost
carboplatin
carbinoxamine
carbidopa
carbenicillin
carbamazepine
carbachol
captopril
capsaicin
capromab pendetide
capreomycin
capmatinib
capecitabine
cannabidiol
cangrelor
candicidin
candesartan
canakinumab
canagliflozin
calfactant
calcium gluconate
calcium acetate
calcium
calcitriol
calcitonin
calcipotriene
calcifediol
caffeine
cabozantinib
cabergoline
cabazitaxel
butorphanol
butoconazole
butenafine
butalbital
busulfan
buspirone
bupropion
buprenorphine
bupivacaine
bumetanide
budesonide
buclizine
brompheniramine
bromodiphenhydramine
bromocriptine
bromfenac
brodalumab
brivaracetam
brinzolamide
brimonidine tartrate
brexpiprazole
brexanolone
bretylium
brentuximab vedotin
bremelanotide
bosutinib
bosentan
bortezomib
blinatumomab
bleomycin
bivalirudin
bitolterol
bisoprolol
bismuth subsalicylate
bisacodyl
biperiden
biotin
bimatoprost
bictegravir
bicalutamide
bezlotoxumab
bexarotene
bevacizumab
betrixaban
bethanidine
bethanechol
betazole
betaxolol
betamethasone
betaine
beta carotene
besifloxacin
beractant
bepridil
bepotastine
benzyl benzoate
benzyl alcohol
benztropine
benzquinamide
benzphetamine
benzoyl peroxide
benzonatate
bentoquatam
bentiromide
benralizumab
benoxinate
bendroflumethiazide
bendamustine hydrochloride
benazepril
belinostat
belimumab
bedaquiline
beclomethasone
becaplermin
bazedoxifene
basiliximab
barium sulfate
baricitinib
balsalazide
baloxavir
baclofen
bacitracin
bacampicillin
aztreonam
azlocillin
azithromycin
azilsartan
azelastine
azelaic acid
azathioprine
azatadine
azacitidine
axitinib
avobenzone
avibactam
avelumab
avanafil
auranofin
atropine
atracurium
atovaquone
atorvastatin
atomoxetine hydrochloride
atezolizumab
atenolol
atazanavir sulfate
aspirin
asparaginase
asfotase alfa
asenapine
ascorbic acid
artesunate
artemether
arsenic trioxide
aripiprazole
arginine
argatroban
ardeparin
arbutamine
aprotinin
aprepitant
apremilast
apraclonidine
apomorphine
apixaban
apalutamide
antazoline
anisindione
anileridine
anidulafungin
anastrozole
anagrelide
amprenavir
ampicillin
amphotericin b
amphetamine
amoxicillin
amoxapine
amodiaquine
amlodipine
amlexanox
amitriptyline
amisulpride
amiodarone
aminosalicylic acid
aminophylline
aminoglutethimide
aminocaproic acid
amiloride
amikacin
amifostine
amifampridine
amdinocillin
amcinonide
ambrisentan
ambenonium chloride
amantadine
alvimopan
aluminum
altretamine
alprostadil
alprazolam
alpha-tocopherol
alosetron
alogliptin
almotriptan
allopurinol
alitretinoin
aliskiren
alirocumab
alfuzosin
alfentanil
alendronate
alemtuzumab
aldesleukin
alclometasone dipropionate
alcaftadine
albuterol
albendazole
alatrofloxacin
agalsidase beta
aflibercept
afatinib
afamelanotide
ado-trastuzumab emtansine
adenosine
adefovir
adapalene
adalimumab
acyclovir
acrivastine
aclidinium bromide
acitretin
acetylcysteine
acetylcholine
acetophenazine
acetohydroxamic acid
acetohexamide
acetazolamide
acetaminophen
acebutolol
acarbose
acamprosate
acalabrutinib
abobotulinumtoxina
abiraterone
abciximab
abatacept
abarelix
abaloparatide
abacavir
ammonium chloride
cellulose
ethiodized oil
olive oil
polyethylene
polytetrafluoroethylene
safflower oil
soybean oil
urea

## Sheet: Relevant ATC Classes
ATC Classes which frequently occur in our clustering results	Number of drugs present in them	Number of drugs matched with our drug list
Blood Glucose Lowering Drugs (A10B)	53	25
Dermatologicals/Corticosteroids/Corticosteroids (D07A)	38	16
Antimalarials (P01B)	16	12
Antiinflammatory and Antirheumatic products, Non steroids (M01A)	71	21
Analgesics >> Opioids (N02A)	26	12
Antibacterials for Systemic Use (J01)	227	106
Antineoplastic Agents (L01)	267	132
Direct Acting Antivirals (J05A)	85	41
Drugs for Obstructive Airway Diseases (R03)	82	23
Anti-Parkinson Drugs (N04)	34	19
Psychoanaleptics (N06)	109	34
Antithrombotic Agents (B01)	72	32
Lipid modifying agents, Plain (C10A)	46	17
Antipsychotics (N05A)	68	27
Beta-blocking agents (C07A)	30	17
Antiemetics and Antinauseants (A04A)	14	8
Contrast Media (V08)	57	20
Antiepileptics (N03A)	48	32
Diuretics (C03)	41	19
Anesthetics (N01)	48	28
Anthelmintics (P02)	25	10
Antihypertensives (C02)	44	17
Sex hormones and modulators of the genital system (G03)	76	22
Drugs for Acid Related Disorder (A02)	51	16
Calcium Channel Blockers (C08)	25	12
Agents Acting on the Renin-Angiotensin System (C09)	28	18
	1681	736

## Sheet: ATC based Gold Standard
Drug Name	ATC Code	ATC Classification
acarbose	A10BF01	Blood Glucose Lowering Drugs (A10B)
acetohexamide	A10BB31	Blood Glucose Lowering Drugs (A10B)
chlorpropamide	A10BB02	Blood Glucose Lowering Drugs (A10B)
exenatide	A10BJ01	Blood Glucose Lowering Drugs (A10B)
glimepiride	A10BB12	Blood Glucose Lowering Drugs (A10B)
glipizide	A10BB07	Blood Glucose Lowering Drugs (A10B)
liraglutide	A10BJ02	Blood Glucose Lowering Drugs (A10B)
metformin	A10BA02	Blood Glucose Lowering Drugs (A10B)
miglitol	A10BF02	Blood Glucose Lowering Drugs (A10B)
nateglinide	A10BX03	Blood Glucose Lowering Drugs (A10B)
pioglitazone	A10BG03	Blood Glucose Lowering Drugs (A10B)
pramlintide	A10BX05	Blood Glucose Lowering Drugs (A10B)
repaglinide	A10BX02	Blood Glucose Lowering Drugs (A10B)
rosiglitazone	A10BG02	Blood Glucose Lowering Drugs (A10B)
saxagliptin	A10BH03	Blood Glucose Lowering Drugs (A10B)
tolazamide	A10BB05	Blood Glucose Lowering Drugs (A10B)
tolbutamide	A10BB03	Blood Glucose Lowering Drugs (A10B)
troglitazone	A10BG01	Blood Glucose Lowering Drugs (A10B)
alogliptin	A10BH04	Blood Glucose Lowering Drugs (A10B)
linagliptin	A10BH05	Blood Glucose Lowering Drugs (A10B)
lixisenatide	A10BJ03	Blood Glucose Lowering Drugs (A10B)
dulaglutide	A10BJ05	Blood Glucose Lowering Drugs (A10B)
semaglutide	A10BJ06	Blood Glucose Lowering Drugs (A10B)
canagliflozin	A10BK02	Blood Glucose Lowering Drugs (A10B)
empagliflozin	A10BK03	Blood Glucose Lowering Drugs (A10B)
amcinonide	D07AC11	Dermatologicals/Corticosteroids/Corticosteroids (D07A)
betamethasone	D07AC01	Dermatologicals/Corticosteroids/Corticosteroids (D07A)
clobetasol	D07AD01	Dermatologicals/Corticosteroids/Corticosteroids (D07A)
desonide	D07AC09	Dermatologicals/Corticosteroids/Corticosteroids (D07A)
desoximetasone	D07AC03	Dermatologicals/Corticosteroids/Corticosteroids (D07A)
diflorasone	D07AC10	Dermatologicals/Corticosteroids/Corticosteroids (D07A)
fluocinonide	D07AC08	Dermatologicals/Corticosteroids/Corticosteroids (D07A)
halcinonide	D07AD02	Dermatologicals/Corticosteroids/Corticosteroids (D07A)
hydrocortisone	D07AA02	Dermatologicals/Corticosteroids/Corticosteroids (D07A)
dexamethasone	D07AB19	Dermatologicals/Corticosteroids/Corticosteroids (D07A)
prednicarbate	D07AC18	Dermatologicals/Corticosteroids/Corticosteroids (D07A)
methylprednisolone	D07AA01	Dermatologicals/Corticosteroids/Corticosteroids (D07A)
prednisolone	D07AA03	Dermatologicals/Corticosteroids/Corticosteroids (D07A)
fluorometholone	D07AB06	Dermatologicals/Corticosteroids/Corticosteroids (D07A)
triamcinolone	D07AB09	Dermatologicals/Corticosteroids/Corticosteroids (D07A)
difluprednate	D07AC19	Dermatologicals/Corticosteroids/Corticosteroids (D07A)
amodiaquine	P01BA06	Antimalarials (P01B)
artemether	P01BE02	Antimalarials (P01B)
halofantrine	P01BX01	Antimalarials (P01B)
mefloquine	P01BC02	Antimalarials (P01B)
primaquine	P01BA03	Antimalarials (P01B)
proguanil	P01BB01	Antimalarials (P01B)
pyrimethamine	P01BD01	Antimalarials (P01B)
hydroxychloroquine	P01BA02	Antimalarials (P01B)
artesunate	P01BE03	Antimalarials (P01B)
quinine	P01BC01	Antimalarials (P01B)
chloroquine	P01BA01	Antimalarials (P01B)
tafenoquine	P01BA07	Antimalarials (P01B)
celecoxib	M01AH01	Antiinflammatory and Antirheumatic products, Non steroids (M01A)
diclofenac	M01AB05	Antiinflammatory and Antirheumatic products, Non steroids (M01A)
etodolac	M01AB08	Antiinflammatory and Antirheumatic products, Non steroids (M01A)
fenoprofen	M01AE04	Antiinflammatory and Antirheumatic products, Non steroids (M01A)
flurbiprofen	M01AE09	Antiinflammatory and Antirheumatic products, Non steroids (M01A)
ibuprofen	M01AE01	Antiinflammatory and Antirheumatic products, Non steroids (M01A)
ketoprofen	M01AE03	Antiinflammatory and Antirheumatic products, Non steroids (M01A)
ketorolac	M01AB15	Antiinflammatory and Antirheumatic products, Non steroids (M01A)
mefenamic acid	M01AG01	Antiinflammatory and Antirheumatic products, Non steroids (M01A)
meloxicam	M01AC06	Antiinflammatory and Antirheumatic products, Non steroids (M01A)
nabumetone	M01AX01	Antiinflammatory and Antirheumatic products, Non steroids (M01A)
naproxen	M01AE02	Antiinflammatory and Antirheumatic products, Non steroids (M01A)
oxaprozin	M01AE12	Antiinflammatory and Antirheumatic products, Non steroids (M01A)
phenylbutazone	M01AA01	Antiinflammatory and Antirheumatic products, Non steroids (M01A)
piroxicam	M01AC01	Antiinflammatory and Antirheumatic products, Non steroids (M01A)
rofecoxib	M01AH02	Antiinflammatory and Antirheumatic products, Non steroids (M01A)
suprofen	M01AE07	Antiinflammatory and Antirheumatic products, Non steroids (M01A)
tolmetin	M01AB03	Antiinflammatory and Antirheumatic products, Non steroids (M01A)
valdecoxib	M01AH03	Antiinflammatory and Antirheumatic products, Non steroids (M01A)
oxyphenbutazone	M01AA03	Antiinflammatory and Antirheumatic products, Non steroids (M01A)
sulindac	M01AB02	Antiinflammatory and Antirheumatic products, Non steroids (M01A)
butorphanol	N02AF01	Analgesics >> Opioids (N02A)
dezocine	N02AX03	Analgesics >> Opioids (N02A)
dihydrocodeine	N02AA08	Analgesics >> Opioids (N02A)
hydromorphone	N02AA03	Analgesics >> Opioids (N02A)
morphine	N02AA01	Analgesics >> Opioids (N02A)
nalbuphine	N02AF02	Analgesics >> Opioids (N02A)
oxymorphone	N02AA11	Analgesics >> Opioids (N02A)
pentazocine	N02AD01	Analgesics >> Opioids (N02A)
tramadol	N02AX02	Analgesics >> Opioids (N02A)
oxycodone	N02AA05	Analgesics >> Opioids (N02A)
buprenorphine	N02AE01	Analgesics >> Opioids (N02A)
tapentadol	N02AX06	Analgesics >> Opioids (N02A)
amikacin	J01GB06	Antibacterials for Systemic Use (J01)
amoxicillin	J01CA04	Antibacterials for Systemic Use (J01)
ampicillin	J01CA01	Antibacterials for Systemic Use (J01)
azithromycin	J01FA10	Antibacterials for Systemic Use (J01)
azlocillin	J01CA09	Antibacterials for Systemic Use (J01)
aztreonam	J01DF01	Antibacterials for Systemic Use (J01)
carbenicillin	J01CA03	Antibacterials for Systemic Use (J01)
cefaclor	J01DC04	Antibacterials for Systemic Use (J01)
cefamandole	J01DC03	Antibacterials for Systemic Use (J01)
cefazolin	J01DB04	Antibacterials for Systemic Use (J01)
cefepime	J01DE01	Antibacterials for Systemic Use (J01)
cefmenoxime	J01DD05	Antibacterials for Systemic Use (J01)
cefmetazole	J01DC09	Antibacterials for Systemic Use (J01)
cefoperazone	J01DD12	Antibacterials for Systemic Use (J01)
cefotaxime	J01DD01	Antibacterials for Systemic Use (J01)
cefotetan	J01DC05	Antibacterials for Systemic Use (J01)
cefoxitin	J01DC01	Antibacterials for Systemic Use (J01)
ceftazidime	J01DD02	Antibacterials for Systemic Use (J01)
ceftizoxime	J01DD07	Antibacterials for Systemic Use (J01)
ceftriaxone	J01DD04	Antibacterials for Systemic Use (J01)
cefuroxime	J01DC02	Antibacterials for Systemic Use (J01)
ciprofloxacin	J01MA02	Antibacterials for Systemic Use (J01)
clarithromycin	J01FA09	Antibacterials for Systemic Use (J01)
clindamycin	J01FF01	Antibacterials for Systemic Use (J01)
cloxacillin	J01CF02	Antibacterials for Systemic Use (J01)
colistin	J01XB01	Antibacterials for Systemic Use (J01)
dicloxacillin	J01CF01	Antibacterials for Systemic Use (J01)
fosfomycin	J01XX01	Antibacterials for Systemic Use (J01)
meropenem	J01DH02	Antibacterials for Systemic Use (J01)
mezlocillin	J01CA10	Antibacterials for Systemic Use (J01)
nafcillin	J01CF06	Antibacterials for Systemic Use (J01)
netilmicin	J01GB07	Antibacterials for Systemic Use (J01)
ofloxacin	J01MA01	Antibacterials for Systemic Use (J01)
oxacillin	J01CF04	Antibacterials for Systemic Use (J01)
piperacillin	J01CA12	Antibacterials for Systemic Use (J01)
sulbactam	J01CG01	Antibacterials for Systemic Use (J01)
tazobactam	J01CG02	Antibacterials for Systemic Use (J01)
ticarcillin	J01CA13	Antibacterials for Systemic Use (J01)
vancomycin	J01XA01	Antibacterials for Systemic Use (J01)
demeclocycline	J01AA01	Antibacterials for Systemic Use (J01)
doxycycline	J01AA02	Antibacterials for Systemic Use (J01)
chlortetracycline	J01AA03	Antibacterials for Systemic Use (J01)
oxytetracycline	J01AA06	Antibacterials for Systemic Use (J01)
tetracycline	J01AA07	Antibacterials for Systemic Use (J01)
minocycline	J01AA08	Antibacterials for Systemic Use (J01)
tigecycline	J01AA12	Antibacterials for Systemic Use (J01)
omadacycline	J01AA15	Antibacterials for Systemic Use (J01)
chloramphenicol	J01BA01	Antibacterials for Systemic Use (J01)
bacampicillin	J01CA06	Antibacterials for Systemic Use (J01)
hetacillin	J01CA18	Antibacterials for Systemic Use (J01)
cefonicid	J01DC06	Antibacterials for Systemic Use (J01)
cefotiam	J01DC07	Antibacterials for Systemic Use (J01)
loracarbef	J01DC08	Antibacterials for Systemic Use (J01)
cefprozil	J01DC10	Antibacterials for Systemic Use (J01)
ceforanide	J01DC11	Antibacterials for Systemic Use (J01)
cefixime	J01DD08	Antibacterials for Systemic Use (J01)
cefpiramide	J01DD11	Antibacterials for Systemic Use (J01)
cefpodoxime	J01DD13	Antibacterials for Systemic Use (J01)
ceftibuten	J01DD14	Antibacterials for Systemic Use (J01)
cefdinir	J01DD15	Antibacterials for Systemic Use (J01)
cefditoren	J01DD16	Antibacterials for Systemic Use (J01)
ertapenem	J01DH03	Antibacterials for Systemic Use (J01)
doripenem	J01DH04	Antibacterials for Systemic Use (J01)
ceftaroline fosamil	J01DI02	Antibacterials for Systemic Use (J01)
cefiderocol	J01DI04	Antibacterials for Systemic Use (J01)
trimethoprim	J01EA01	Antibacterials for Systemic Use (J01)
sulfamethizole	J01EB02	Antibacterials for Systemic Use (J01)
sulfapyridine	J01EB04	Antibacterials for Systemic Use (J01)
sulfanilamide	J01EB06	Antibacterials for Systemic Use (J01)
sulfamethoxazole	J01EC01	Antibacterials for Systemic Use (J01)
sulfadiazine	J01EC02	Antibacterials for Systemic Use (J01)
sulfamerazine	J01ED07	Antibacterials for Systemic Use (J01)
sulfaphenazole	J01ED08	Antibacterials for Systemic Use (J01)
erythromycin	J01FA01	Antibacterials for Systemic Use (J01)
troleandomycin	J01FA08	Antibacterials for Systemic Use (J01)
dirithromycin	J01FA13	Antibacterials for Systemic Use (J01)
telithromycin	J01FA15	Antibacterials for Systemic Use (J01)
lincomycin	J01FF02	Antibacterials for Systemic Use (J01)
streptomycin	J01GA01	Antibacterials for Systemic Use (J01)
tobramycin	J01GB01	Antibacterials for Systemic Use (J01)
kanamycin	J01GB04	Antibacterials for Systemic Use (J01)
neomycin	J01GB05	Antibacterials for Systemic Use (J01)
enoxacin	J01MA04	Antibacterials for Systemic Use (J01)
norfloxacin	J01MA06	Antibacterials for Systemic Use (J01)
lomefloxacin	J01MA07	Antibacterials for Systemic Use (J01)
sparfloxacin	J01MA09	Antibacterials for Systemic Use (J01)
grepafloxacin	J01MA11	Antibacterials for Systemic Use (J01)
levofloxacin	J01MA12	Antibacterials for Systemic Use (J01)
trovafloxacin	J01MA13	Antibacterials for Systemic Use (J01)
moxifloxacin	J01MA14	Antibacterials for Systemic Use (J01)
gemifloxacin	J01MA15	Antibacterials for Systemic Use (J01)
gatifloxacin	J01MA16	Antibacterials for Systemic Use (J01)
delafloxacin	J01MA23	Antibacterials for Systemic Use (J01)
nalidixic acid	J01MB02	Antibacterials for Systemic Use (J01)
cinoxacin	J01MB06	Antibacterials for Systemic Use (J01)
telavancin	J01XA03	Antibacterials for Systemic Use (J01)
dalbavancin	J01XA04	Antibacterials for Systemic Use (J01)
oritavancin	J01XA05	Antibacterials for Systemic Use (J01)
metronidazole	J01XD01	Antibacterials for Systemic Use (J01)
tinidazole	J01XD02	Antibacterials for Systemic Use (J01)
nitrofurantoin	J01XE01	Antibacterials for Systemic Use (J01)
spectinomycin	J01XX04	Antibacterials for Systemic Use (J01)
methenamine	J01XX05	Antibacterials for Systemic Use (J01)
linezolid	J01XX08	Antibacterials for Systemic Use (J01)
daptomycin	J01XX09	Antibacterials for Systemic Use (J01)
bacitracin	J01XX10	Antibacterials for Systemic Use (J01)
altretamine	L01XX03	Antineoplastic Agents (L01)
asparaginase	L01XX02	Antineoplastic Agents (L01)
bleomycin	L01DC01	Antineoplastic Agents (L01)
busulfan	L01AB01	Antineoplastic Agents (L01)
capecitabine	L01BC06	Antineoplastic Agents (L01)
carboplatin	L01XA02	Antineoplastic Agents (L01)
chlorambucil	L01AA02	Antineoplastic Agents (L01)
cisplatin	L01XA01	Antineoplastic Agents (L01)
cladribine	L01BB04	Antineoplastic Agents (L01)
clofarabine	L01BB06	Antineoplastic Agents (L01)
cyclophosphamide	L01AA01	Antineoplastic Agents (L01)
cytarabine	L01BC01	Antineoplastic Agents (L01)
dacarbazine	L01AX04	Antineoplastic Agents (L01)
daunorubicin	L01DB02	Antineoplastic Agents (L01)
docetaxel	L01CD02	Antineoplastic Agents (L01)
doxorubicin	L01DB01	Antineoplastic Agents (L01)
epirubicin	L01DB03	Antineoplastic Agents (L01)
etoposide	L01CB01	Antineoplastic Agents (L01)
floxuridine	L01BC09	Antineoplastic Agents (L01)
fludarabine	L01BB05	Antineoplastic Agents (L01)
fluorouracil	L01BC02	Antineoplastic Agents (L01)
gemcitabine	L01BC05	Antineoplastic Agents (L01)
idarubicin	L01DB06	Antineoplastic Agents (L01)
ifosfamide	L01AA06	Antineoplastic Agents (L01)
inotuzumab ozogamicin	L01XC26	Antineoplastic Agents (L01)
irinotecan	L01CE02	Antineoplastic Agents (L01)
lomustine	L01AD02	Antineoplastic Agents (L01)
melphalan	L01AA03	Antineoplastic Agents (L01)
mercaptopurine	L01BB02	Antineoplastic Agents (L01)
mitomycin	L01DC03	Antineoplastic Agents (L01)
mitoxantrone	L01DB07	Antineoplastic Agents (L01)
nelarabine	L01BB07	Antineoplastic Agents (L01)
oxaliplatin	L01XA03	Antineoplastic Agents (L01)
pemetrexed	L01BA04	Antineoplastic Agents (L01)
procarbazine	L01XB01	Antineoplastic Agents (L01)
temozolomide	L01AX03	Antineoplastic Agents (L01)
teniposide	L01CB02	Antineoplastic Agents (L01)
thiotepa	L01AC01	Antineoplastic Agents (L01)
topotecan	L01CE01	Antineoplastic Agents (L01)
vinblastine	L01CA01	Antineoplastic Agents (L01)
vincristine	L01CA02	Antineoplastic Agents (L01)
carmustine	L01AD01	Antineoplastic Agents (L01)
streptozocin	L01AD04	Antineoplastic Agents (L01)
pipobroman	L01AX02	Antineoplastic Agents (L01)
methotrexate	L01BA01	Antineoplastic Agents (L01)
azacitidine	L01BC07	Antineoplastic Agents (L01)
decitabine	L01BC08	Antineoplastic Agents (L01)
vinorelbine	L01CA04	Antineoplastic Agents (L01)
paclitaxel	L01CD01	Antineoplastic Agents (L01)
cabazitaxel	L01CD04	Antineoplastic Agents (L01)
trabectedin	L01CX01	Antineoplastic Agents (L01)
dactinomycin	L01DA01	Antineoplastic Agents (L01)
valrubicin	L01DB09	Antineoplastic Agents (L01)
plicamycin	L01DC02	Antineoplastic Agents (L01)
ixabepilone	L01DC04	Antineoplastic Agents (L01)
dasatinib	L01EA02	Antineoplastic Agents (L01)
bosutinib	L01EA04	Antineoplastic Agents (L01)
ponatinib	L01EA05	Antineoplastic Agents (L01)
gefitinib	L01EB01	Antineoplastic Agents (L01)
afatinib	L01EB03	Antineoplastic Agents (L01)
osimertinib	L01EB04	Antineoplastic Agents (L01)
vemurafenib	L01EC01	Antineoplastic Agents (L01)
dabrafenib	L01EC02	Antineoplastic Agents (L01)
encorafenib	L01EC03	Antineoplastic Agents (L01)
crizotinib	L01ED01	Antineoplastic Agents (L01)
ceritinib	L01ED02	Antineoplastic Agents (L01)
trametinib	L01EE01	Antineoplastic Agents (L01)
palbociclib	L01EF01	Antineoplastic Agents (L01)
ribociclib	L01EF02	Antineoplastic Agents (L01)
temsirolimus	L01EG01	Antineoplastic Agents (L01)
everolimus	L01EG02	Antineoplastic Agents (L01)
lapatinib	L01EH01	Antineoplastic Agents (L01)
axitinib	L01EK01	Antineoplastic Agents (L01)
tivozanib	L01EK03	Antineoplastic Agents (L01)
acalabrutinib	L01EL02	Antineoplastic Agents (L01)
idelalisib	L01EM01	Antineoplastic Agents (L01)
sunitinib	L01EX01	Antineoplastic Agents (L01)
sorafenib	L01EX02	Antineoplastic Agents (L01)
pazopanib	L01EX03	Antineoplastic Agents (L01)
regorafenib	L01EX05	Antineoplastic Agents (L01)
cabozantinib	L01EX07	Antineoplastic Agents (L01)
lenvatinib	L01EX08	Antineoplastic Agents (L01)
nintedanib	L01EX09	Antineoplastic Agents (L01)
midostaurin	L01EX10	Antineoplastic Agents (L01)
gilteritinib	L01EX13	Antineoplastic Agents (L01)
entrectinib	L01EX14	Antineoplastic Agents (L01)
capmatinib	L01EX17	Antineoplastic Agents (L01)
rituximab	L01FA01	Antineoplastic Agents (L01)
ofatumumab	L01FA02	Antineoplastic Agents (L01)
daratumumab	L01FC01	Antineoplastic Agents (L01)
trastuzumab	L01FD01	Antineoplastic Agents (L01)
pertuzumab	L01FD02	Antineoplastic Agents (L01)
cetuximab	L01FE01	Antineoplastic Agents (L01)
panitumumab	L01FE02	Antineoplastic Agents (L01)
nivolumab	L01FF01	Antineoplastic Agents (L01)
pembrolizumab	L01FF02	Antineoplastic Agents (L01)
durvalumab	L01FF03	Antineoplastic Agents (L01)
avelumab	L01FF04	Antineoplastic Agents (L01)
atezolizumab	L01FF05	Antineoplastic Agents (L01)
bevacizumab	L01FG01	Antineoplastic Agents (L01)
ramucirumab	L01FG02	Antineoplastic Agents (L01)
ipilimumab	L01FX04	Antineoplastic Agents (L01)
brentuximab vedotin	L01FX05	Antineoplastic Agents (L01)
blinatumomab	L01FX07	Antineoplastic Agents (L01)
elotuzumab	L01FX08	Antineoplastic Agents (L01)
olaratumab	L01FX10	Antineoplastic Agents (L01)
tretinoin	L01XF01	Antineoplastic Agents (L01)
alitretinoin	L01XF02	Antineoplastic Agents (L01)
bexarotene	L01XF03	Antineoplastic Agents (L01)
bortezomib	L01XG01	Antineoplastic Agents (L01)
carfilzomib	L01XG02	Antineoplastic Agents (L01)
ixazomib	L01XG03	Antineoplastic Agents (L01)
vorinostat	L01XH01	Antineoplastic Agents (L01)
romidepsin	L01XH02	Antineoplastic Agents (L01)
panobinostat	L01XH03	Antineoplastic Agents (L01)
belinostat	L01XH04	Antineoplastic Agents (L01)
olaparib	L01XK01	Antineoplastic Agents (L01)
niraparib	L01XK02	Antineoplastic Agents (L01)
rucaparib	L01XK03	Antineoplastic Agents (L01)
talazoparib	L01XK04	Antineoplastic Agents (L01)
pentostatin	L01XX08	Antineoplastic Agents (L01)
masoprocol	L01XX10	Antineoplastic Agents (L01)
estramustine	L01XX11	Antineoplastic Agents (L01)
mitotane	L01XX23	Antineoplastic Agents (L01)
pegaspargase	L01XX24	Antineoplastic Agents (L01)
arsenic trioxide	L01XX27	Antineoplastic Agents (L01)
denileukin diftitox	L01XX29	Antineoplastic Agents (L01)
anagrelide	L01XX35	Antineoplastic Agents (L01)
eribulin	L01XX41	Antineoplastic Agents (L01)
aflibercept	L01XX44	Antineoplastic Agents (L01)
venetoclax	L01XX52	Antineoplastic Agents (L01)
ivosidenib	L01XX62	Antineoplastic Agents (L01)
abacavir	J05AF06	Direct Acting Antivirals (J05A)
amprenavir	J05AE05	Direct Acting Antivirals (J05A)
darunavir	J05AE10	Direct Acting Antivirals (J05A)
delavirdine	J05AG02	Direct Acting Antivirals (J05A)
didanosine	J05AF02	Direct Acting Antivirals (J05A)
efavirenz	J05AG03	Direct Acting Antivirals (J05A)
emtricitabine	J05AF09	Direct Acting Antivirals (J05A)
enfuvirtide	J05AX07	Direct Acting Antivirals (J05A)
fosamprenavir	J05AE07	Direct Acting Antivirals (J05A)
indinavir	J05AE02	Direct Acting Antivirals (J05A)
maraviroc	J05AX09	Direct Acting Antivirals (J05A)
nelfinavir	J05AE04	Direct Acting Antivirals (J05A)
nevirapine	J05AG01	Direct Acting Antivirals (J05A)
rilpivirine	J05AG05	Direct Acting Antivirals (J05A)
ritonavir	J05AE03	Direct Acting Antivirals (J05A)
stavudine	J05AF04	Direct Acting Antivirals (J05A)
tipranavir	J05AE09	Direct Acting Antivirals (J05A)
zidovudine	J05AF01	Direct Acting Antivirals (J05A)
cidofovir	J05AB12	Direct Acting Antivirals (J05A)
famciclovir	J05AB09	Direct Acting Antivirals (J05A)
foscarnet	J05AD01	Direct Acting Antivirals (J05A)
ganciclovir	J05AB06	Direct Acting Antivirals (J05A)
oseltamivir	J05AH02	Direct Acting Antivirals (J05A)
penciclovir	J05AB13	Direct Acting Antivirals (J05A)
peramivir	J05AH03	Direct Acting Antivirals (J05A)
ribavirin	J05AP01	Direct Acting Antivirals (J05A)
rimantadine	J05AC02	Direct Acting Antivirals (J05A)
telaprevir	J05AP02	Direct Acting Antivirals (J05A)
valganciclovir	J05AB14	Direct Acting Antivirals (J05A)
zanamivir	J05AH01	Direct Acting Antivirals (J05A)
idoxuridine	J05AB02	Direct Acting Antivirals (J05A)
vidarabine	J05AB03	Direct Acting Antivirals (J05A)
saquinavir	J05AE01	Direct Acting Antivirals (J05A)
zalcitabine	J05AF03	Direct Acting Antivirals (J05A)
lamivudine	J05AF05	Direct Acting Antivirals (J05A)
entecavir	J05AF10	Direct Acting Antivirals (J05A)
telbivudine	J05AF11	Direct Acting Antivirals (J05A)
etravirine	J05AG04	Direct Acting Antivirals (J05A)
dolutegravir	J05AJ03	Direct Acting Antivirals (J05A)
simeprevir	J05AP05	Direct Acting Antivirals (J05A)
sofosbuvir	J05AP08	Direct Acting Antivirals (J05A)
aminophylline	R03DA05	Drugs for Obstructive Airway Diseases (R03)
bitolterol	R03AC17	Drugs for Obstructive Airway Diseases (R03)
budesonide	R03BA02	Drugs for Obstructive Airway Diseases (R03)
ciclesonide	R03BA08	Drugs for Obstructive Airway Diseases (R03)
flunisolide	R03BA03	Drugs for Obstructive Airway Diseases (R03)
fluticasone	R03BA05	Drugs for Obstructive Airway Diseases (R03)
mepolizumab	R03DX09	Drugs for Obstructive Airway Diseases (R03)
montelukast	R03DC03	Drugs for Obstructive Airway Diseases (R03)
omalizumab	R03DX05	Drugs for Obstructive Airway Diseases (R03)
pirbuterol	R03AC08	Drugs for Obstructive Airway Diseases (R03)
roflumilast	R03DX07	Drugs for Obstructive Airway Diseases (R03)
terbutaline	R03AC03	Drugs for Obstructive Airway Diseases (R03)
theophylline	R03DA04	Drugs for Obstructive Airway Diseases (R03)
tiotropium bromide	R03BB04	Drugs for Obstructive Airway Diseases (R03)
zafirlukast	R03DC01	Drugs for Obstructive Airway Diseases (R03)
indacaterol	R03AC18	Drugs for Obstructive Airway Diseases (R03)
olodaterol	R03AC19	Drugs for Obstructive Airway Diseases (R03)
aclidinium bromide	R03BB05	Drugs for Obstructive Airway Diseases (R03)
nedocromil	R03BC03	Drugs for Obstructive Airway Diseases (R03)
ephedrine	R03CA02	Drugs for Obstructive Airway Diseases (R03)
amlexanox	R03DX01	Drugs for Obstructive Airway Diseases (R03)
reslizumab	R03DX08	Drugs for Obstructive Airway Diseases (R03)
benralizumab	R03DX10	Drugs for Obstructive Airway Diseases (R03)
amantadine	N04BB01	Anti-Parkinson Drugs (N04)
entacapone	N04BX02	Anti-Parkinson Drugs (N04)
istradefylline	N04CX01	Anti-Parkinson Drugs (N04)
levodopa	N04BA01	Anti-Parkinson Drugs (N04)
pergolide	N04BC02	Anti-Parkinson Drugs (N04)
pramipexole	N04BC05	Anti-Parkinson Drugs (N04)
rasagiline	N04BD02	Anti-Parkinson Drugs (N04)
ropinirole	N04BC04	Anti-Parkinson Drugs (N04)
rotigotine	N04BC09	Anti-Parkinson Drugs (N04)
safinamide	N04BD03	Anti-Parkinson Drugs (N04)
selegiline	N04BD01	Anti-Parkinson Drugs (N04)
tolcapone	N04BX01	Anti-Parkinson Drugs (N04)
trihexyphenidyl	N04AA01	Anti-Parkinson Drugs (N04)
biperiden	N04AA02	Anti-Parkinson Drugs (N04)
procyclidine	N04AA04	Anti-Parkinson Drugs (N04)
bromocriptine	N04BC01	Anti-Parkinson Drugs (N04)
cabergoline	N04BC06	Anti-Parkinson Drugs (N04)
apomorphine	N04BC07	Anti-Parkinson Drugs (N04)
opicapone	N04BX04	Anti-Parkinson Drugs (N04)
amitriptyline	N06AA09	Psychoanaleptics (N06)
amoxapine	N06AA17	Psychoanaleptics (N06)
bupropion	N06AX12	Psychoanaleptics (N06)
citalopram	N06AB04	Psychoanaleptics (N06)
fluoxetine	N06AB03	Psychoanaleptics (N06)
fluvoxamine	N06AB08	Psychoanaleptics (N06)
maprotiline	N06AA21	Psychoanaleptics (N06)
mirtazapine	N06AX11	Psychoanaleptics (N06)
nefazodone	N06AX06	Psychoanaleptics (N06)
nortriptyline	N06AA10	Psychoanaleptics (N06)
paroxetine	N06AB05	Psychoanaleptics (N06)
protriptyline	N06AA11	Psychoanaleptics (N06)
sertraline	N06AB06	Psychoanaleptics (N06)
trazodone	N06AX05	Psychoanaleptics (N06)
trimipramine	N06AA06	Psychoanaleptics (N06)
desipramine	N06AA01	Psychoanaleptics (N06)
imipramine	N06AA02	Psychoanaleptics (N06)
clomipramine	N06AA04	Psychoanaleptics (N06)
doxepin	N06AA12	Psychoanaleptics (N06)
isocarboxazid	N06AF01	Psychoanaleptics (N06)
phenelzine	N06AF03	Psychoanaleptics (N06)
tranylcypromine	N06AF04	Psychoanaleptics (N06)
viloxazine	N06AX09	Psychoanaleptics (N06)
milnacipran	N06AX17	Psychoanaleptics (N06)
vortioxetine	N06AX26	Psychoanaleptics (N06)
methylphenidate	N06BA04	Psychoanaleptics (N06)
pemoline	N06BA05	Psychoanaleptics (N06)
modafinil	N06BA07	Psychoanaleptics (N06)
caffeine	N06BC01	Psychoanaleptics (N06)
tacrine	N06DA01	Psychoanaleptics (N06)
donepezil	N06DA02	Psychoanaleptics (N06)
rivastigmine	N06DA03	Psychoanaleptics (N06)
galantamine	N06DA04	Psychoanaleptics (N06)
memantine	N06DX01	Psychoanaleptics (N06)
abciximab	B01AC13	Antithrombotic Agents (B01)
argatroban	B01AE03	Antithrombotic Agents (B01)
bivalirudin	B01AE06	Antithrombotic Agents (B01)
cilostazol	B01AC23	Antithrombotic Agents (B01)
clopidogrel	B01AC04	Antithrombotic Agents (B01)
dalteparin	B01AB04	Antithrombotic Agents (B01)
danaparoid	B01AB09	Antithrombotic Agents (B01)
defibrotide	B01AX01	Antithrombotic Agents (B01)
desirudin	B01AE01	Antithrombotic Agents (B01)
dipyridamole	B01AC07	Antithrombotic Agents (B01)
enoxaparin	B01AB05	Antithrombotic Agents (B01)
eptifibatide	B01AC16	Antithrombotic Agents (B01)
fibrinolysin	B01AD05	Antithrombotic Agents (B01)
fondaparinux	B01AX05	Antithrombotic Agents (B01)
heparin	B01AB01	Antithrombotic Agents (B01)
phenindione	B01AA02	Antithrombotic Agents (B01)
phenprocoumon	B01AA04	Antithrombotic Agents (B01)
reteplase	B01AD07	Antithrombotic Agents (B01)
tenecteplase	B01AD11	Antithrombotic Agents (B01)
tinzaparin	B01AB10	Antithrombotic Agents (B01)
tirofiban	B01AC17	Antithrombotic Agents (B01)
warfarin	B01AA03	Antithrombotic Agents (B01)
ticlopidine	B01AC05	Antithrombotic Agents (B01)
epoprostenol	B01AC09	Antithrombotic Agents (B01)
iloprost	B01AC11	Antithrombotic Agents (B01)
treprostinil	B01AC21	Antithrombotic Agents (B01)
ticagrelor	B01AC24	Antithrombotic Agents (B01)
cangrelor	B01AC25	Antithrombotic Agents (B01)
vorapaxar	B01AC26	Antithrombotic Agents (B01)
selexipag	B01AC27	Antithrombotic Agents (B01)
rivaroxaban	B01AF01	Antithrombotic Agents (B01)
apixaban	B01AF02	Antithrombotic Agents (B01)
atorvastatin	C10AA05	Lipid modifying agents, Plain (C10A)
cerivastatin	C10AA06	Lipid modifying agents, Plain (C10A)
clofibrate	C10AB01	Lipid modifying agents, Plain (C10A)
colestipol	C10AC02	Lipid modifying agents, Plain (C10A)
dextrothyroxine	C10AX01	Lipid modifying agents, Plain (C10A)
ezetimibe	C10AX09	Lipid modifying agents, Plain (C10A)
fenofibrate	C10AB05	Lipid modifying agents, Plain (C10A)
fluvastatin	C10AA04	Lipid modifying agents, Plain (C10A)
gemfibrozil	C10AB04	Lipid modifying agents, Plain (C10A)
lovastatin	C10AA02	Lipid modifying agents, Plain (C10A)
pitavastatin	C10AA08	Lipid modifying agents, Plain (C10A)
pravastatin	C10AA03	Lipid modifying agents, Plain (C10A)
probucol	C10AX02	Lipid modifying agents, Plain (C10A)
simvastatin	C10AA01	Lipid modifying agents, Plain (C10A)
mipomersen	C10AX11	Lipid modifying agents, Plain (C10A)
evolocumab	C10AX13	Lipid modifying agents, Plain (C10A)
alirocumab	C10AX14	Lipid modifying agents, Plain (C10A)
chlorpromazine	N05AA01	Antipsychotics (N05A)
triflupromazine	N05AA05	Antipsychotics (N05A)
promazine	N05AA03	Antipsychotics (N05A)
acetophenazine	N05AB07	Antipsychotics (N05A)
fluphenazine	N05AB02	Antipsychotics (N05A)
perphenazine	N05AB03	Antipsychotics (N05A)
thioridazine	N05AC02	Antipsychotics (N05A)
mesoridazine	N05AC03	Antipsychotics (N05A)
haloperidol	N05AD01	Antipsychotics (N05A)
droperidol	N05AD08	Antipsychotics (N05A)
molindone	N05AE02	Antipsychotics (N05A)
ziprasidone	N05AE04	Antipsychotics (N05A)
chlorprothixene	N05AF03	Antipsychotics (N05A)
pimozide	N05AG02	Antipsychotics (N05A)
olanzapine	N05AH03	Antipsychotics (N05A)
loxapine	N05AH01	Antipsychotics (N05A)
clozapine	N05AH02	Antipsychotics (N05A)
asenapine	N05AH05	Antipsychotics (N05A)
amisulpride	N05AL05	Antipsychotics (N05A)
risperidone	N05AX08	Antipsychotics (N05A)
aripiprazole	N05AX12	Antipsychotics (N05A)
iloperidone	N05AX14	Antipsychotics (N05A)
prochlorperazine	N05AB04	Antipsychotics (N05A)
trifluoperazine	N05AB06	Antipsychotics (N05A)
cariprazine	N05AX15	Antipsychotics (N05A)
brexpiprazole	N05AX16	Antipsychotics (N05A)
pimavanserin	N05AX17	Antipsychotics (N05A)
penbutolol	C07AA23	Beta-blocking agents (C07A)
pindolol	C07AA03	Beta-blocking agents (C07A)
propranolol	C07AA05	Beta-blocking agents (C07A)
oxprenolol	C07AA02	Beta-blocking agents (C07A)
carteolol	C07AA15	Beta-blocking agents (C07A)
timolol	C07AA06	Beta-blocking agents (C07A)
nadolol	C07AA12	Beta-blocking agents (C07A)
sotalol	C07AA07	Beta-blocking agents (C07A)
metoprolol	C07AB02	Beta-blocking agents (C07A)
atenolol	C07AB03	Beta-blocking agents (C07A)
acebutolol	C07AB04	Beta-blocking agents (C07A)
betaxolol	C07AB05	Beta-blocking agents (C07A)
bisoprolol	C07AB07	Beta-blocking agents (C07A)
esmolol	C07AB09	Beta-blocking agents (C07A)
labetalol	C07AG01	Beta-blocking agents (C07A)
carvedilol	C07AG02	Beta-blocking agents (C07A)
nebivolol	C07AB12	Beta-blocking agents (C07A)
dolasetron	A04AA04	Antiemetics and Antinauseants (A04A)
granisetron	A04AA02	Antiemetics and Antinauseants (A04A)
ondansetron	A04AA01	Antiemetics and Antinauseants (A04A)
palonosetron	A04AA05	Antiemetics and Antinauseants (A04A)
scopolamine	A04AD01	Antiemetics and Antinauseants (A04A)
dronabinol	A04AD10	Antiemetics and Antinauseants (A04A)
nabilone	A04AD11	Antiemetics and Antinauseants (A04A)
aprepitant	A04AD12	Antiemetics and Antinauseants (A04A)
metrizoic acid	V08AA02	Contrast Media (V08)
iodamide	V08AA03	Contrast Media (V08)
metrizamide	V08AB01	Contrast Media (V08)
iohexol	V08AB02	Contrast Media (V08)
iopamidol	V08AB04	Contrast Media (V08)
iopromide	V08AB05	Contrast Media (V08)
iotrolan	V08AB06	Contrast Media (V08)
ioversol	V08AB07	Contrast Media (V08)
iodixanol	V08AB09	Contrast Media (V08)
ioxilan	V08AB12	Contrast Media (V08)
iopanoic acid	V08AC06	Contrast Media (V08)
propyliodone	V08AD03	Contrast Media (V08)
gadodiamide	V08CA03	Contrast Media (V08)
gadoteridol	V08CA04	Contrast Media (V08)
gadoversetamide	V08CA06	Contrast Media (V08)
ferric ammonium citrate	V08CA07	Contrast Media (V08)
gadobutrol	V08CA09	Contrast Media (V08)
ferumoxsil	V08CB01	Contrast Media (V08)
perflubron	V08CX01	Contrast Media (V08)
iocetamic acid	V08AC07	Contrast Media (V08)
primidone	N03AA03	Antiepileptics (N03A)
ethotoin	N03AB01	Antiepileptics (N03A)
phenytoin	N03AB02	Antiepileptics (N03A)
mephenytoin	N03AB04	Antiepileptics (N03A)
fosphenytoin	N03AB05	Antiepileptics (N03A)
paramethadione	N03AC01	Antiepileptics (N03A)
trimethadione	N03AC02	Antiepileptics (N03A)
ethosuximide	N03AD01	Antiepileptics (N03A)
phensuximide	N03AD02	Antiepileptics (N03A)
carbamazepine	N03AF01	Antiepileptics (N03A)
oxcarbazepine	N03AF02	Antiepileptics (N03A)
rufinamide	N03AF03	Antiepileptics (N03A)
valproic acid	N03AG01	Antiepileptics (N03A)
vigabatrin	N03AG04	Antiepileptics (N03A)
tiagabine	N03AG06	Antiepileptics (N03A)
phenacemide	N03AX07	Antiepileptics (N03A)
lamotrigine	N03AX09	Antiepileptics (N03A)
felbamate	N03AX10	Antiepileptics (N03A)
topiramate	N03AX11	Antiepileptics (N03A)
gabapentin	N03AX12	Antiepileptics (N03A)
levetiracetam	N03AX14	Antiepileptics (N03A)
zonisamide	N03AX15	Antiepileptics (N03A)
pregabalin	N03AX16	Antiepileptics (N03A)
stiripentol	N03AX17	Antiepileptics (N03A)
lacosamide	N03AX18	Antiepileptics (N03A)
fenfluramine	N03AX26	Antiepileptics (N03A)
metharbital	N03AA30	Antiepileptics (N03A)
clonazepam	N03AE01	Antiepileptics (N03A)
eslicarbazepine	N03AF04	Antiepileptics (N03A)
perampanel	N03AX22	Antiepileptics (N03A)
brivaracetam	N03AX23	Antiepileptics (N03A)
cannabidiol	N03AX24	Antiepileptics (N03A)
chlorothiazide	C03AA04	Diuretics (C03)
hydroflumethiazide	C03AA02	Diuretics (C03)
trichlormethiazide	C03AA06	Diuretics (C03)
methyclothiazide	C03AA08	Diuretics (C03)
polythiazide	C03AA05	Diuretics (C03)
bendroflumethiazide	C03AA01	Diuretics (C03)
hydrochlorothiazide	C03AA03	Diuretics (C03)
cyclothiazide	C03AA09	Diuretics (C03)
quinethazone	C03BA02	Diuretics (C03)
metolazone	C03BA08	Diuretics (C03)
indapamide	C03BA11	Diuretics (C03)
mersalyl	C03BC01	Diuretics (C03)
furosemide	C03CA01	Diuretics (C03)
bumetanide	C03CA02	Diuretics (C03)
spironolactone	C03DA01	Diuretics (C03)
eplerenone	C03DA04	Diuretics (C03)
amiloride	C03DB01	Diuretics (C03)
tolvaptan	C03XA01	Diuretics (C03)
conivaptan	C03XA02	Diuretics (C03)
halothane	N01AB01	Anesthetics (N01)
enflurane	N01AB04	Anesthetics (N01)
isoflurane	N01AB06	Anesthetics (N01)
desflurane	N01AB07	Anesthetics (N01)
methohexital	N01AF01	Anesthetics (N01)
thiopental	N01AF03	Anesthetics (N01)
fentanyl	N01AH01	Anesthetics (N01)
alfentanil	N01AH02	Anesthetics (N01)
sufentanil	N01AH03	Anesthetics (N01)
anileridine	N01AH05	Anesthetics (N01)
remifentanil	N01AH06	Anesthetics (N01)
ketamine	N01AX03	Anesthetics (N01)
etomidate	N01AX07	Anesthetics (N01)
propofol	N01AX10	Anesthetics (N01)
procaine	N01BA02	Anesthetics (N01)
tetracaine	N01BA03	Anesthetics (N01)
chloroprocaine	N01BA04	Anesthetics (N01)
bupivacaine	N01BB01	Anesthetics (N01)
lidocaine	N01BB02	Anesthetics (N01)
levobupivacaine	N01BB10	Anesthetics (N01)
mepivacaine	N01BB03	Anesthetics (N01)
prilocaine	N01BB04	Anesthetics (N01)
ropivacaine	N01BB09	Anesthetics (N01)
dyclonine	N01BX02	Anesthetics (N01)
capsaicin	N01BX04	Anesthetics (N01)
sodium oxybate	N01AX11	Anesthetics (N01)
etidocaine	N01BB07	Anesthetics (N01)
cocaine	N01BC01	Anesthetics (N01)
praziquantel	P02BA01	Anthelmintics (P02)
oxamniquine	P02BA02	Anthelmintics (P02)
triclabendazole	P02BX04	Anthelmintics (P02)
mebendazole	P02CA01	Anthelmintics (P02)
albendazole	P02CA03	Anthelmintics (P02)
levamisole	P02CE01	Anthelmintics (P02)
pyrvinium	P02CX01	Anthelmintics (P02)
niclosamide	P02DA01	Anthelmintics (P02)
piperazine	P02CB01	Anthelmintics (P02)
diethylcarbamazine	P02CB02	Anthelmintics (P02)
reserpine	C02AA02	Antihypertensives (C02)
guanfacine	C02AC02	Antihypertensives (C02)
clonidine	C02AC01	Antihypertensives (C02)
mecamylamine	C02BB01	Antihypertensives (C02)
prazosin	C02CA01	Antihypertensives (C02)
doxazosin	C02CA04	Antihypertensives (C02)
guanethidine	C02CC02	Antihypertensives (C02)
hydralazine	C02DB02	Antihypertensives (C02)
pinacidil	C02DG01	Antihypertensives (C02)
pargyline	C02KC01	Antihypertensives (C02)
bosentan	C02KX01	Antihypertensives (C02)
ambrisentan	C02KX02	Antihypertensives (C02)
rescinnamine	C02AA01	Antihypertensives (C02)
deserpidine	C02AA05	Antihypertensives (C02)
minoxidil	C02DC01	Antihypertensives (C02)
macitentan	C02KX04	Antihypertensives (C02)
riociguat	C02KX05	Antihypertensives (C02)
levonorgestrel	G03AC03	Sex hormones and modulators of the genital system (G03)
megestrol	G03AC05	Sex hormones and modulators of the genital system (G03)
medroxyprogesterone	G03AC06	Sex hormones and modulators of the genital system (G03)
etonogestrel	G03AC08	Sex hormones and modulators of the genital system (G03)
desogestrel	G03AC09	Sex hormones and modulators of the genital system (G03)
ulipristal	G03AD02	Sex hormones and modulators of the genital system (G03)
fluoxymesterone	G03BA01	Sex hormones and modulators of the genital system (G03)
methyltestosterone	G03BA02	Sex hormones and modulators of the genital system (G03)
testosterone	G03BA03	Sex hormones and modulators of the genital system (G03)
estradiol	G03CA03	Sex hormones and modulators of the genital system (G03)
chlorotrianisene	G03CA06	Sex hormones and modulators of the genital system (G03)
estrone	G03CA07	Sex hormones and modulators of the genital system (G03)
dienestrol	G03CB01	Sex hormones and modulators of the genital system (G03)
diethylstilbestrol	G03CB02	Sex hormones and modulators of the genital system (G03)
progesterone	G03DA04	Sex hormones and modulators of the genital system (G03)
dydrogesterone	G03DB01	Sex hormones and modulators of the genital system (G03)
dienogest	G03DB08	Sex hormones and modulators of the genital system (G03)
danazol	G03XA01	Sex hormones and modulators of the genital system (G03)
mifepristone	G03XB01	Sex hormones and modulators of the genital system (G03)
bazedoxifene	G03XC02	Sex hormones and modulators of the genital system (G03)
ospemifene	G03XC05	Sex hormones and modulators of the genital system (G03)
urofollitropin	G03GA04	Sex hormones and modulators of the genital system (G03)
magnesium carbonate	A02AA01	Drugs for Acid Related Disorder (A02)
magnesium hydroxide	A02AA04	Drugs for Acid Related Disorder (A02)
cimetidine	A02BA01	Drugs for Acid Related Disorder (A02)
ranitidine	A02BA02	Drugs for Acid Related Disorder (A02)
famotidine	A02BA03	Drugs for Acid Related Disorder (A02)
nizatidine	A02BA04	Drugs for Acid Related Disorder (A02)
misoprostol	A02BB01	Drugs for Acid Related Disorder (A02)
omeprazole	A02BC01	Drugs for Acid Related Disorder (A02)
pantoprazole	A02BC02	Drugs for Acid Related Disorder (A02)
lansoprazole	A02BC03	Drugs for Acid Related Disorder (A02)
rabeprazole	A02BC04	Drugs for Acid Related Disorder (A02)
esomeprazole	A02BC05	Drugs for Acid Related Disorder (A02)
dexlansoprazole	A02BC06	Drugs for Acid Related Disorder (A02)
sucralfate	A02BX02	Drugs for Acid Related Disorder (A02)
magnesium oxide	A02AA02	Drugs for Acid Related Disorder (A02)
calcium carbonate	A02AC01	Drugs for Acid Related Disorder (A02)
nifedipine	C08CA05	Calcium Channel Blockers (C08)
nimodipine	C08CA06	Calcium Channel Blockers (C08)
nicardipine	C08CA04	Calcium Channel Blockers (C08)
isradipine	C08CA03	Calcium Channel Blockers (C08)
amlodipine	C08CA01	Calcium Channel Blockers (C08)
felodipine	C08CA02	Calcium Channel Blockers (C08)
clevidipine	C08CA16	Calcium Channel Blockers (C08)
nisoldipine	C08CA07	Calcium Channel Blockers (C08)
verapamil	C08DA01	Calcium Channel Blockers (C08)
diltiazem	C08DB01	Calcium Channel Blockers (C08)
bepridil	C08EA02	Calcium Channel Blockers (C08)
levamlodipine	C08CA17	Calcium Channel Blockers (C08)
moexipril	C09AA13	Agents Acting on the Renin-Angiotensin System (C09)
spirapril	C09AA11	Agents Acting on the Renin-Angiotensin System (C09)
perindopril	C09AA04	Agents Acting on the Renin-Angiotensin System (C09)
benazepril	C09AA07	Agents Acting on the Renin-Angiotensin System (C09)
ramipril	C09AA05	Agents Acting on the Renin-Angiotensin System (C09)
enalapril	C09AA02	Agents Acting on the Renin-Angiotensin System (C09)
trandolapril	C09AA10	Agents Acting on the Renin-Angiotensin System (C09)
captopril	C09AA01	Agents Acting on the Renin-Angiotensin System (C09)
fosinopril	C09AA09	Agents Acting on the Renin-Angiotensin System (C09)
lisinopril	C09AA03	Agents Acting on the Renin-Angiotensin System (C09)
quinapril	C09AA06	Agents Acting on the Renin-Angiotensin System (C09)
losartan	C09CA01	Agents Acting on the Renin-Angiotensin System (C09)
valsartan	C09CA03	Agents Acting on the Renin-Angiotensin System (C09)
telmisartan	C09CA07	Agents Acting on the Renin-Angiotensin System (C09)
candesartan	C09CA06	Agents Acting on the Renin-Angiotensin System (C09)
irbesartan	C09CA04	Agents Acting on the Renin-Angiotensin System (C09)
eprosartan	C09CA02	Agents Acting on the Renin-Angiotensin System (C09)
aliskiren	C09XA02	Agents Acting on the Renin-Angiotensin System (C09)

## Sheet: Hclust Experiment 1 Results
Drugs	Cluster Number					Cluster Number	Number of Drugs in the cluster
chloroquine	1					1	14
amodiaquine	1					2	26
quinine	1					3	436
primaquine	1					4	28
proguanil	1					5	24
pyrimethamine	1					6	65
sulfadoxine	1					7	76
mefloquine	1					8	31
artesunate	1					9	24
halofantrine	1					10	30
artemether	1					11	69
atovaquone	1					12	14
tafenoquine	1					13	31
lumefantrine	1					14	30
morphine	2					15	25
dopamine	2					16	27
chlordiazepoxide	2					17	14
amphetamine	2					18	31
apomorphine	2					19	26
chlorpromazine	2					20	62
nicotine	2					21	25
dextroamphetamine	2					22	18
reserpine	2					23	26
scopolamine	2					24	35
cocaine	2					25	37
diazepam	2					26	21
cannabidiol	2					27	36
dronabinol	2					28	35
pentobarbital	2					29	22
haloperidol	2					30	33
meprobamate	2					31	40
naloxone	2					32	15
pilocarpine	2					33	11
methamphetamine	2					34	28
mecamylamine	2					35	16
baclofen	2					36	27
methylphenidate	2					37	22
naltrexone	2					38	16
sodium oxybate	2					39	27
flumazenil	2					40	10
metaraminol	3					41	31
malathion	3					42	28
dihydroergotamine	3					43	12
nitrofurazone	3					44	7
oxytocin	3					45	8
gallamine triethiodide	3
acetazolamide	3
mephenytoin	3
magnesium sulfate	3
methadone	3
minoxidil	3
isoflurophate	3
methyldopa	3
disulfiram	3
propantheline	3
glycopyrrolate	3
droxidopa	3
methimazole	3
penicillin g benzathine	3
bethanidine	3
nitrofurantoin	3
mafenide	3
cysteamine	3
sulfacetamide	3
tubocurarine	3
ergotamine	3
neostigmine	3
trimethaphan	3
oxyphenonium	3
paromomycin	3
ritodrine	3
probenecid	3
ethacrynic acid	3
furosemide	3
benzphetamine	3
lypressin	3
mersalyl	3
piperazine	3
chlorphentermine	3
phentermine	3
mephentermine	3
clioquinol	3
amiloride	3
phenmetrazine	3
edrophonium	3
methenamine	3
sulfamerazine	3
diethylpropion	3
ergoloid mesylates	3
cephapirin	3
bumetanide	3
levamisole	3
paramethasone	3
sulfinpyrazone	3
propylthiouracil	3
guanabenz	3
deferoxamine	3
thiabendazole	3
candicidin	3
pentolinium tartrate	3
tinidazole	3
pentamidine	3
tolazoline	3
bromocriptine	3
diethylcarbamazine	3
hexachlorophene	3
tiopronin	3
ethoxzolamide	3
pemoline	3
penicillin g procaine	3
piperonyl butoxide	3
dimercaprol	3
cephaloglycin	3
propiolactone	3
pyridostigmine bromide	3
pyrethrins	3
betazole	3
methacycline	3
magnesium hydroxide	3
methylergonovine	3
chlormerodrin	3
sulfisoxazole	3
silver sulfadiazine	3
cyclacillin	3
sulfaphenazole	3
methazolamide	3
demeclocycline	3
oxamniquine	3
iopanoic acid	3
niclosamide	3
dantrolene	3
mebendazole	3
galantamine	3
pentoxifylline	3
sulfamethizole	3
troleandomycin	3
sodium nitrite	3
calcium gluconate	3
buprenorphine	3
potassium iodide	3
chlormezanone	3
praziquantel	3
permethrin	3
guanfacine	3
plicamycin	3
flumethasone	3
midodrine	3
selenomethionine	3
furazolidone	3
ipodate	3
isosorbide	3
menthol	3
chlorphenesin	3
nifurtimox	3
hydroxocobalamin	3
dichlorphenamide	3
succimer	3
propyliodone	3
pyrithione	3
manganese chloride	3
tacrine	3
trientine	3
sodium tetradecyl sulfate	3
carboprost	3
estetrol	3
carisoprodol	3
sulfameter	3
tyropanoate	3
memantine	3
chlorzoxazone	3
haloprogin	3
bacampicillin	3
amifostine	3
ambenonium chloride	3
benzyl alcohol	3
selenious acid	3
sodium acetate	3
lutetium	3
bentiromide	3
zinc chloride	3
phenazopyridine	3
oxyphencyclimine	3
hetacillin	3
bismuth subsalicylate	3
medrysone	3
zinc sulfate	3
methocarbamol	3
ferrous sulfate	3
albendazole	3
ivermectin	3
clidinium	3
tizanidine	3
polidocanol	3
hydroxystilbamidine	3
pipobroman	3
sapropterin	3
mifepristone	3
miltefosine	3
octreotide	3
moexipril	3
cyclothiazide	3
hydroquinone	3
pralidoxime	3
cilostazol	3
amifampridine	3
misoprostol	3
cabergoline	3
sodium carbonate	3
perflubron	3
tartaric acid	3
spirapril	3
orlistat	3
iofetamine	3
eprosartan	3
bretylium	3
magnesium carbonate	3
diphemanil methylsulfate	3
ferric ammonium citrate	3
deflazacort	3
bupropion	3
sodium thiosulfate	3
chromic chloride	3
fluocinolone	3
poractant alfa	3
sargramostim	3
sodium sulfate	3
triclofos	3
ferumoxides	3
ferric citrate	3
fomepizole	3
nalmefene	3
sermorelin	3
mequinol	3
gallium nitrate	3
cupric chloride	3
potassium perchlorate	3
defibrotide	3
triclabendazole	3
deferiprone	3
trimetrexate	3
lanreotide	3
imciromab pentetate	3
colfosceril palmitate	3
beractant	3
ferrous fumarate	3
fenoldopam	3
bethanechol	3
modafinil	3
acamprosate	3
riluzole	3
sibutramine	3
lofexidine	3
nitisinone	3
benzquinamide	3
ferric maltol	3
potassium sulfate	3
secnidazole	3
amlexanox	3
crotamiton	3
cevimeline	3
cetyl alcohol	3
miglustat	3
dexpanthenol	3
monobenzone	3
decamethonium	3
anagrelide	3
donepezil	3
ingenol	3
methyl salicylate	3
pancrelipase	3
cyclobenzaprine	3
manganese sulfate	3
edaravone	3
benzyl benzoate	3
guanadrel	3
atomoxetine hydrochloride	3
acetohydroxamic acid	3
oxybenzone	3
denileukin diftitox	3
perflexane	3
histrelin	3
invert sugar	3
difenoxin	3
avobenzone	3
lithium citrate	3
magnesium trisilicate	3
arbutamine	3
valrubicin	3
benzonatate	3
dromostanolone	3
sodium lactate	3
menadiol	3
diphenidol	3
meclocycline	3
pyrvinium	3
zinc acetate	3
rivastigmine	3
pegademase bovine	3
butalbital	3
chloroxine	3
meprednisone	3
phendimetrazine	3
fidaxomicin	3
tridihexethyl	3
polyestradiol	3
ethynodiol	3
indecainide	3
levoleucovorin	3
hexocyclium	3
sulfoxone	3
cycrimine	3
potassium citrate	3
hexafluorenium	3
demecarium	3
methixene	3
pegloticase	3
ethinamate	3
quinethazone	3
nitazoxanide	3
anisindione	3
clocortolone pivalate	3
lapyrium	3
acetophenazine	3
bosentan	3
ezogabine	3
migalastat	3
ferumoxsil	3
ulipristal	3
aldesleukin	3
imiglucerase	3
febuxostat	3
ardeparin	3
metharbital	3
zaleplon	3
octocrylene	3
metaxalone	3
flibanserin	3
fomivirsen	3
epoetin alfa	3
methantheline	3
rescinnamine	3
sodium citrate	3
capromab pendetide	3
sildenafil citrate	3
bentoquatam	3
potassium acetate	3
isopropamide iodide	3
conivaptan	3
icodextrin	3
propiomazine	3
alatrofloxacin	3
palivizumab	3
gadoversetamide	3
sodium benzoate	3
tolvaptan	3
calfactant	3
fluciclovine f-18	3
clevidipine	3
pegvisomant	3
spinosad	3
methyprylon	3
deferasirox	3
metreleptin	3
darbepoetin alfa	3
treprostinil	3
abarelix	3
tadalafil	3
regadenoson	3
rasburicase	3
pasireotide	3
dexmethylphenidate hydrochloride	3
agalsidase beta	3
dexlansoprazole	3
obeticholic acid	3
ambrisentan	3
macimorelin	3
fospropofol	3
tasimelteon	3
bremelanotide	3
deserpidine	3
piperacetazine	3
levopropoxyphene	3
tofacitinib	3
tesamorelin	3
voclosporin	3
romiplostim	3
eculizumab	3
ramelteon	3
teduglutide	3
obiltoxaximab	3
lucinactant	3
varenicline	3
incobotulinumtoxina	3
siltuximab	3
lorcaserin	3
galsulfase	3
ecallantide	3
mipomersen	3
lisdexamfetamine dimesylate	3
ioflupane	3
eltrombopag	3
idursulfase	3
azilsartan	3
eliglustat	3
selexipag	3
remimazolam	3
ferric carboxymaltose	3
eszopiclone	3
carglumic acid	3
necitumumab	3
rilonacept	3
triheptanoin	3
macitentan	3
elagolix	3
crofelemer	3
afamelanotide	3
riociguat	3
levamlodipine	3
canakinumab	3
raxibacumab	3
flutemetamol	3
ivacaftor	3
lumacaftor	3
eteplirsen	3
tafamidis	3
florbetapir	3
abobotulinumtoxina	3
lifitegrast	3
ponesimod	3
suvorexant	3
avanafil	3
patiromer	3
taliglucerase alfa	3
peginesatide	3
relugolix	3
levomefolate calcium	3
dornase alfa	3
apalutamide	3
asfotase alfa	3
alirocumab	3
evolocumab	3
interferon gamma-1b	3
eluxadoline	3
dexrazoxane	3
telotristat	3
ozenoxacin	3
vericiguat	3
sarilumab	3
doravirine	3
olaratumab	3
lesinurad	3
tipiracil	3
tenapanor	3
sucroferric oxyhydroxide	3
nusinersen	3
bezlotoxumab	3
baricitinib	3
darolutamide	3
encorafenib	3
abaloparatide	3
valbenazine	3
sebelipase alfa	3
gilteritinib	3
patisiran	3
capmatinib	3
ozanimod	3
emicizumab	3
lusutrombopag	3
mecasermin	3
deutetrabenazine	3
bictegravir	3
brexanolone	3
cerliponase alfa	3
vaborbactam	3
voxelotor	3
baloxavir	3
epinephrine	4
propranolol	4
isoproterenol	4
phenoxybenzamine	4
pentagastrin	4
norepinephrine	4
histamine	4
acetylcholine	4
atropine	4
phentolamine	4
phenylephrine	4
secretin	4
clonidine	4
guanethidine	4
carbachol	4
indomethacin	4
ceruletide	4
methoxamine	4
prazosin	4
evans blue	4
epoprostenol	4
capsaicin	4
dinoprostone	4
alprostadil	4
dinoprost	4
sincalide	4
iloprost	4
masoprocol	4
isocarboxazid	5
methysergide	5
cyproheptadine	5
mazindol	5
levodopa	5
pargyline	5
pimozide	5
carbidopa	5
tranylcypromine	5
phenelzine	5
fenfluramine	5
tetrabenazine	5
selegiline	5
pergolide	5
entacapone	5
rotigotine	5
pramipexole	5
tolcapone	5
ropinirole	5
rasagiline	5
safinamide	5
istradefylline	5
pimavanserin	5
opicapone	5
procaine	6
glutethimide	6
lidocaine	6
prochlorperazine	6
diphenhydramine	6
promethazine	6
pyrilamine	6
chlorpheniramine	6
tripelennamine	6
doxapram	6
tetracaine	6
acetaminophen	6
meperidine	6
ephedrine	6
levorphanol	6
codeine	6
pentazocine	6
ethchlorvynol	6
guaifenesin	6
secobarbital	6
hydroxyzine	6
bupivacaine	6
dibucaine	6
etidocaine	6
mepivacaine	6
dextromethorphan	6
oxymorphone	6
meclizine	6
oxycodone	6
cyclizine	6
thiamylal	6
hydrocodone	6
levallorphan	6
dimenhydrinate	6
thiethylperazine	6
butorphanol	6
dihydrocodeine	6
hydromorphone	6
nalbuphine	6
prilocaine	6
dicyclomine	6
propoxycaine	6
doxylamine	6
dezocine	6
tramadol	6
ziconotide	6
ropivacaine	6
dyclonine	6
chloroprocaine	6
gabapentin	6
nabilone	6
pramoxine	6
dolasetron	6
benoxinate	6
trimethobenzamide	6
pseudoephedrine	6
anileridine	6
hexylcaine	6
palonosetron	6
pregabalin	6
aprepitant	6
levobupivacaine	6
netupitant	6
fosaprepitant	6
tapentadol	6
glutathione	7
tyrosine	7
urea	7
methylene blue	7
arginine	7
sodium chloride	7
potassium chloride	7
calcium	7
deoxycholic acid	7
cellulose	7
caffeine	7
glycine	7
dactinomycin	7
cysteine	7
glycerol	7
ascorbic acid	7
folic acid	7
uridine	7
xylose	7
calcium carbonate	7
pyridoxine	7
dimethyl sulfoxide	7
mannitol	7
lipase	7
ammonium chloride	7
choline	7
adenosine	7
calcium chloride	7
tromethamine	7
riboflavin	7
vitamin a	7
colchicine	7
biotin	7
sorbitol	7
hydroxyurea	7
lanthanum	7
thiamine	7
aluminum	7
silver	7
idoxuridine	7
magnesium oxide	7
uracil	7
chlorhexidine	7
inulin	7
allopurinol	7
polytetrafluoroethylene	7
betaine	7
gentian violet	7
pantothenic acid	7
acetylcysteine	7
vitamin e	7
sodium fluoride	7
floxuridine	7
trypan blue	7
povidone-iodine	7
zinc oxide	7
methoxsalen	7
beta carotene	7
sodium bicarbonate	7
gramicidin	7
trioxsalen	7
safflower oil	7
magnesium chloride	7
citric acid	7
triclosan	7
lactic acid	7
guanidine	7
cholic acid	7
fluorescein	7
soybean oil	7
olive oil	7
phosphoric acid	7
ethanolamine	7
titanium dioxide	7
alpha-tocopherol	7
polyethylene	7
digitoxin	8
oxprenolol	8
acebutolol	8
pindolol	8
verapamil	8
atenolol	8
diazoxide	8
dipyridamole	8
nitroglycerin	8
nifedipine	8
digoxin	8
deslanoside	8
labetalol	8
metoprolol	8
dobutamine	8
glyburide	8
diltiazem	8
penbutolol	8
nadolol	8
nicardipine	8
nimodipine	8
esmolol	8
milrinone	8
isradipine	8
nisoldipine	8
bisoprolol	8
carvedilol	8
pinacidil	8
nebivolol	8
ranolazine	8
ivabradine	8
cyclophosphamide	9
methotrexate	9
asparaginase	9
altretamine	9
lomustine	9
mercaptopurine	9
chlorambucil	9
mechlorethamine	9
thiotepa	9
daunorubicin	9
cytarabine	9
procarbazine	9
melphalan	9
busulfan	9
thioguanine	9
vincristine	9
carmustine	9
mesna	9
bleomycin	9
etoposide	9
teniposide	9
mitomycin	9
idarubicin	9
mitoxantrone	9
ifosfamide	10
niacinamide	10
vinblastine	10
doxorubicin	10
fluorouracil	10
leucovorin	10
dacarbazine	10
cisplatin	10
paclitaxel	10
epirubicin	10
carboplatin	10
sirolimus	10
vinorelbine	10
irinotecan	10
gemcitabine	10
topotecan	10
docetaxel	10
temozolomide	10
pemetrexed	10
oxaliplatin	10
cetuximab	10
everolimus	10
capecitabine	10
trastuzumab	10
erlotinib hydrochloride	10
gefitinib	10
panitumumab	10
lapatinib	10
sorafenib	10
sunitinib	10
cortisone	11
glucagon	11
hydrocortisone	11
insulin	11
testosterone	11
estradiol	11
menotropins	11
iodine	11
metyrapone	11
thyrotropin	11
mestranol	11
megestrol	11
progesterone	11
methyltestosterone	11
diethylstilbestrol	11
mitotane	11
clomiphene	11
estrone	11
ethinyl estradiol	11
norgestrel	11
norethindrone	11
desoxycorticosterone	11
aminoglutethimide	11
nandrolone	11
quinestrol	11
dienestrol	11
cosyntropin	11
oxymetholone	11
fludrocortisone	11
dydrogesterone	11
danazol	11
medroxyprogesterone	11
oxandrolone	11
ethylestrenol	11
chlorotrianisene	11
norethynodrel	11
estramustine	11
fluoxymesterone	11
stanozolol	11
flutamide	11
testolactone	11
levonorgestrel	11
desogestrel	11
estropipate	11
trilostane	11
goserelin	11
triptorelin pamoate	11
leuprolide	11
nilutamide	11
nafarelin	11
dienogest	11
etonogestrel	11
cetrorelix	11
norgestimate	11
raloxifene hydrochloride	11
toremifene	11
bicalutamide	11
ganirelix	11
letrozole	11
exemestane	11
drospirenone	11
norelgestromin	11
anastrozole	11
abiraterone	11
ospemifene	11
bazedoxifene	11
estrogens, conjugated synthetic a	11
urofollitropin	11
cabazitaxel	11
oxazepam	12
lorazepam	12
flurazepam	12
clonazepam	12
clorazepate dipotassium	12
temazepam	12
estazolam	12
triazolam	12
prazepam	12
alprazolam	12
buspirone	12
zolpidem	12
quazepam	12
halazepam	12
ipratropium	13
theophylline	13
aminophylline	13
metaproterenol	13
albuterol	13
beclomethasone	13
terbutaline	13
isoetharine	13
methacholine chloride	13
dyphylline	13
budesonide	13
pirbuterol	13
flunisolide	13
salmeterol xinafoate	13
formoterol fumarate	13
fluticasone	13
bitolterol	13
mometasone furoate	13
lodoxamide tromethamine	13
tiotropium bromide	13
ciclesonide	13
roflumilast	13
mepolizumab	13
protokylol	13
indacaterol	13
reslizumab	13
aclidinium bromide	13
olodaterol	13
vilanterol	13
benralizumab	13
levalbuterol	13
methoxyflurane	14
enflurane	14
isoflurane	14
halothane	14
ketamine	14
droperidol	14
pancuronium	14
thiopental	14
succinylcholine	14
fentanyl	14
methohexital	14
etomidate	14
sufentanil	14
midazolam	14
propofol	14
metocurine	14
atracurium	14
sevoflurane	14
alfentanil	14
desflurane	14
mivacurium	14
pipecuronium	14
rocuronium	14
vecuronium bromide	14
doxacurium	14
remifentanil	14
rapacuronium	14
cisatracurium	14
dexmedetomidine	14
sugammadex	14
spironolactone	15
hydralazine	15
saralasin	15
indapamide	15
captopril	15
benazepril	15
amlodipine	15
lisinopril	15
perindopril	15
enalapril	15
losartan	15
felodipine	15
icatibant	15
enalaprilat	15
ramipril	15
fosinopril	15
quinapril	15
trandolapril	15
candesartan	15
valsartan	15
irbesartan	15
telmisartan	15
eplerenone	15
olmesartan	15
aliskiren	15
phenytoin	16
primidone	16
carbamazepine	16
ethosuximide	16
valproic acid	16
trimethadione	16
phensuximide	16
vigabatrin	16
clobazam	16
stiripentol	16
methsuximide	16
rufinamide	16
zonisamide	16
tiagabine	16
lamotrigine	16
felbamate	16
oxcarbazepine	16
levetiracetam	16
fosphenytoin	16
topiramate	16
phenacemide	16
paramethadione	16
lacosamide	16
ethotoin	16
brivaracetam	16
perampanel	16
eslicarbazepine	16
quinidine	17
procainamide	17
sotalol	17
amiodarone	17
disopyramide	17
mexiletine	17
tocainide	17
propafenone	17
flecainide	17
bepridil	17
dofetilide	17
moricizine	17
ibutilide	17
dronedarone	17
imipramine	18
desipramine	18
amitriptyline	18
doxepin	18
clozapine	18
nortriptyline	18
maprotiline	18
clomipramine	18
protriptyline	18
trazodone	18
trimipramine	18
amoxapine	18
viloxazine	18
fluoxetine	18
lithium carbonate	18
citalopram	18
sertraline	18
risperidone	18
fluvoxamine	18
paroxetine	18
nefazodone	18
milnacipran	18
quetiapine fumarate	18
olanzapine	18
venlafaxine hydrochloride	18
mirtazapine	18
duloxetine hydrochloride	18
aripiprazole	18
desvenlafaxine succinate	18
vilazodone hydrochloride	18
vortioxetine	18
penicillin v	19
carbenicillin	19
ticarcillin	19
cloxacillin	19
cephradine	19
cephalexin	19
cephalothin	19
nafcillin	19
dicloxacillin	19
cefoxitin	19
cefamandole	19
cefaclor	19
netilmicin	19
azlocillin	19
mezlocillin	19
cefotiam	19
ceforanide	19
cefoperazone	19
ceftizoxime	19
aztreonam	19
cefotetan	19
cefmetazole	19
cefmenoxime	19
moxalactam	19
cefpiramide	19
cefonicid	19
dexamethasone	20
tretinoin	20
tamoxifen	20
sulindac	20
azacitidine	20
decitabine	20
eflornithine	20
midostaurin	20
rifabutin	20
becaplermin	20
arsenic trioxide	20
fulvestrant	20
romidepsin	20
pirfenidone	20
bexarotene	20
vorinostat	20
imatinib mesylate	20
trabectedin	20
alitretinoin	20
celecoxib	20
lonafarnib	20
bortezomib	20
temsirolimus	20
eribulin	20
ixabepilone	20
bosutinib	20
belinostat	20
pertuzumab	20
dasatinib	20
panobinostat	20
palbociclib	20
axitinib	20
ado-trastuzumab emtansine	20
ipilimumab	20
pazopanib	20
crizotinib	20
afatinib	20
fostamatinib	20
lenvatinib	20
nintedanib	20
rucaparib	20
olaparib	20
ramucirumab	20
cabozantinib	20
niraparib	20
ponatinib	20
vemurafenib	20
nivolumab	20
tivozanib	20
regorafenib	20
trametinib	20
dabrafenib	20
pembrolizumab	20
ceritinib	20
talazoparib	20
ribociclib	20
atezolizumab	20
durvalumab	20
avelumab	20
entrectinib	20
acalabrutinib	20
osimertinib	20
trifluoperazine	21
thiothixene	21
thioridazine	21
fluphenazine	21
perphenazine	21
mesoridazine	21
promazine	21
chlorprothixene	21
procyclidine	21
triflupromazine	21
orphenadrine	21
trihexyphenidyl	21
benztropine	21
loxapine	21
molindone	21
biperiden	21
trimeprazine	21
amisulpride	21
paliperidone palmitate	21
asenapine	21
ziprasidone	21
iloperidone	21
lurasidone hydrochloride	21
cariprazine	21
brexpiprazole	21
clofibrate	22
colestipol	22
dextrothyroxine	22
probucol	22
fenofibrate	22
gemfibrozil	22
tyloxapol	22
lovastatin	22
simvastatin	22
pravastatin	22
fluvastatin	22
fenofibric acid	22
atorvastatin	22
cerivastatin	22
colesevelam hydrochloride	22
pitavastatin	22
ezetimibe	22
rosuvastatin calcium	22
diphenoxylate	23
metoclopramide	23
sulfapyridine	23
barium sulfate	23
lactulose	23
loperamide	23
simethicone	23
bisacodyl	23
sodium phosphate	23
cisapride	23
ondansetron	23
olsalazine	23
granisetron	23
methylnaltrexone	23
rifaximin	23
lactitol	23
balsalazide	23
alosetron	23
tegaserod	23
prucalopride	23
alvimopan	23
lubiprostone	23
linaclotide	23
plecanatide	23
naloxegol	23
naldemedine	23
trimethoprim	24
chloramphenicol	24
rifampin	24
streptomycin	24
nalidixic acid	24
cycloserine	24
tetracycline	24
spectinomycin	24
kanamycin	24
isoniazid	24
oxytetracycline	24
chlortetracycline	24
novobiocin	24
lincomycin	24
dapsone	24
sulfadiazine	24
erythromycin	24
neomycin	24
sulfamethoxazole	24
pyrazinamide	24
aminosalicylic acid	24
fosfomycin	24
bacitracin	24
ethambutol	24
ethionamide	24
amdinocillin	24
colistin	24
capreomycin	24
viomycin	24
clofazimine	24
niacin	24
norfloxacin	24
rifapentine	24
sulfanilamide	24
bedaquiline	24
cromolyn sodium	25
oxymetazoline	25
naphazoline	25
clemastine	25
triprolidine	25
antazoline	25
brompheniramine	25
pheniramine	25
ketotifen	25
nedocromil	25
cetirizine	25
loratadine	25
azelastine	25
zileuton	25
zafirlukast	25
levocabastine	25
pemirolast	25
epinastine	25
olopatadine hydrochloride	25
tetrahydrozoline	25
acrivastine	25
dexchlorpheniramine	25
carbinoxamine	25
azatadine	25
emedastine	25
bromodiphenhydramine	25
desloratadine	25
diphenylpyraline	25
dexbrompheniramine	25
methdilazine	25
buclizine	25
montelukast	25
fexofenadine	25
bepotastine	25
omalizumab	25
levocetirizine	25
alcaftadine	25
ibuprofen	26
phenylbutazone	26
flurbiprofen	26
tolmetin	26
oxyphenbutazone	26
mefenamic acid	26
ketoprofen	26
naproxen	26
diclofenac	26
fenoprofen	26
diflunisal	26
suprofen	26
piroxicam	26
etodolac	26
ketorolac	26
nabumetone	26
carprofen	26
oxaprozin	26
meloxicam	26
rofecoxib	26
valdecoxib	26
heparin	27
tranexamic acid	27
fibrinolysin	27
warfarin	27
aspirin	27
aprotinin	27
vitamin k	27
phenprocoumon	27
aminocaproic acid	27
phenindione	27
dicumarol	27
ticlopidine	27
danaparoid	27
bivalirudin	27
reteplase	27
desirudin	27
clopidogrel	27
argatroban	27
tirofiban	27
enoxaparin	27
dalteparin	27
eptifibatide	27
abciximab	27
tinzaparin	27
cangrelor	27
tenecteplase	27
prasugrel hydrochloride	27
fondaparinux	27
dabigatran	27
rivaroxaban	27
ticagrelor	27
apixaban	27
vorapaxar	27
edoxaban	27
betrixaban	27
idarucizumab	27
ampicillin	28
amoxicillin	28
doxycycline	28
methicillin	28
tobramycin	28
oxacillin	28
cefazolin	28
vancomycin	28
metronidazole	28
clindamycin	28
amikacin	28
minocycline	28
cefuroxime	28
piperacillin	28
cefotaxime	28
ceftazidime	28
ciprofloxacin	28
azithromycin	28
imipenem	28
cilastatin	28
meropenem	28
ofloxacin	28
sulbactam	28
ceftriaxone	28
clarithromycin	28
mupirocin	28
tazobactam	28
daptomycin	28
gatifloxacin	28
cefepime	28
levofloxacin	28
linezolid	28
moxifloxacin	28
tigecycline	28
ertapenem	28
betamethasone	29
triamcinolone	29
benzoyl peroxide	29
fluocinonide	29
clobetasol	29
desoximetasone	29
etretinate	29
desonide	29
halcinonide	29
isotretinoin	29
calcipotriene	29
acitretin	29
prednicarbate	29
azelaic acid	29
adapalene	29
imiquimod	29
alclometasone dipropionate	29
halobetasol	29
amcinonide	29
diflorasone	29
tazarotene	29
pimecrolimus	29
levobunolol	30
indocyanine green	30
echothiophate iodide	30
cyclopentolate	30
timolol	30
metipranolol	30
betaxolol	30
fluprednisolone	30
carteolol	30
tropicamide	30
fluorometholone	30
brimonidine tartrate	30
dipivefrin	30
apraclonidine	30
dapiprazole	30
perflutren	30
latanoprost	30
loteprednol etabonate	30
homatropine	30
dorzolamide	30
bromfenac	30
rimexolone	30
difluprednate	30
verteporfin	30
brinzolamide	30
nepafenac	30
bimatoprost	30
travoprost	30
bevacizumab	30
tafluprost	30
pegaptanib	30
ranibizumab	30
aflibercept	30
penicillamine	31
sulfasalazine	31
azathioprine	31
prednisone	31
prednisolone	31
methylprednisolone	31
mycophenolic acid	31
hydroxychloroquine	31
cyclosporine	31
tacrolimus	31
abatacept	31
interferon beta-1b	31
interferon beta-1a	31
auranofin	31
mesalamine	31
dimethyl fumarate	31
leflunomide	31
glatiramer acetate	31
infliximab	31
daclizumab	31
etanercept	31
rituximab	31
fingolimod hydrochloride	31
basiliximab	31
peginterferon beta-1a	31
adalimumab	31
natalizumab	31
certolizumab pegol	31
tocilizumab	31
ustekinumab	31
apremilast	31
belimumab	31
teriflunomide	31
golimumab	31
ocrelizumab	31
vedolizumab	31
ixekizumab	31
secukinumab	31
brodalumab	31
guselkumab	31
parathyroid hormone	32
calcitonin	32
cholecalciferol	32
calcitriol	32
teriparatide	32
calcifediol	32
pamidronate	32
alendronate	32
zoledronic acid	32
paricalcitol	32
sevelamer	32
lanthanum carbonate	32
calcium acetate	32
cinacalcet	32
denosumab	32
hydrochlorothiazide	33
methyclothiazide	33
chlorothiazide	33
trichlormethiazide	33
hydroflumethiazide	33
chlorthalidone	33
bendroflumethiazide	33
triamterene	33
polythiazide	33
metolazone	33
torsemide	33
amantadine	34
ribavirin	34
trifluridine	34
foscarnet	34
rimantadine	34
acyclovir	34
ganciclovir	34
cidofovir	34
adefovir	34
penciclovir	34
docosanol	34
famciclovir	34
zanamivir	34
valacyclovir	34
peginterferon alfa-2a	34
oseltamivir	34
valganciclovir	34
entecavir	34
peramivir	34
peginterferon alfa-2b	34
telaprevir	34
telbivudine	34
simeprevir	34
sofosbuvir	34
ledipasvir	34
velpatasvir	34
voxilaprevir	34
pibrentasvir	34
amphotericin b	35
nystatin	35
miconazole	35
clotrimazole	35
flucytosine	35
econazole	35
natamycin	35
ketoconazole	35
fluconazole	35
terbinafine	35
itraconazole	35
posaconazole	35
voriconazole	35
anidulafungin	35
caspofungin	35
micafungin	35
chlorpropamide	36
tolbutamide	36
streptozocin	36
acetohexamide	36
glipizide	36
metformin	36
tolazamide	36
exenatide	36
acarbose	36
pioglitazone	36
miglitol	36
glimepiride	36
troglitazone	36
repaglinide	36
nateglinide	36
rosiglitazone	36
pramlintide	36
liraglutide	36
lixisenatide	36
sitagliptin phosphate	36
saxagliptin	36
alogliptin	36
linagliptin	36
dulaglutide	36
canagliflozin	36
empagliflozin	36
semaglutide	36
diatrizoate	37
metrizoic acid	37
metrizamide	37
iodipamide	37
iodamide	37
meglumine	37
chymopapain	37
iophendylate	37
iothalamate meglumine	37
ethiodized oil	37
iopamidol	37
iohexol	37
ioversol	37
iopromide	37
gadoteridol	37
gadodiamide	37
iodixanol	37
iotrolan	37
ioxilan	37
gadoterate meglumine	37
gadobutrol	37
gadofosveset trisodium	37
phenylpropanolamine	38
flavoxate	38
terazosin	38
doxazosin	38
finasteride	38
trospium chloride	38
oxybutynin	38
tamsulosin	38
alfuzosin	38
silodosin	38
tolterodine tartrate	38
darifenacin	38
dutasteride	38
solifenacin succinate	38
mirabegron	38
fesoterodine	38
vidarabine	39
thalidomide	39
pentostatin	39
cladribine	39
filgrastim	39
alemtuzumab	39
fludarabine	39
clofarabine	39
bendamustine hydrochloride	39
pegaspargase	39
nelarabine	39
gemtuzumab	39
pegfilgrastim	39
ibritumomab tiuxetan	39
lenalidomide	39
pomalidomide	39
brentuximab vedotin	39
inotuzumab ozogamicin	39
blinatumomab	39
carfilzomib	39
ofatumumab	39
obinutuzumab	39
elotuzumab	39
ixazomib	39
idelalisib	39
daratumumab	39
venetoclax	39
cimetidine	40
sucralfate	40
ranitidine	40
omeprazole	40
famotidine	40
nizatidine	40
lansoprazole	40
rabeprazole	40
pantoprazole	40
esomeprazole	40
cinoxacin	41
enoxacin	41
cefpodoxime	41
ceftibuten	41
cefprozil	41
cefdinir	41
cefixime	41
lomefloxacin	41
sparfloxacin	41
dirithromycin	41
grepafloxacin	41
loracarbef	41
cefditoren	41
trovafloxacin	41
doripenem	41
oritavancin	41
gemifloxacin	41
telithromycin	41
quinupristin	41
dalfopristin	41
dalbavancin	41
delafloxacin	41
telavancin	41
retapamulin	41
ceftolozane	41
ceftaroline fosamil	41
besifloxacin	41
avibactam	41
finafloxacin	41
omadacycline	41
cefiderocol	41
zidovudine	42
zalcitabine	42
didanosine	42
nevirapine	42
lamivudine	42
stavudine	42
saquinavir	42
ritonavir	42
tenofovir	42
delavirdine	42
indinavir	42
amprenavir	42
enfuvirtide	42
nelfinavir	42
efavirenz	42
tipranavir	42
abacavir	42
lopinavir	42
emtricitabine	42
atazanavir sulfate	42
fosamprenavir	42
etravirine	42
darunavir	42
maraviroc	42
rilpivirine	42
raltegravir potassium	42
dolutegravir	42
cobicistat	42
ciclopirox	43
tioconazole	43
naftifine	43
sertaconazole	43
sulconazole	43
butoconazole	43
terconazole	43
butenafine	43
oxiconazole	43
luliconazole	43
efinaconazole	43
tavaborole	43
sumatriptan	44
rizatriptan	44
zolmitriptan	44
naratriptan	44
frovatriptan	44
eletriptan	44
almotriptan	44
iocetamic acid	45
propoxyphene napsylate	45
talbutal	45
estrogens, conjugated synthetic b	45
interferon alfa-n3	45
thonzonium bromide	45
ubrogepant	45
ivosidenib	45

## Sheet: Misclustering
	Hierarchical Clustering				K-means Clustering
	Experiment 1	Experiment 2	Experiment 3		Experiment 1	Experiment 2	Experiment 3
	acarbose	acarbose	acarbose		acarbose	acarbose	acarbose
	acetohexamide	acetohexamide	acetohexamide		acetohexamide	acetohexamide	acetohexamide
	chlorpropamide	chlorpropamide	chlorpropamide		chlorpropamide	chlorpropamide	chlorpropamide
	exenatide	exenatide	exenatide		exenatide	exenatide	exenatide
	glimepiride	glimepiride	glimepiride		glimepiride	glimepiride	glimepiride
	glipizide	glipizide	glipizide		glipizide	glipizide	glipizide
	liraglutide	liraglutide	liraglutide		liraglutide	liraglutide	liraglutide
	metformin	metformin	metformin		metformin	metformin	metformin
	miglitol	miglitol	miglitol		miglitol	miglitol	miglitol
	nateglinide	nateglinide	nateglinide		nateglinide	nateglinide	nateglinide
	pioglitazone	pioglitazone	pioglitazone		pioglitazone	pioglitazone	pioglitazone
	pramlintide	pramlintide	pramlintide		pramlintide	pramlintide	pramlintide
	repaglinide	repaglinide	repaglinide		repaglinide	repaglinide	repaglinide
	rosiglitazone	rosiglitazone	rosiglitazone		rosiglitazone	rosiglitazone	rosiglitazone
	saxagliptin	saxagliptin	saxagliptin		saxagliptin	saxagliptin	saxagliptin
	tolazamide	tolazamide	tolazamide		tolazamide	tolazamide	tolazamide
	tolbutamide	tolbutamide	tolbutamide		tolbutamide	tolbutamide	tolbutamide
	troglitazone	troglitazone	troglitazone		troglitazone	troglitazone	troglitazone
	alogliptin	alogliptin	alogliptin		alogliptin	alogliptin	alogliptin
	linagliptin	linagliptin	linagliptin		linagliptin	linagliptin	linagliptin
	lixisenatide	lixisenatide	lixisenatide		lixisenatide	lixisenatide	lixisenatide
	dulaglutide	dulaglutide	dulaglutide		dulaglutide	dulaglutide	dulaglutide
	semaglutide	semaglutide	semaglutide		semaglutide	semaglutide	semaglutide
	canagliflozin	canagliflozin	canagliflozin		canagliflozin	canagliflozin	canagliflozin
	empagliflozin	empagliflozin	empagliflozin		empagliflozin	empagliflozin	empagliflozin
	amcinonide	amcinonide	amcinonide		amcinonide	amcinonide	amcinonide
	betamethasone	betamethasone	betamethasone		betamethasone	betamethasone	betamethasone
	clobetasol	clobetasol	clobetasol		clobetasol	clobetasol	clobetasol
	desonide	desonide	desonide		desonide	desonide	desonide
	desoximetasone	desoximetasone	desoximetasone		desoximetasone	desoximetasone	desoximetasone
	diflorasone	diflorasone	diflorasone		diflorasone	diflorasone	diflorasone
	fluocinonide	fluocinonide	fluocinonide		fluocinonide	fluocinonide	fluocinonide
	halcinonide	halcinonide	halcinonide		halcinonide	halcinonide	halcinonide
	hydrocortisone	hydrocortisone	hydrocortisone		hydrocortisone	hydrocortisone	hydrocortisone
	dexamethasone	dexamethasone	dexamethasone		dexamethasone	dexamethasone	dexamethasone
	prednicarbate	prednicarbate	prednicarbate		prednicarbate	prednicarbate	prednicarbate
	methylprednisolone	methylprednisolone	methylprednisolone		methylprednisolone	methylprednisolone	methylprednisolone
	prednisolone	prednisolone	prednisolone		prednisolone	prednisolone	prednisolone
	fluorometholone	fluorometholone	fluorometholone		fluorometholone	fluorometholone	fluorometholone
	triamcinolone	triamcinolone	triamcinolone		triamcinolone	triamcinolone	triamcinolone
	difluprednate	difluprednate	difluprednate		difluprednate	difluprednate	difluprednate
	amodiaquine	amodiaquine	amodiaquine		amodiaquine	amodiaquine	amodiaquine
	artemether	artemether	artemether		artemether	artemether	artemether
	halofantrine	halofantrine	halofantrine		halofantrine	halofantrine	halofantrine
	mefloquine	mefloquine	mefloquine		mefloquine	mefloquine	mefloquine
	primaquine	primaquine	primaquine		primaquine	primaquine	primaquine
	proguanil	proguanil	proguanil		proguanil	proguanil	proguanil
	pyrimethamine	pyrimethamine	pyrimethamine		pyrimethamine	pyrimethamine	pyrimethamine
	hydroxychloroquine	hydroxychloroquine	hydroxychloroquine		hydroxychloroquine	hydroxychloroquine	hydroxychloroquine
	artesunate	artesunate	artesunate		artesunate	artesunate	artesunate
	quinine	quinine	quinine		quinine	quinine	quinine
	chloroquine	chloroquine	chloroquine		chloroquine	chloroquine	chloroquine
	tafenoquine	tafenoquine	tafenoquine		tafenoquine	tafenoquine	tafenoquine
	celecoxib	celecoxib	celecoxib		celecoxib	celecoxib	celecoxib
	diclofenac	diclofenac	diclofenac		diclofenac	diclofenac	diclofenac
	etodolac	etodolac	etodolac		etodolac	etodolac	etodolac
	fenoprofen	fenoprofen	fenoprofen		fenoprofen	fenoprofen	fenoprofen
	flurbiprofen	flurbiprofen	flurbiprofen		flurbiprofen	flurbiprofen	flurbiprofen
	ibuprofen	ibuprofen	ibuprofen		ibuprofen	ibuprofen	ibuprofen
	ketoprofen	ketoprofen	ketoprofen		ketoprofen	ketoprofen	ketoprofen
	ketorolac	ketorolac	ketorolac		ketorolac	ketorolac	ketorolac
	mefenamic acid	mefenamic acid	mefenamic acid		mefenamic acid	mefenamic acid	mefenamic acid
	meloxicam	meloxicam	meloxicam		meloxicam	meloxicam	meloxicam
	nabumetone	nabumetone	nabumetone		nabumetone	nabumetone	nabumetone
	naproxen	naproxen	naproxen		naproxen	naproxen	naproxen
	oxaprozin	oxaprozin	oxaprozin		oxaprozin	oxaprozin	oxaprozin
	phenylbutazone	phenylbutazone	phenylbutazone		phenylbutazone	phenylbutazone	phenylbutazone
	piroxicam	piroxicam	piroxicam		piroxicam	piroxicam	piroxicam
	rofecoxib	rofecoxib	rofecoxib		rofecoxib	rofecoxib	rofecoxib
	suprofen	suprofen	suprofen		suprofen	suprofen	suprofen
	tolmetin	tolmetin	tolmetin		tolmetin	tolmetin	tolmetin
	valdecoxib	valdecoxib	valdecoxib		valdecoxib	valdecoxib	valdecoxib
	oxyphenbutazone	oxyphenbutazone	oxyphenbutazone		oxyphenbutazone	oxyphenbutazone	oxyphenbutazone
	sulindac	sulindac	sulindac		sulindac	sulindac	sulindac
	butorphanol	butorphanol	butorphanol		butorphanol	butorphanol	butorphanol
	dezocine	dezocine	dezocine		dezocine	dezocine	dezocine
	dihydrocodeine	dihydrocodeine	dihydrocodeine		dihydrocodeine	dihydrocodeine	dihydrocodeine
	hydromorphone	hydromorphone	hydromorphone		hydromorphone	hydromorphone	hydromorphone
	morphine	morphine	morphine		morphine	morphine	morphine
	nalbuphine	nalbuphine	nalbuphine		nalbuphine	nalbuphine	nalbuphine
	oxymorphone	oxymorphone	oxymorphone		oxymorphone	oxymorphone	oxymorphone
	pentazocine	pentazocine	pentazocine		pentazocine	pentazocine	pentazocine
	tramadol	tramadol	tramadol		tramadol	tramadol	tramadol
	oxycodone	oxycodone	oxycodone		oxycodone	oxycodone	oxycodone
	buprenorphine	buprenorphine	buprenorphine		buprenorphine	buprenorphine	buprenorphine
	tapentadol	tapentadol	tapentadol		tapentadol	tapentadol	tapentadol
	amikacin	amikacin	amikacin		amikacin	amikacin	amikacin
	amoxicillin	amoxicillin	amoxicillin		amoxicillin	amoxicillin	amoxicillin
	ampicillin	ampicillin	ampicillin		ampicillin	ampicillin	ampicillin
	azithromycin	azithromycin	azithromycin		azithromycin	azithromycin	azithromycin
	azlocillin	azlocillin	azlocillin		azlocillin	azlocillin	azlocillin
	aztreonam	aztreonam	aztreonam		aztreonam	aztreonam	aztreonam
	carbenicillin	carbenicillin	carbenicillin		carbenicillin	carbenicillin	carbenicillin
	cefaclor	cefaclor	cefaclor		cefaclor	cefaclor	cefaclor
	cefamandole	cefamandole	cefamandole		cefamandole	cefamandole	cefamandole
	cefazolin	cefazolin	cefazolin		cefazolin	cefazolin	cefazolin
	cefepime	cefepime	cefepime		cefepime	cefepime	cefepime
	cefmenoxime	cefmenoxime	cefmenoxime		cefmenoxime	cefmenoxime	cefmenoxime
	cefmetazole	cefmetazole	cefmetazole		cefmetazole	cefmetazole	cefmetazole
	cefoperazone	cefoperazone	cefoperazone		cefoperazone	cefoperazone	cefoperazone
	cefotaxime	cefotaxime	cefotaxime		cefotaxime	cefotaxime	cefotaxime
	cefotetan	cefotetan	cefotetan		cefotetan	cefotetan	cefotetan
	cefoxitin	cefoxitin	cefoxitin		cefoxitin	cefoxitin	cefoxitin
	ceftazidime	ceftazidime	ceftazidime		ceftazidime	ceftazidime	ceftazidime
	ceftizoxime	ceftizoxime	ceftizoxime		ceftizoxime	ceftizoxime	ceftizoxime
	ceftriaxone	ceftriaxone	ceftriaxone		ceftriaxone	ceftriaxone	ceftriaxone
	cefuroxime	cefuroxime	cefuroxime		cefuroxime	cefuroxime	cefuroxime
	ciprofloxacin	ciprofloxacin	ciprofloxacin		ciprofloxacin	ciprofloxacin	ciprofloxacin
	clarithromycin	clarithromycin	clarithromycin		clarithromycin	clarithromycin	clarithromycin
	clindamycin	clindamycin	clindamycin		clindamycin	clindamycin	clindamycin
	cloxacillin	cloxacillin	cloxacillin		cloxacillin	cloxacillin	cloxacillin
	colistin	colistin	colistin		colistin	colistin	colistin
	dicloxacillin	dicloxacillin	dicloxacillin		dicloxacillin	dicloxacillin	dicloxacillin
	fosfomycin	fosfomycin	fosfomycin		fosfomycin	fosfomycin	fosfomycin
	meropenem	meropenem	meropenem		meropenem	meropenem	meropenem
	mezlocillin	mezlocillin	mezlocillin		mezlocillin	mezlocillin	mezlocillin
	nafcillin	nafcillin	nafcillin		nafcillin	nafcillin	nafcillin
	netilmicin	netilmicin	netilmicin		netilmicin	netilmicin	netilmicin
	ofloxacin	ofloxacin	ofloxacin		ofloxacin	ofloxacin	ofloxacin
	oxacillin	oxacillin	oxacillin		oxacillin	oxacillin	oxacillin
	piperacillin	piperacillin	piperacillin		piperacillin	piperacillin	piperacillin
	sulbactam	sulbactam	sulbactam		sulbactam	sulbactam	sulbactam
	tazobactam	tazobactam	tazobactam		tazobactam	tazobactam	tazobactam
	ticarcillin	ticarcillin	ticarcillin		ticarcillin	ticarcillin	ticarcillin
	vancomycin	vancomycin	vancomycin		vancomycin	vancomycin	vancomycin
	demeclocycline	demeclocycline	demeclocycline		demeclocycline	demeclocycline	demeclocycline
	doxycycline	doxycycline	doxycycline		doxycycline	doxycycline	doxycycline
	chlortetracycline	chlortetracycline	chlortetracycline		chlortetracycline	chlortetracycline	chlortetracycline
	oxytetracycline	oxytetracycline	oxytetracycline		oxytetracycline	oxytetracycline	oxytetracycline
	tetracycline	tetracycline	tetracycline		tetracycline	tetracycline	tetracycline
	minocycline	minocycline	minocycline		minocycline	minocycline	minocycline
	tigecycline	tigecycline	tigecycline		tigecycline	tigecycline	tigecycline
	omadacycline	omadacycline	omadacycline		omadacycline	omadacycline	omadacycline
	chloramphenicol	chloramphenicol	chloramphenicol		chloramphenicol	chloramphenicol	chloramphenicol
	bacampicillin	bacampicillin	bacampicillin		bacampicillin	bacampicillin	bacampicillin
	hetacillin	hetacillin	hetacillin		hetacillin	hetacillin	hetacillin
	cefonicid	cefonicid	cefonicid		cefonicid	cefonicid	cefonicid
	cefotiam	cefotiam	cefotiam		cefotiam	cefotiam	cefotiam
	loracarbef	loracarbef	loracarbef		loracarbef	loracarbef	loracarbef
	cefprozil	cefprozil	cefprozil		cefprozil	cefprozil	cefprozil
	ceforanide	ceforanide	ceforanide		ceforanide	ceforanide	ceforanide
	cefixime	cefixime	cefixime		cefixime	cefixime	cefixime
	cefpiramide	cefpiramide	cefpiramide		cefpiramide	cefpiramide	cefpiramide
	cefpodoxime	cefpodoxime	cefpodoxime		cefpodoxime	cefpodoxime	cefpodoxime
	ceftibuten	ceftibuten	ceftibuten		ceftibuten	ceftibuten	ceftibuten
	cefdinir	cefdinir	cefdinir		cefdinir	cefdinir	cefdinir
	cefditoren	cefditoren	cefditoren		cefditoren	cefditoren	cefditoren
	ertapenem	ertapenem	ertapenem		ertapenem	ertapenem	ertapenem
	doripenem	doripenem	doripenem		doripenem	doripenem	doripenem
	ceftaroline fosamil	ceftaroline fosamil	ceftaroline fosamil		ceftaroline fosamil	ceftaroline fosamil	ceftaroline fosamil
	cefiderocol	cefiderocol	cefiderocol		cefiderocol	cefiderocol	cefiderocol
	trimethoprim	trimethoprim	trimethoprim		trimethoprim	trimethoprim	trimethoprim
	sulfamethizole	sulfamethizole	sulfamethizole		sulfamethizole	sulfamethizole	sulfamethizole
	sulfapyridine	sulfapyridine	sulfapyridine		sulfapyridine	sulfapyridine	sulfapyridine
	sulfanilamide	sulfanilamide	sulfanilamide		sulfanilamide	sulfanilamide	sulfanilamide
	sulfamethoxazole	sulfamethoxazole	sulfamethoxazole		sulfamethoxazole	sulfamethoxazole	sulfamethoxazole
	sulfadiazine	sulfadiazine	sulfadiazine		sulfadiazine	sulfadiazine	sulfadiazine
	sulfamerazine	sulfamerazine	sulfamerazine		sulfamerazine	sulfamerazine	sulfamerazine
	sulfaphenazole	sulfaphenazole	sulfaphenazole		sulfaphenazole	sulfaphenazole	sulfaphenazole
	erythromycin	erythromycin	erythromycin		erythromycin	erythromycin	erythromycin
	troleandomycin	troleandomycin	troleandomycin		troleandomycin	troleandomycin	troleandomycin
	dirithromycin	dirithromycin	dirithromycin		dirithromycin	dirithromycin	dirithromycin
	telithromycin	telithromycin	telithromycin		telithromycin	telithromycin	telithromycin
	lincomycin	lincomycin	lincomycin		lincomycin	lincomycin	lincomycin
	streptomycin	streptomycin	streptomycin		streptomycin	streptomycin	streptomycin
	tobramycin	tobramycin	tobramycin		tobramycin	tobramycin	tobramycin
	kanamycin	kanamycin	kanamycin		kanamycin	kanamycin	kanamycin
	neomycin	neomycin	neomycin		neomycin	neomycin	neomycin
	enoxacin	enoxacin	enoxacin		enoxacin	enoxacin	enoxacin
	norfloxacin	norfloxacin	norfloxacin		norfloxacin	norfloxacin	norfloxacin
	lomefloxacin	lomefloxacin	lomefloxacin		lomefloxacin	lomefloxacin	lomefloxacin
	sparfloxacin	sparfloxacin	sparfloxacin		sparfloxacin	sparfloxacin	sparfloxacin
	grepafloxacin	grepafloxacin	grepafloxacin		grepafloxacin	grepafloxacin	grepafloxacin
	levofloxacin	levofloxacin	levofloxacin		levofloxacin	levofloxacin	levofloxacin
	trovafloxacin	trovafloxacin	trovafloxacin		trovafloxacin	trovafloxacin	trovafloxacin
	moxifloxacin	moxifloxacin	moxifloxacin		moxifloxacin	moxifloxacin	moxifloxacin
	gemifloxacin	gemifloxacin	gemifloxacin		gemifloxacin	gemifloxacin	gemifloxacin
	gatifloxacin	gatifloxacin	gatifloxacin		gatifloxacin	gatifloxacin	gatifloxacin
	delafloxacin	delafloxacin	delafloxacin		delafloxacin	delafloxacin	delafloxacin
	nalidixic acid	nalidixic acid	nalidixic acid		nalidixic acid	nalidixic acid	nalidixic acid
	cinoxacin	cinoxacin	cinoxacin		cinoxacin	cinoxacin	cinoxacin
	telavancin	telavancin	telavancin		telavancin	telavancin	telavancin
	dalbavancin	dalbavancin	dalbavancin		dalbavancin	dalbavancin	dalbavancin
	oritavancin	oritavancin	oritavancin		oritavancin	oritavancin	oritavancin
	metronidazole	metronidazole	metronidazole		metronidazole	metronidazole	metronidazole
	tinidazole	tinidazole	tinidazole		tinidazole	tinidazole	tinidazole
	nitrofurantoin	nitrofurantoin	nitrofurantoin		nitrofurantoin	nitrofurantoin	nitrofurantoin
	spectinomycin	spectinomycin	spectinomycin		spectinomycin	spectinomycin	spectinomycin
	methenamine	methenamine	methenamine		methenamine	methenamine	methenamine
	linezolid	linezolid	linezolid		linezolid	linezolid	linezolid
	daptomycin	daptomycin	daptomycin		daptomycin	daptomycin	daptomycin
	bacitracin	bacitracin	bacitracin		bacitracin	bacitracin	bacitracin
	altretamine	altretamine	altretamine		altretamine	altretamine	altretamine
	asparaginase	asparaginase	asparaginase		asparaginase	asparaginase	asparaginase
	bleomycin	bleomycin	bleomycin		bleomycin	bleomycin	bleomycin
	busulfan	busulfan	busulfan		busulfan	busulfan	busulfan
	capecitabine	capecitabine	capecitabine		capecitabine	capecitabine	capecitabine
	carboplatin	carboplatin	carboplatin		carboplatin	carboplatin	carboplatin
	chlorambucil	chlorambucil	chlorambucil		chlorambucil	chlorambucil	chlorambucil
	cisplatin	cisplatin	cisplatin		cisplatin	cisplatin	cisplatin
	cladribine	cladribine	cladribine		cladribine	cladribine	cladribine
	clofarabine	clofarabine	clofarabine		clofarabine	clofarabine	clofarabine
	cyclophosphamide	cyclophosphamide	cyclophosphamide		cyclophosphamide	cyclophosphamide	cyclophosphamide
	cytarabine	cytarabine	cytarabine		cytarabine	cytarabine	cytarabine
	dacarbazine	dacarbazine	dacarbazine		dacarbazine	dacarbazine	dacarbazine
	daunorubicin	daunorubicin	daunorubicin		daunorubicin	daunorubicin	daunorubicin
	docetaxel	docetaxel	docetaxel		docetaxel	docetaxel	docetaxel
	doxorubicin	doxorubicin	doxorubicin		doxorubicin	doxorubicin	doxorubicin
	epirubicin	epirubicin	epirubicin		epirubicin	epirubicin	epirubicin
	etoposide	etoposide	etoposide		etoposide	etoposide	etoposide
	floxuridine	floxuridine	floxuridine		floxuridine	floxuridine	floxuridine
	fludarabine	fludarabine	fludarabine		fludarabine	fludarabine	fludarabine
	fluorouracil	fluorouracil	fluorouracil		fluorouracil	fluorouracil	fluorouracil
	gemcitabine	gemcitabine	gemcitabine		gemcitabine	gemcitabine	gemcitabine
	idarubicin	idarubicin	idarubicin		idarubicin	idarubicin	idarubicin
	ifosfamide	ifosfamide	ifosfamide		ifosfamide	ifosfamide	ifosfamide
	inotuzumab ozogamicin	inotuzumab ozogamicin	inotuzumab ozogamicin		inotuzumab ozogamicin	inotuzumab ozogamicin	inotuzumab ozogamicin
	irinotecan	irinotecan	irinotecan		irinotecan	irinotecan	irinotecan
	lomustine	lomustine	lomustine		lomustine	lomustine	lomustine
	melphalan	melphalan	melphalan		melphalan	melphalan	melphalan
	mercaptopurine	mercaptopurine	mercaptopurine		mercaptopurine	mercaptopurine	mercaptopurine
	mitomycin	mitomycin	mitomycin		mitomycin	mitomycin	mitomycin
	mitoxantrone	mitoxantrone	mitoxantrone		mitoxantrone	mitoxantrone	mitoxantrone
	nelarabine	nelarabine	nelarabine		nelarabine	nelarabine	nelarabine
	oxaliplatin	oxaliplatin	oxaliplatin		oxaliplatin	oxaliplatin	oxaliplatin
	pemetrexed	pemetrexed	pemetrexed		pemetrexed	pemetrexed	pemetrexed
	procarbazine	procarbazine	procarbazine		procarbazine	procarbazine	procarbazine
	temozolomide	temozolomide	temozolomide		temozolomide	temozolomide	temozolomide
	teniposide	teniposide	teniposide		teniposide	teniposide	teniposide
	thiotepa	thiotepa	thiotepa		thiotepa	thiotepa	thiotepa
	topotecan	topotecan	topotecan		topotecan	topotecan	topotecan
	vinblastine	vinblastine	vinblastine		vinblastine	vinblastine	vinblastine
	vincristine	vincristine	vincristine		vincristine	vincristine	vincristine
	carmustine	carmustine	carmustine		carmustine	carmustine	carmustine
	streptozocin	streptozocin	streptozocin		streptozocin	streptozocin	streptozocin
	pipobroman	pipobroman	pipobroman		pipobroman	pipobroman	pipobroman
	methotrexate	methotrexate	methotrexate		methotrexate	methotrexate	methotrexate
	azacitidine	azacitidine	azacitidine		azacitidine	azacitidine	azacitidine
	decitabine	decitabine	decitabine		decitabine	decitabine	decitabine
	vinorelbine	vinorelbine	vinorelbine		vinorelbine	vinorelbine	vinorelbine
	paclitaxel	paclitaxel	paclitaxel		paclitaxel	paclitaxel	paclitaxel
	cabazitaxel	cabazitaxel	cabazitaxel		cabazitaxel	cabazitaxel	cabazitaxel
	trabectedin	trabectedin	trabectedin		trabectedin	trabectedin	trabectedin
	dactinomycin	dactinomycin	dactinomycin		dactinomycin	dactinomycin	dactinomycin
	valrubicin	valrubicin	valrubicin		valrubicin	valrubicin	valrubicin
	plicamycin	plicamycin	plicamycin		plicamycin	plicamycin	plicamycin
	ixabepilone	ixabepilone	ixabepilone		ixabepilone	ixabepilone	ixabepilone
	dasatinib	dasatinib	dasatinib		dasatinib	dasatinib	dasatinib
	bosutinib	bosutinib	bosutinib		bosutinib	bosutinib	bosutinib
	ponatinib	ponatinib	ponatinib		ponatinib	ponatinib	ponatinib
	gefitinib	gefitinib	gefitinib		gefitinib	gefitinib	gefitinib
	afatinib	afatinib	afatinib		afatinib	afatinib	afatinib
	osimertinib	osimertinib	osimertinib		osimertinib	osimertinib	osimertinib
	vemurafenib	vemurafenib	vemurafenib		vemurafenib	vemurafenib	vemurafenib
	dabrafenib	dabrafenib	dabrafenib		dabrafenib	dabrafenib	dabrafenib
	encorafenib	encorafenib	encorafenib		encorafenib	encorafenib	encorafenib
	crizotinib	crizotinib	crizotinib		crizotinib	crizotinib	crizotinib
	ceritinib	ceritinib	ceritinib		ceritinib	ceritinib	ceritinib
	trametinib	trametinib	trametinib		trametinib	trametinib	trametinib
	palbociclib	palbociclib	palbociclib		palbociclib	palbociclib	palbociclib
	ribociclib	ribociclib	ribociclib		ribociclib	ribociclib	ribociclib
	temsirolimus	temsirolimus	temsirolimus		temsirolimus	temsirolimus	temsirolimus
	everolimus	everolimus	everolimus		everolimus	everolimus	everolimus
	lapatinib	lapatinib	lapatinib		lapatinib	lapatinib	lapatinib
	axitinib	axitinib	axitinib		axitinib	axitinib	axitinib
	tivozanib	tivozanib	tivozanib		tivozanib	tivozanib	tivozanib
	acalabrutinib	acalabrutinib	acalabrutinib		acalabrutinib	acalabrutinib	acalabrutinib
	idelalisib	idelalisib	idelalisib		idelalisib	idelalisib	idelalisib
	sunitinib	sunitinib	sunitinib		sunitinib	sunitinib	sunitinib
	sorafenib	sorafenib	sorafenib		sorafenib	sorafenib	sorafenib
	pazopanib	pazopanib	pazopanib		pazopanib	pazopanib	pazopanib
	regorafenib	regorafenib	regorafenib		regorafenib	regorafenib	regorafenib
	cabozantinib	cabozantinib	cabozantinib		cabozantinib	cabozantinib	cabozantinib
	lenvatinib	lenvatinib	lenvatinib		lenvatinib	lenvatinib	lenvatinib
	nintedanib	nintedanib	nintedanib		nintedanib	nintedanib	nintedanib
	midostaurin	midostaurin	midostaurin		midostaurin	midostaurin	midostaurin
	gilteritinib	gilteritinib	gilteritinib		gilteritinib	gilteritinib	gilteritinib
	entrectinib	entrectinib	entrectinib		entrectinib	entrectinib	entrectinib
	capmatinib	capmatinib	capmatinib		capmatinib	capmatinib	capmatinib
	rituximab	rituximab	rituximab		rituximab	rituximab	rituximab
	ofatumumab	ofatumumab	ofatumumab		ofatumumab	ofatumumab	ofatumumab
	daratumumab	daratumumab	daratumumab		daratumumab	daratumumab	daratumumab
	trastuzumab	trastuzumab	trastuzumab		trastuzumab	trastuzumab	trastuzumab
	pertuzumab	pertuzumab	pertuzumab		pertuzumab	pertuzumab	pertuzumab
	cetuximab	cetuximab	cetuximab		cetuximab	cetuximab	cetuximab
	panitumumab	panitumumab	panitumumab		panitumumab	panitumumab	panitumumab
	nivolumab	nivolumab	nivolumab		nivolumab	nivolumab	nivolumab
	pembrolizumab	pembrolizumab	pembrolizumab		pembrolizumab	pembrolizumab	pembrolizumab
	durvalumab	durvalumab	durvalumab		durvalumab	durvalumab	durvalumab
	avelumab	avelumab	avelumab		avelumab	avelumab	avelumab
	atezolizumab	atezolizumab	atezolizumab		atezolizumab	atezolizumab	atezolizumab
	bevacizumab	bevacizumab	bevacizumab		bevacizumab	bevacizumab	bevacizumab
	ramucirumab	ramucirumab	ramucirumab		ramucirumab	ramucirumab	ramucirumab
	ipilimumab	ipilimumab	ipilimumab		ipilimumab	ipilimumab	ipilimumab
	brentuximab vedotin	brentuximab vedotin	brentuximab vedotin		brentuximab vedotin	brentuximab vedotin	brentuximab vedotin
	blinatumomab	blinatumomab	blinatumomab		blinatumomab	blinatumomab	blinatumomab
	elotuzumab	elotuzumab	elotuzumab		elotuzumab	elotuzumab	elotuzumab
	olaratumab	olaratumab	olaratumab		olaratumab	olaratumab	olaratumab
	tretinoin	tretinoin	tretinoin		tretinoin	tretinoin	tretinoin
	alitretinoin	alitretinoin	alitretinoin		alitretinoin	alitretinoin	alitretinoin
	bexarotene	bexarotene	bexarotene		bexarotene	bexarotene	bexarotene
	bortezomib	bortezomib	bortezomib		bortezomib	bortezomib	bortezomib
	carfilzomib	carfilzomib	carfilzomib		carfilzomib	carfilzomib	carfilzomib
	ixazomib	ixazomib	ixazomib		ixazomib	ixazomib	ixazomib
	vorinostat	vorinostat	vorinostat		vorinostat	vorinostat	vorinostat
	romidepsin	romidepsin	romidepsin		romidepsin	romidepsin	romidepsin
	panobinostat	panobinostat	panobinostat		panobinostat	panobinostat	panobinostat
	belinostat	belinostat	belinostat		belinostat	belinostat	belinostat
	olaparib	olaparib	olaparib		olaparib	olaparib	olaparib
	niraparib	niraparib	niraparib		niraparib	niraparib	niraparib
	rucaparib	rucaparib	rucaparib		rucaparib	rucaparib	rucaparib
	talazoparib	talazoparib	talazoparib		talazoparib	talazoparib	talazoparib
	pentostatin	pentostatin	pentostatin		pentostatin	pentostatin	pentostatin
	masoprocol	masoprocol	masoprocol		masoprocol	masoprocol	masoprocol
	estramustine	estramustine	estramustine		estramustine	estramustine	estramustine
	mitotane	mitotane	mitotane		mitotane	mitotane	mitotane
	pegaspargase	pegaspargase	pegaspargase		pegaspargase	pegaspargase	pegaspargase
	arsenic trioxide	arsenic trioxide	arsenic trioxide		arsenic trioxide	arsenic trioxide	arsenic trioxide
	denileukin diftitox	denileukin diftitox	denileukin diftitox		denileukin diftitox	denileukin diftitox	denileukin diftitox
	anagrelide	anagrelide	anagrelide		anagrelide	anagrelide	anagrelide
	eribulin	eribulin	eribulin		eribulin	eribulin	eribulin
	aflibercept	aflibercept	aflibercept		aflibercept	aflibercept	aflibercept
	venetoclax	venetoclax	venetoclax		venetoclax	venetoclax	venetoclax
	ivosidenib	ivosidenib	ivosidenib		ivosidenib	ivosidenib	ivosidenib
	abacavir	abacavir	abacavir		abacavir	abacavir	abacavir
	amprenavir	amprenavir	amprenavir		amprenavir	amprenavir	amprenavir
	darunavir	darunavir	darunavir		darunavir	darunavir	darunavir
	delavirdine	delavirdine	delavirdine		delavirdine	delavirdine	delavirdine
	didanosine	didanosine	didanosine		didanosine	didanosine	didanosine
	efavirenz	efavirenz	efavirenz		efavirenz	efavirenz	efavirenz
	emtricitabine	emtricitabine	emtricitabine		emtricitabine	emtricitabine	emtricitabine
	enfuvirtide	enfuvirtide	enfuvirtide		enfuvirtide	enfuvirtide	enfuvirtide
	fosamprenavir	fosamprenavir	fosamprenavir		fosamprenavir	fosamprenavir	fosamprenavir
	indinavir	indinavir	indinavir		indinavir	indinavir	indinavir
	maraviroc	maraviroc	maraviroc		maraviroc	maraviroc	maraviroc
	nelfinavir	nelfinavir	nelfinavir		nelfinavir	nelfinavir	nelfinavir
	nevirapine	nevirapine	nevirapine		nevirapine	nevirapine	nevirapine
	rilpivirine	rilpivirine	rilpivirine		rilpivirine	rilpivirine	rilpivirine
	ritonavir	ritonavir	ritonavir		ritonavir	ritonavir	ritonavir
	stavudine	stavudine	stavudine		stavudine	stavudine	stavudine
	tipranavir	tipranavir	tipranavir		tipranavir	tipranavir	tipranavir
	zidovudine	zidovudine	zidovudine		zidovudine	zidovudine	zidovudine
	cidofovir	cidofovir	cidofovir		cidofovir	cidofovir	cidofovir
	famciclovir	famciclovir	famciclovir		famciclovir	famciclovir	famciclovir
	foscarnet	foscarnet	foscarnet		foscarnet	foscarnet	foscarnet
	ganciclovir	ganciclovir	ganciclovir		ganciclovir	ganciclovir	ganciclovir
	oseltamivir	oseltamivir	oseltamivir		oseltamivir	oseltamivir	oseltamivir
	penciclovir	penciclovir	penciclovir		penciclovir	penciclovir	penciclovir
	peramivir	peramivir	peramivir		peramivir	peramivir	peramivir
	ribavirin	ribavirin	ribavirin		ribavirin	ribavirin	ribavirin
	rimantadine	rimantadine	rimantadine		rimantadine	rimantadine	rimantadine
	telaprevir	telaprevir	telaprevir		telaprevir	telaprevir	telaprevir
	valganciclovir	valganciclovir	valganciclovir		valganciclovir	valganciclovir	valganciclovir
	zanamivir	zanamivir	zanamivir		zanamivir	zanamivir	zanamivir
	idoxuridine	idoxuridine	idoxuridine		idoxuridine	idoxuridine	idoxuridine
	vidarabine	vidarabine	vidarabine		vidarabine	vidarabine	vidarabine
	saquinavir	saquinavir	saquinavir		saquinavir	saquinavir	saquinavir
	zalcitabine	zalcitabine	zalcitabine		zalcitabine	zalcitabine	zalcitabine
	lamivudine	lamivudine	lamivudine		lamivudine	lamivudine	lamivudine
	entecavir	entecavir	entecavir		entecavir	entecavir	entecavir
	telbivudine	telbivudine	telbivudine		telbivudine	telbivudine	telbivudine
	etravirine	etravirine	etravirine		etravirine	etravirine	etravirine
	dolutegravir	dolutegravir	dolutegravir		dolutegravir	dolutegravir	dolutegravir
	simeprevir	simeprevir	simeprevir		simeprevir	simeprevir	simeprevir
	sofosbuvir	sofosbuvir	sofosbuvir		sofosbuvir	sofosbuvir	sofosbuvir
	aminophylline	aminophylline	aminophylline		aminophylline	aminophylline	aminophylline
	bitolterol	bitolterol	bitolterol		bitolterol	bitolterol	bitolterol
	budesonide	budesonide	budesonide		budesonide	budesonide	budesonide
	ciclesonide	ciclesonide	ciclesonide		ciclesonide	ciclesonide	ciclesonide
	flunisolide	flunisolide	flunisolide		flunisolide	flunisolide	flunisolide
	fluticasone	fluticasone	fluticasone		fluticasone	fluticasone	fluticasone
	mepolizumab	mepolizumab	mepolizumab		mepolizumab	mepolizumab	mepolizumab
	montelukast	montelukast	montelukast		montelukast	montelukast	montelukast
	omalizumab	omalizumab	omalizumab		omalizumab	omalizumab	omalizumab
	pirbuterol	pirbuterol	pirbuterol		pirbuterol	pirbuterol	pirbuterol
	roflumilast	roflumilast	roflumilast		roflumilast	roflumilast	roflumilast
	terbutaline	terbutaline	terbutaline		terbutaline	terbutaline	terbutaline
	theophylline	theophylline	theophylline		theophylline	theophylline	theophylline
	tiotropium bromide	tiotropium bromide	tiotropium bromide		tiotropium bromide	tiotropium bromide	tiotropium bromide
	zafirlukast	zafirlukast	zafirlukast		zafirlukast	zafirlukast	zafirlukast
	indacaterol	indacaterol	indacaterol		indacaterol	indacaterol	indacaterol
	olodaterol	olodaterol	olodaterol		olodaterol	olodaterol	olodaterol
	aclidinium bromide	aclidinium bromide	aclidinium bromide		aclidinium bromide	aclidinium bromide	aclidinium bromide
	nedocromil	nedocromil	nedocromil		nedocromil	nedocromil	nedocromil
	ephedrine	ephedrine	ephedrine		ephedrine	ephedrine	ephedrine
	amlexanox	amlexanox	amlexanox		amlexanox	amlexanox	amlexanox
	reslizumab	reslizumab	reslizumab		reslizumab	reslizumab	reslizumab
	benralizumab	benralizumab	benralizumab		benralizumab	benralizumab	benralizumab
	amantadine	amantadine	amantadine		amantadine	amantadine	amantadine
	entacapone	entacapone	entacapone		entacapone	entacapone	entacapone
	istradefylline	istradefylline	istradefylline		istradefylline	istradefylline	istradefylline
	levodopa	levodopa	levodopa		levodopa	levodopa	levodopa
	pergolide	pergolide	pergolide		pergolide	pergolide	pergolide
	pramipexole	pramipexole	pramipexole		pramipexole	pramipexole	pramipexole
	rasagiline	rasagiline	rasagiline		rasagiline	rasagiline	rasagiline
	ropinirole	ropinirole	ropinirole		ropinirole	ropinirole	ropinirole
	rotigotine	rotigotine	rotigotine		rotigotine	rotigotine	rotigotine
	safinamide	safinamide	safinamide		safinamide	safinamide	safinamide
	selegiline	selegiline	selegiline		selegiline	selegiline	selegiline
	tolcapone	tolcapone	tolcapone		tolcapone	tolcapone	tolcapone
	trihexyphenidyl	trihexyphenidyl	trihexyphenidyl		trihexyphenidyl	trihexyphenidyl	trihexyphenidyl
	biperiden	biperiden	biperiden		biperiden	biperiden	biperiden
	procyclidine	procyclidine	procyclidine		procyclidine	procyclidine	procyclidine
	bromocriptine	bromocriptine	bromocriptine		bromocriptine	bromocriptine	bromocriptine
	cabergoline	cabergoline	cabergoline		cabergoline	cabergoline	cabergoline
	apomorphine	apomorphine	apomorphine		apomorphine	apomorphine	apomorphine
	opicapone	opicapone	opicapone		opicapone	opicapone	opicapone
	amitriptyline	amitriptyline	amitriptyline		amitriptyline	amitriptyline	amitriptyline
	amoxapine	amoxapine	amoxapine		amoxapine	amoxapine	amoxapine
	bupropion	bupropion	bupropion		bupropion	bupropion	bupropion
	citalopram	citalopram	citalopram		citalopram	citalopram	citalopram
	fluoxetine	fluoxetine	fluoxetine		fluoxetine	fluoxetine	fluoxetine
	fluvoxamine	fluvoxamine	fluvoxamine		fluvoxamine	fluvoxamine	fluvoxamine
	maprotiline	maprotiline	maprotiline		maprotiline	maprotiline	maprotiline
	mirtazapine	mirtazapine	mirtazapine		mirtazapine	mirtazapine	mirtazapine
	nefazodone	nefazodone	nefazodone		nefazodone	nefazodone	nefazodone
	nortriptyline	nortriptyline	nortriptyline		nortriptyline	nortriptyline	nortriptyline
	paroxetine	paroxetine	paroxetine		paroxetine	paroxetine	paroxetine
	protriptyline	protriptyline	protriptyline		protriptyline	protriptyline	protriptyline
	sertraline	sertraline	sertraline		sertraline	sertraline	sertraline
	trazodone	trazodone	trazodone		trazodone	trazodone	trazodone
	trimipramine	trimipramine	trimipramine		trimipramine	trimipramine	trimipramine
	desipramine	desipramine	desipramine		desipramine	desipramine	desipramine
	imipramine	imipramine	imipramine		imipramine	imipramine	imipramine
	clomipramine	clomipramine	clomipramine		clomipramine	clomipramine	clomipramine
	doxepin	doxepin	doxepin		doxepin	doxepin	doxepin
	isocarboxazid	isocarboxazid	isocarboxazid		isocarboxazid	isocarboxazid	isocarboxazid
	phenelzine	phenelzine	phenelzine		phenelzine	phenelzine	phenelzine
	tranylcypromine	tranylcypromine	tranylcypromine		tranylcypromine	tranylcypromine	tranylcypromine
	viloxazine	viloxazine	viloxazine		viloxazine	viloxazine	viloxazine
	milnacipran	milnacipran	milnacipran		milnacipran	milnacipran	milnacipran
	vortioxetine	vortioxetine	vortioxetine		vortioxetine	vortioxetine	vortioxetine
	methylphenidate	methylphenidate	methylphenidate		methylphenidate	methylphenidate	methylphenidate
	pemoline	pemoline	pemoline		pemoline	pemoline	pemoline
	modafinil	modafinil	modafinil		modafinil	modafinil	modafinil
	caffeine	caffeine	caffeine		caffeine	caffeine	caffeine
	tacrine	tacrine	tacrine		tacrine	tacrine	tacrine
	donepezil	donepezil	donepezil		donepezil	donepezil	donepezil
	rivastigmine	rivastigmine	rivastigmine		rivastigmine	rivastigmine	rivastigmine
	galantamine	galantamine	galantamine		galantamine	galantamine	galantamine
	memantine	memantine	memantine		memantine	memantine	memantine
	abciximab	abciximab	abciximab		abciximab	abciximab	abciximab
	argatroban	argatroban	argatroban		argatroban	argatroban	argatroban
	bivalirudin	bivalirudin	bivalirudin		bivalirudin	bivalirudin	bivalirudin
	cilostazol	cilostazol	cilostazol		cilostazol	cilostazol	cilostazol
	clopidogrel	clopidogrel	clopidogrel		clopidogrel	clopidogrel	clopidogrel
	dalteparin	dalteparin	dalteparin		dalteparin	dalteparin	dalteparin
	danaparoid	danaparoid	danaparoid		danaparoid	danaparoid	danaparoid
	defibrotide	defibrotide	defibrotide		defibrotide	defibrotide	defibrotide
	desirudin	desirudin	desirudin		desirudin	desirudin	desirudin
	dipyridamole	dipyridamole	dipyridamole		dipyridamole	dipyridamole	dipyridamole
	enoxaparin	enoxaparin	enoxaparin		enoxaparin	enoxaparin	enoxaparin
	eptifibatide	eptifibatide	eptifibatide		eptifibatide	eptifibatide	eptifibatide
	fibrinolysin	fibrinolysin	fibrinolysin		fibrinolysin	fibrinolysin	fibrinolysin
	fondaparinux	fondaparinux	fondaparinux		fondaparinux	fondaparinux	fondaparinux
	heparin	heparin	heparin		heparin	heparin	heparin
	phenindione	phenindione	phenindione		phenindione	phenindione	phenindione
	phenprocoumon	phenprocoumon	phenprocoumon		phenprocoumon	phenprocoumon	phenprocoumon
	reteplase	reteplase	reteplase		reteplase	reteplase	reteplase
	tenecteplase	tenecteplase	tenecteplase		tenecteplase	tenecteplase	tenecteplase
	tinzaparin	tinzaparin	tinzaparin		tinzaparin	tinzaparin	tinzaparin
	tirofiban	tirofiban	tirofiban		tirofiban	tirofiban	tirofiban
	warfarin	warfarin	warfarin		warfarin	warfarin	warfarin
	ticlopidine	ticlopidine	ticlopidine		ticlopidine	ticlopidine	ticlopidine
	epoprostenol	epoprostenol	epoprostenol		epoprostenol	epoprostenol	epoprostenol
	iloprost	iloprost	iloprost		iloprost	iloprost	iloprost
	treprostinil	treprostinil	treprostinil		treprostinil	treprostinil	treprostinil
	ticagrelor	ticagrelor	ticagrelor		ticagrelor	ticagrelor	ticagrelor
	cangrelor	cangrelor	cangrelor		cangrelor	cangrelor	cangrelor
	vorapaxar	vorapaxar	vorapaxar		vorapaxar	vorapaxar	vorapaxar
	selexipag	selexipag	selexipag		selexipag	selexipag	selexipag
	rivaroxaban	rivaroxaban	rivaroxaban		rivaroxaban	rivaroxaban	rivaroxaban
	apixaban	apixaban	apixaban		apixaban	apixaban	apixaban
	atorvastatin	atorvastatin	atorvastatin		atorvastatin	atorvastatin	atorvastatin
	cerivastatin	cerivastatin	cerivastatin		cerivastatin	cerivastatin	cerivastatin
	clofibrate	clofibrate	clofibrate		clofibrate	clofibrate	clofibrate
	colestipol	colestipol	colestipol		colestipol	colestipol	colestipol
	dextrothyroxine	dextrothyroxine	dextrothyroxine		dextrothyroxine	dextrothyroxine	dextrothyroxine
	ezetimibe	ezetimibe	ezetimibe		ezetimibe	ezetimibe	ezetimibe
	fenofibrate	fenofibrate	fenofibrate		fenofibrate	fenofibrate	fenofibrate
	fluvastatin	fluvastatin	fluvastatin		fluvastatin	fluvastatin	fluvastatin
	gemfibrozil	gemfibrozil	gemfibrozil		gemfibrozil	gemfibrozil	gemfibrozil
	lovastatin	lovastatin	lovastatin		lovastatin	lovastatin	lovastatin
	pitavastatin	pitavastatin	pitavastatin		pitavastatin	pitavastatin	pitavastatin
	pravastatin	pravastatin	pravastatin		pravastatin	pravastatin	pravastatin
	probucol	probucol	probucol		probucol	probucol	probucol
	simvastatin	simvastatin	simvastatin		simvastatin	simvastatin	simvastatin
	mipomersen	mipomersen	mipomersen		mipomersen	mipomersen	mipomersen
	evolocumab	evolocumab	evolocumab		evolocumab	evolocumab	evolocumab
	alirocumab	alirocumab	alirocumab		alirocumab	alirocumab	alirocumab
	chlorpromazine	chlorpromazine	chlorpromazine		chlorpromazine	chlorpromazine	chlorpromazine
	triflupromazine	triflupromazine	triflupromazine		triflupromazine	triflupromazine	triflupromazine
	promazine	promazine	promazine		promazine	promazine	promazine
	acetophenazine	acetophenazine	acetophenazine		acetophenazine	acetophenazine	acetophenazine
	fluphenazine	fluphenazine	fluphenazine		fluphenazine	fluphenazine	fluphenazine
	perphenazine	perphenazine	perphenazine		perphenazine	perphenazine	perphenazine
	thioridazine	thioridazine	thioridazine		thioridazine	thioridazine	thioridazine
	mesoridazine	mesoridazine	mesoridazine		mesoridazine	mesoridazine	mesoridazine
	haloperidol	haloperidol	haloperidol		haloperidol	haloperidol	haloperidol
	droperidol	droperidol	droperidol		droperidol	droperidol	droperidol
	molindone	molindone	molindone		molindone	molindone	molindone
	ziprasidone	ziprasidone	ziprasidone		ziprasidone	ziprasidone	ziprasidone
	chlorprothixene	chlorprothixene	chlorprothixene		chlorprothixene	chlorprothixene	chlorprothixene
	pimozide	pimozide	pimozide		pimozide	pimozide	pimozide
	olanzapine	olanzapine	olanzapine		olanzapine	olanzapine	olanzapine
	loxapine	loxapine	loxapine		loxapine	loxapine	loxapine
	clozapine	clozapine	clozapine		clozapine	clozapine	clozapine
	asenapine	asenapine	asenapine		asenapine	asenapine	asenapine
	amisulpride	amisulpride	amisulpride		amisulpride	amisulpride	amisulpride
	risperidone	risperidone	risperidone		risperidone	risperidone	risperidone
	aripiprazole	aripiprazole	aripiprazole		aripiprazole	aripiprazole	aripiprazole
	iloperidone	iloperidone	iloperidone		iloperidone	iloperidone	iloperidone
	prochlorperazine	prochlorperazine	prochlorperazine		prochlorperazine	prochlorperazine	prochlorperazine
	trifluoperazine	trifluoperazine	trifluoperazine		trifluoperazine	trifluoperazine	trifluoperazine
	cariprazine	cariprazine	cariprazine		cariprazine	cariprazine	cariprazine
	brexpiprazole	brexpiprazole	brexpiprazole		brexpiprazole	brexpiprazole	brexpiprazole
	pimavanserin	pimavanserin	pimavanserin		pimavanserin	pimavanserin	pimavanserin
	penbutolol	penbutolol	penbutolol		penbutolol	penbutolol	penbutolol
	pindolol	pindolol	pindolol		pindolol	pindolol	pindolol
	propranolol	propranolol	propranolol		propranolol	propranolol	propranolol
	oxprenolol	oxprenolol	oxprenolol		oxprenolol	oxprenolol	oxprenolol
	carteolol	carteolol	carteolol		carteolol	carteolol	carteolol
	timolol	timolol	timolol		timolol	timolol	timolol
	nadolol	nadolol	nadolol		nadolol	nadolol	nadolol
	sotalol	sotalol	sotalol		sotalol	sotalol	sotalol
	metoprolol	metoprolol	metoprolol		metoprolol	metoprolol	metoprolol
	atenolol	atenolol	atenolol		atenolol	atenolol	atenolol
	acebutolol	acebutolol	acebutolol		acebutolol	acebutolol	acebutolol
	betaxolol	betaxolol	betaxolol		betaxolol	betaxolol	betaxolol
	bisoprolol	bisoprolol	bisoprolol		bisoprolol	bisoprolol	bisoprolol
	esmolol	esmolol	esmolol		esmolol	esmolol	esmolol
	labetalol	labetalol	labetalol		labetalol	labetalol	labetalol
	carvedilol	carvedilol	carvedilol		carvedilol	carvedilol	carvedilol
	nebivolol	nebivolol	nebivolol		nebivolol	nebivolol	nebivolol
	dolasetron	dolasetron	dolasetron		dolasetron	dolasetron	dolasetron
	granisetron	granisetron	granisetron		granisetron	granisetron	granisetron
	ondansetron	ondansetron	ondansetron		ondansetron	ondansetron	ondansetron
	palonosetron	palonosetron	palonosetron		palonosetron	palonosetron	palonosetron
	scopolamine	scopolamine	scopolamine		scopolamine	scopolamine	scopolamine
	dronabinol	dronabinol	dronabinol		dronabinol	dronabinol	dronabinol
	nabilone	nabilone	nabilone		nabilone	nabilone	nabilone
	aprepitant	aprepitant	aprepitant		aprepitant	aprepitant	aprepitant
	metrizoic acid	metrizoic acid	metrizoic acid		metrizoic acid	metrizoic acid	metrizoic acid
	iodamide	iodamide	iodamide		iodamide	iodamide	iodamide
	metrizamide	metrizamide	metrizamide		metrizamide	metrizamide	metrizamide
	iohexol	iohexol	iohexol		iohexol	iohexol	iohexol
	iopamidol	iopamidol	iopamidol		iopamidol	iopamidol	iopamidol
	iopromide	iopromide	iopromide		iopromide	iopromide	iopromide
	iotrolan	iotrolan	iotrolan		iotrolan	iotrolan	iotrolan
	ioversol	ioversol	ioversol		ioversol	ioversol	ioversol
	iodixanol	iodixanol	iodixanol		iodixanol	iodixanol	iodixanol
	ioxilan	ioxilan	ioxilan		ioxilan	ioxilan	ioxilan
	iopanoic acid	iopanoic acid	iopanoic acid		iopanoic acid	iopanoic acid	iopanoic acid
	propyliodone	propyliodone	propyliodone		propyliodone	propyliodone	propyliodone
	gadodiamide	gadodiamide	gadodiamide		gadodiamide	gadodiamide	gadodiamide
	gadoteridol	gadoteridol	gadoteridol		gadoteridol	gadoteridol	gadoteridol
	gadoversetamide	gadoversetamide	gadoversetamide		gadoversetamide	gadoversetamide	gadoversetamide
	ferric ammonium citrate	ferric ammonium citrate	ferric ammonium citrate		ferric ammonium citrate	ferric ammonium citrate	ferric ammonium citrate
	gadobutrol	gadobutrol	gadobutrol		gadobutrol	gadobutrol	gadobutrol
	ferumoxsil	ferumoxsil	ferumoxsil		ferumoxsil	ferumoxsil	ferumoxsil
	perflubron	perflubron	perflubron		perflubron	perflubron	perflubron
	iocetamic acid	iocetamic acid	iocetamic acid		iocetamic acid	iocetamic acid	iocetamic acid
	primidone	primidone	primidone		primidone	primidone	primidone
	ethotoin	ethotoin	ethotoin		ethotoin	ethotoin	ethotoin
	phenytoin	phenytoin	phenytoin		phenytoin	phenytoin	phenytoin
	mephenytoin	mephenytoin	mephenytoin		mephenytoin	mephenytoin	mephenytoin
	fosphenytoin	fosphenytoin	fosphenytoin		fosphenytoin	fosphenytoin	fosphenytoin
	paramethadione	paramethadione	paramethadione		paramethadione	paramethadione	paramethadione
	trimethadione	trimethadione	trimethadione		trimethadione	trimethadione	trimethadione
	ethosuximide	ethosuximide	ethosuximide		ethosuximide	ethosuximide	ethosuximide
	phensuximide	phensuximide	phensuximide		phensuximide	phensuximide	phensuximide
	carbamazepine	carbamazepine	carbamazepine		carbamazepine	carbamazepine	carbamazepine
	oxcarbazepine	oxcarbazepine	oxcarbazepine		oxcarbazepine	oxcarbazepine	oxcarbazepine
	rufinamide	rufinamide	rufinamide		rufinamide	rufinamide	rufinamide
	valproic acid	valproic acid	valproic acid		valproic acid	valproic acid	valproic acid
	vigabatrin	vigabatrin	vigabatrin		vigabatrin	vigabatrin	vigabatrin
	tiagabine	tiagabine	tiagabine		tiagabine	tiagabine	tiagabine
	phenacemide	phenacemide	phenacemide		phenacemide	phenacemide	phenacemide
	lamotrigine	lamotrigine	lamotrigine		lamotrigine	lamotrigine	lamotrigine
	felbamate	felbamate	felbamate		felbamate	felbamate	felbamate
	topiramate	topiramate	topiramate		topiramate	topiramate	topiramate
	gabapentin	gabapentin	gabapentin		gabapentin	gabapentin	gabapentin
	levetiracetam	levetiracetam	levetiracetam		levetiracetam	levetiracetam	levetiracetam
	zonisamide	zonisamide	zonisamide		zonisamide	zonisamide	zonisamide
	pregabalin	pregabalin	pregabalin		pregabalin	pregabalin	pregabalin
	stiripentol	stiripentol	stiripentol		stiripentol	stiripentol	stiripentol
	lacosamide	lacosamide	lacosamide		lacosamide	lacosamide	lacosamide
	fenfluramine	fenfluramine	fenfluramine		fenfluramine	fenfluramine	fenfluramine
	metharbital	metharbital	metharbital		metharbital	metharbital	metharbital
	clonazepam	clonazepam	clonazepam		clonazepam	clonazepam	clonazepam
	eslicarbazepine	eslicarbazepine	eslicarbazepine		eslicarbazepine	eslicarbazepine	eslicarbazepine
	perampanel	perampanel	perampanel		perampanel	perampanel	perampanel
	brivaracetam	brivaracetam	brivaracetam		brivaracetam	brivaracetam	brivaracetam
	cannabidiol	cannabidiol	cannabidiol		cannabidiol	cannabidiol	cannabidiol
	chlorothiazide	chlorothiazide	chlorothiazide		chlorothiazide	chlorothiazide	chlorothiazide
	hydroflumethiazide	hydroflumethiazide	hydroflumethiazide		hydroflumethiazide	hydroflumethiazide	hydroflumethiazide
	trichlormethiazide	trichlormethiazide	trichlormethiazide		trichlormethiazide	trichlormethiazide	trichlormethiazide
	methyclothiazide	methyclothiazide	methyclothiazide		methyclothiazide	methyclothiazide	methyclothiazide
	polythiazide	polythiazide	polythiazide		polythiazide	polythiazide	polythiazide
	bendroflumethiazide	bendroflumethiazide	bendroflumethiazide		bendroflumethiazide	bendroflumethiazide	bendroflumethiazide
	hydrochlorothiazide	hydrochlorothiazide	hydrochlorothiazide		hydrochlorothiazide	hydrochlorothiazide	hydrochlorothiazide
	cyclothiazide	cyclothiazide	cyclothiazide		cyclothiazide	cyclothiazide	cyclothiazide
	quinethazone	quinethazone	quinethazone		quinethazone	quinethazone	quinethazone
	metolazone	metolazone	metolazone		metolazone	metolazone	metolazone
	indapamide	indapamide	indapamide		indapamide	indapamide	indapamide
	mersalyl	mersalyl	mersalyl		mersalyl	mersalyl	mersalyl
	furosemide	furosemide	furosemide		furosemide	furosemide	furosemide
	bumetanide	bumetanide	bumetanide		bumetanide	bumetanide	bumetanide
	spironolactone	spironolactone	spironolactone		spironolactone	spironolactone	spironolactone
	eplerenone	eplerenone	eplerenone		eplerenone	eplerenone	eplerenone
	amiloride	amiloride	amiloride		amiloride	amiloride	amiloride
	tolvaptan	tolvaptan	tolvaptan		tolvaptan	tolvaptan	tolvaptan
	conivaptan	conivaptan	conivaptan		conivaptan	conivaptan	conivaptan
	halothane	halothane	halothane		halothane	halothane	halothane
	enflurane	enflurane	enflurane		enflurane	enflurane	enflurane
	isoflurane	isoflurane	isoflurane		isoflurane	isoflurane	isoflurane
	desflurane	desflurane	desflurane		desflurane	desflurane	desflurane
	methohexital	methohexital	methohexital		methohexital	methohexital	methohexital
	thiopental	thiopental	thiopental		thiopental	thiopental	thiopental
	fentanyl	fentanyl	fentanyl		fentanyl	fentanyl	fentanyl
	alfentanil	alfentanil	alfentanil		alfentanil	alfentanil	alfentanil
	sufentanil	sufentanil	sufentanil		sufentanil	sufentanil	sufentanil
	anileridine	anileridine	anileridine		anileridine	anileridine	anileridine
	remifentanil	remifentanil	remifentanil		remifentanil	remifentanil	remifentanil
	ketamine	ketamine	ketamine		ketamine	ketamine	ketamine
	etomidate	etomidate	etomidate		etomidate	etomidate	etomidate
	propofol	propofol	propofol		propofol	propofol	propofol
	procaine	procaine	procaine		procaine	procaine	procaine
	tetracaine	tetracaine	tetracaine		tetracaine	tetracaine	tetracaine
	chloroprocaine	chloroprocaine	chloroprocaine		chloroprocaine	chloroprocaine	chloroprocaine
	bupivacaine	bupivacaine	bupivacaine		bupivacaine	bupivacaine	bupivacaine
	lidocaine	lidocaine	lidocaine		lidocaine	lidocaine	lidocaine
	levobupivacaine	levobupivacaine	levobupivacaine		levobupivacaine	levobupivacaine	levobupivacaine
	mepivacaine	mepivacaine	mepivacaine		mepivacaine	mepivacaine	mepivacaine
	prilocaine	prilocaine	prilocaine		prilocaine	prilocaine	prilocaine
	ropivacaine	ropivacaine	ropivacaine		ropivacaine	ropivacaine	ropivacaine
	dyclonine	dyclonine	dyclonine		dyclonine	dyclonine	dyclonine
	capsaicin	capsaicin	capsaicin		capsaicin	capsaicin	capsaicin
	sodium oxybate	sodium oxybate	sodium oxybate		sodium oxybate	sodium oxybate	sodium oxybate
	etidocaine	etidocaine	etidocaine		etidocaine	etidocaine	etidocaine
	cocaine	cocaine	cocaine		cocaine	cocaine	cocaine
	praziquantel	praziquantel	praziquantel		praziquantel	praziquantel	praziquantel
	oxamniquine	oxamniquine	oxamniquine		oxamniquine	oxamniquine	oxamniquine
	triclabendazole	triclabendazole	triclabendazole		triclabendazole	triclabendazole	triclabendazole
	mebendazole	mebendazole	mebendazole		mebendazole	mebendazole	mebendazole
	albendazole	albendazole	albendazole		albendazole	albendazole	albendazole
	levamisole	levamisole	levamisole		levamisole	levamisole	levamisole
	pyrvinium	pyrvinium	pyrvinium		pyrvinium	pyrvinium	pyrvinium
	niclosamide	niclosamide	niclosamide		niclosamide	niclosamide	niclosamide
	piperazine	piperazine	piperazine		piperazine	piperazine	piperazine
	diethylcarbamazine	diethylcarbamazine	diethylcarbamazine		diethylcarbamazine	diethylcarbamazine	diethylcarbamazine
	reserpine	reserpine	reserpine		reserpine	reserpine	reserpine
	guanfacine	guanfacine	guanfacine		guanfacine	guanfacine	guanfacine
	clonidine	clonidine	clonidine		clonidine	clonidine	clonidine
	mecamylamine	mecamylamine	mecamylamine		mecamylamine	mecamylamine	mecamylamine
	prazosin	prazosin	prazosin		prazosin	prazosin	prazosin
	doxazosin	doxazosin	doxazosin		doxazosin	doxazosin	doxazosin
	guanethidine	guanethidine	guanethidine		guanethidine	guanethidine	guanethidine
	hydralazine	hydralazine	hydralazine		hydralazine	hydralazine	hydralazine
	pinacidil	pinacidil	pinacidil		pinacidil	pinacidil	pinacidil
	pargyline	pargyline	pargyline		pargyline	pargyline	pargyline
	bosentan	bosentan	bosentan		bosentan	bosentan	bosentan
	ambrisentan	ambrisentan	ambrisentan		ambrisentan	ambrisentan	ambrisentan
	rescinnamine	rescinnamine	rescinnamine		rescinnamine	rescinnamine	rescinnamine
	deserpidine	deserpidine	deserpidine		deserpidine	deserpidine	deserpidine
	minoxidil	minoxidil	minoxidil		minoxidil	minoxidil	minoxidil
	macitentan	macitentan	macitentan		macitentan	macitentan	macitentan
	riociguat	riociguat	riociguat		riociguat	riociguat	riociguat
	levonorgestrel	levonorgestrel	levonorgestrel		levonorgestrel	levonorgestrel	levonorgestrel
	megestrol	megestrol	megestrol		megestrol	megestrol	megestrol
	medroxyprogesterone	medroxyprogesterone	medroxyprogesterone		medroxyprogesterone	medroxyprogesterone	medroxyprogesterone
	etonogestrel	etonogestrel	etonogestrel		etonogestrel	etonogestrel	etonogestrel
	desogestrel	desogestrel	desogestrel		desogestrel	desogestrel	desogestrel
	ulipristal	ulipristal	ulipristal		ulipristal	ulipristal	ulipristal
	fluoxymesterone	fluoxymesterone	fluoxymesterone		fluoxymesterone	fluoxymesterone	fluoxymesterone
	methyltestosterone	methyltestosterone	methyltestosterone		methyltestosterone	methyltestosterone	methyltestosterone
	testosterone	testosterone	testosterone		testosterone	testosterone	testosterone
	estradiol	estradiol	estradiol		estradiol	estradiol	estradiol
	chlorotrianisene	chlorotrianisene	chlorotrianisene		chlorotrianisene	chlorotrianisene	chlorotrianisene
	estrone	estrone	estrone		estrone	estrone	estrone
	dienestrol	dienestrol	dienestrol		dienestrol	dienestrol	dienestrol
	diethylstilbestrol	diethylstilbestrol	diethylstilbestrol		diethylstilbestrol	diethylstilbestrol	diethylstilbestrol
	progesterone	progesterone	progesterone		progesterone	progesterone	progesterone
	dydrogesterone	dydrogesterone	dydrogesterone		dydrogesterone	dydrogesterone	dydrogesterone
	dienogest	dienogest	dienogest		dienogest	dienogest	dienogest
	danazol	danazol	danazol		danazol	danazol	danazol
	mifepristone	mifepristone	mifepristone		mifepristone	mifepristone	mifepristone
	bazedoxifene	bazedoxifene	bazedoxifene		bazedoxifene	bazedoxifene	bazedoxifene
	ospemifene	ospemifene	ospemifene		ospemifene	ospemifene	ospemifene
	urofollitropin	urofollitropin	urofollitropin		urofollitropin	urofollitropin	urofollitropin
	magnesium carbonate	magnesium carbonate	magnesium carbonate		magnesium carbonate	magnesium carbonate	magnesium carbonate
	magnesium hydroxide	magnesium hydroxide	magnesium hydroxide		magnesium hydroxide	magnesium hydroxide	magnesium hydroxide
	cimetidine	cimetidine	cimetidine		cimetidine	cimetidine	cimetidine
	ranitidine	ranitidine	ranitidine		ranitidine	ranitidine	ranitidine
	famotidine	famotidine	famotidine		famotidine	famotidine	famotidine
	nizatidine	nizatidine	nizatidine		nizatidine	nizatidine	nizatidine
	misoprostol	misoprostol	misoprostol		misoprostol	misoprostol	misoprostol
	omeprazole	omeprazole	omeprazole		omeprazole	omeprazole	omeprazole
	pantoprazole	pantoprazole	pantoprazole		pantoprazole	pantoprazole	pantoprazole
	lansoprazole	lansoprazole	lansoprazole		lansoprazole	lansoprazole	lansoprazole
	rabeprazole	rabeprazole	rabeprazole		rabeprazole	rabeprazole	rabeprazole
	esomeprazole	esomeprazole	esomeprazole		esomeprazole	esomeprazole	esomeprazole
	dexlansoprazole	dexlansoprazole	dexlansoprazole		dexlansoprazole	dexlansoprazole	dexlansoprazole
	sucralfate	sucralfate	sucralfate		sucralfate	sucralfate	sucralfate
	magnesium oxide	magnesium oxide	magnesium oxide		magnesium oxide	magnesium oxide	magnesium oxide
	calcium carbonate	calcium carbonate	calcium carbonate		calcium carbonate	calcium carbonate	calcium carbonate
	nifedipine	nifedipine	nifedipine		nifedipine	nifedipine	nifedipine
	nimodipine	nimodipine	nimodipine		nimodipine	nimodipine	nimodipine
	nicardipine	nicardipine	nicardipine		nicardipine	nicardipine	nicardipine
	isradipine	isradipine	isradipine		isradipine	isradipine	isradipine
	amlodipine	amlodipine	amlodipine		amlodipine	amlodipine	amlodipine
	felodipine	felodipine	felodipine		felodipine	felodipine	felodipine
	clevidipine	clevidipine	clevidipine		clevidipine	clevidipine	clevidipine
	nisoldipine	nisoldipine	nisoldipine		nisoldipine	nisoldipine	nisoldipine
	verapamil	verapamil	verapamil		verapamil	verapamil	verapamil
	diltiazem	diltiazem	diltiazem		diltiazem	diltiazem	diltiazem
	bepridil	bepridil	bepridil		bepridil	bepridil	bepridil
	levamlodipine	levamlodipine	levamlodipine		levamlodipine	levamlodipine	levamlodipine
	moexipril	moexipril	moexipril		moexipril	moexipril	moexipril
	spirapril	spirapril	spirapril		spirapril	spirapril	spirapril
	perindopril	perindopril	perindopril		perindopril	perindopril	perindopril
	benazepril	benazepril	benazepril		benazepril	benazepril	benazepril
	ramipril	ramipril	ramipril		ramipril	ramipril	ramipril
	enalapril	enalapril	enalapril		enalapril	enalapril	enalapril
	trandolapril	trandolapril	trandolapril		trandolapril	trandolapril	trandolapril
	captopril	captopril	captopril		captopril	captopril	captopril
	fosinopril	fosinopril	fosinopril		fosinopril	fosinopril	fosinopril
	lisinopril	lisinopril	lisinopril		lisinopril	lisinopril	lisinopril
	quinapril	quinapril	quinapril		quinapril	quinapril	quinapril
	losartan	losartan	losartan		losartan	losartan	losartan
	valsartan	valsartan	valsartan		valsartan	valsartan	valsartan
	telmisartan	telmisartan	telmisartan		telmisartan	telmisartan	telmisartan
	candesartan	candesartan	candesartan		candesartan	candesartan	candesartan
	irbesartan	irbesartan	irbesartan		irbesartan	irbesartan	irbesartan
	eprosartan	eprosartan	eprosartan		eprosartan	eprosartan	eprosartan
	aliskiren	aliskiren	aliskiren		aliskiren	aliskiren	aliskiren
	169	150	152		191	163	168
	152
	151	134	134		179

## Sheet: Hclust Experiment 2 Results
Drugs	Cluster Number					Cluster Number	Number of Drugs in the cluster
chloroquine	1					1	14
amodiaquine	1					2	37
quinine	1					3	69
primaquine	1					4	34
proguanil	1					5	384
pyrimethamine	1					6	79
sulfadoxine	1					7	80
mefloquine	1					8	46
artesunate	1					9	40
halofantrine	1					10	14
artemether	1					11	28
atovaquone	1					12	31
tafenoquine	1					13	22
lumefantrine	1					14	32
morphine	2					15	28
procaine	2					16	15
lidocaine	2					17	67
methadone	2					18	24
naloxone	2					19	42
tetracaine	2					20	70
meperidine	2					21	29
levorphanol	2					22	15
codeine	2					23	22
pentazocine	2					24	40
bupivacaine	2					25	30
dibucaine	2					26	20
etidocaine	2					27	36
naltrexone	2					28	36
mepivacaine	2					29	32
oxymorphone	2					30	15
oxycodone	2					31	14
hydrocodone	2					32	16
levallorphan	2					33	25
buprenorphine	2					34	13
butorphanol	2					35	24
dihydrocodeine	2					36	27
hydromorphone	2					37	10
nalbuphine	2					38	24
prilocaine	2					39	31
propoxycaine	2					40	28
dezocine	2					41	12
tramadol	2					42	6
ziconotide	2					43	8
ropivacaine	2
ketorolac	2
chloroprocaine	2
gabapentin	2
benoxinate	2
pregabalin	2
levobupivacaine	2
tapentadol	2
metaraminol	3
epinephrine	3
digitoxin	3
propranolol	3
isoproterenol	3
phenoxybenzamine	3
dihydroergotamine	3
norepinephrine	3
reserpine	3
phentolamine	3
minoxidil	3
phenylephrine	3
methyldopa	3
adenosine	3
clonidine	3
oxymetazoline	3
naphazoline	3
guanethidine	3
oxprenolol	3
acebutolol	3
pindolol	3
verapamil	3
bethanidine	3
hydralazine	3
atenolol	3
ergotamine	3
trimethaphan	3
dipyridamole	3
nitroglycerin	3
nifedipine	3
digoxin	3
mephentermine	3
antazoline	3
deslanoside	3
labetalol	3
ergoloid mesylates	3
methoxamine	3
guanabenz	3
pentolinium tartrate	3
tolazoline	3
metoprolol	3
dobutamine	3
prazosin	3
diltiazem	3
penbutolol	3
nadolol	3
guanfacine	3
nicardipine	3
nimodipine	3
esmolol	3
milrinone	3
isradipine	3
nisoldipine	3
bisoprolol	3
felodipine	3
moexipril	3
spirapril	3
eprosartan	3
bretylium	3
carvedilol	3
sumatriptan	3
nebivolol	3
tetrahydrozoline	3
guanadrel	3
arbutamine	3
ivabradine	3
clevidipine	3
regadenoson	3
azilsartan	3
isocarboxazid	4
dopamine	4
amphetamine	4
apomorphine	4
dextroamphetamine	4
cocaine	4
methysergide	4
cyproheptadine	4
mazindol	4
levodopa	4
haloperidol	4
pargyline	4
pimozide	4
amantadine	4
methamphetamine	4
carbidopa	4
tranylcypromine	4
phenelzine	4
fenfluramine	4
tetrabenazine	4
bromocriptine	4
selegiline	4
pergolide	4
cabergoline	4
entacapone	4
rotigotine	4
pramipexole	4
tolcapone	4
ropinirole	4
rasagiline	4
safinamide	4
istradefylline	4
pimavanserin	4
opicapone	4
glutathione	5
malathion	5
pentagastrin	5
methylene blue	5
nitrofurazone	5
oxytocin	5
acetazolamide	5
magnesium sulfate	5
diphenoxylate	5
secretin	5
propantheline	5
droxidopa	5
methimazole	5
penicillamine	5
sulfasalazine	5
metoclopramide	5
sulfapyridine	5
nitrofurantoin	5
iodine	5
indomethacin	5
mafenide	5
barium sulfate	5
cysteamine	5
sulfacetamide	5
oxyphenonium	5
paromomycin	5
ritodrine	5
probenecid	5
thyrotropin	5
lactulose	5
lypressin	5
piperazine	5
chlorhexidine	5
clioquinol	5
ceruletide	5
allopurinol	5
methenamine	5
sulfamerazine	5
levamisole	5
paramethasone	5
sulfinpyrazone	5
propylthiouracil	5
deferoxamine	5
thiabendazole	5
candicidin	5
tinidazole	5
pentamidine	5
diethylcarbamazine	5
hexachlorophene	5
gentian violet	5
tiopronin	5
ethoxzolamide	5
acetylcysteine	5
piperonyl butoxide	5
loperamide	5
dimercaprol	5
propiolactone	5
pyrethrins	5
bacitracin	5
betazole	5
methylergonovine	5
chlormerodrin	5
sulfisoxazole	5
silver sulfadiazine	5
methazolamide	5
oxamniquine	5
iopanoic acid	5
evans blue	5
niclosamide	5
flavoxate	5
mebendazole	5
povidone-iodine	5
pentoxifylline	5
simethicone	5
sulfamethizole	5
epoprostenol	5
sodium nitrite	5
potassium iodide	5
praziquantel	5
permethrin	5
dinoprostone	5
alprostadil	5
plicamycin	5
flumethasone	5
midodrine	5
selenomethionine	5
furazolidone	5
ipodate	5
isosorbide	5
menthol	5
nifurtimox	5
hydroxocobalamin	5
dichlorphenamide	5
succimer	5
propyliodone	5
pyrithione	5
manganese chloride	5
dinoprost	5
bisacodyl	5
trientine	5
sodium tetradecyl sulfate	5
triclosan	5
carboprost	5
estetrol	5
sulfameter	5
tyropanoate	5
haloprogin	5
benzyl alcohol	5
selenious acid	5
sincalide	5
lutetium	5
bentiromide	5
zinc chloride	5
phenazopyridine	5
oxyphencyclimine	5
bismuth subsalicylate	5
medrysone	5
zinc sulfate	5
dyphylline	5
ferrous sulfate	5
albendazole	5
ivermectin	5
clidinium	5
sodium phosphate	5
polidocanol	5
hydroxystilbamidine	5
pipobroman	5
iloprost	5
sapropterin	5
masoprocol	5
mifepristone	5
miltefosine	5
octreotide	5
cisapride	5
cilostazol	5
misoprostol	5
dyclonine	5
perflubron	5
iofetamine	5
auranofin	5
mesalamine	5
diphemanil methylsulfate	5
ferric ammonium citrate	5
deflazacort	5
sodium thiosulfate	5
chromic chloride	5
fluocinolone	5
poractant alfa	5
sargramostim	5
triclofos	5
olsalazine	5
ferric citrate	5
sermorelin	5
methylnaltrexone	5
gallium nitrate	5
cupric chloride	5
rifaximin	5
potassium perchlorate	5
defibrotide	5
triclabendazole	5
deferiprone	5
trimetrexate	5
lanreotide	5
imciromab pentetate	5
colfosceril palmitate	5
beractant	5
ferrous fumarate	5
fenoldopam	5
bethanechol	5
lactitol	5
balsalazide	5
pramoxine	5
nitisinone	5
benzquinamide	5
ferric maltol	5
secnidazole	5
amlexanox	5
crotamiton	5
cevimeline	5
cetyl alcohol	5
miglustat	5
dexpanthenol	5
decamethonium	5
anagrelide	5
ingenol	5
methyl salicylate	5
pancrelipase	5
cyclobenzaprine	5
manganese sulfate	5
edaravone	5
benzyl benzoate	5
acetohydroxamic acid	5
oxybenzone	5
perflexane	5
histrelin	5
invert sugar	5
difenoxin	5
avobenzone	5
lithium citrate	5
docosanol	5
pegaspargase	5
valrubicin	5
benzonatate	5
dromostanolone	5
menadiol	5
diphenidol	5
meclocycline	5
pyrvinium	5
zinc acetate	5
pegademase bovine	5
anileridine	5
butalbital	5
chloroxine	5
meprednisone	5
phendimetrazine	5
lodoxamide tromethamine	5
tridihexethyl	5
polyestradiol	5
ethynodiol	5
indecainide	5
levoleucovorin	5
hexocyclium	5
sulfoxone	5
cycrimine	5
hexafluorenium	5
methixene	5
pegloticase	5
ethinamate	5
quinethazone	5
nitazoxanide	5
anisindione	5
clocortolone pivalate	5
lapyrium	5
hexylcaine	5
acetophenazine	5
bosentan	5
migalastat	5
pirfenidone	5
ulipristal	5
aldesleukin	5
imiglucerase	5
febuxostat	5
ardeparin	5
alosetron	5
metharbital	5
zaleplon	5
octocrylene	5
metaxalone	5
flibanserin	5
epoetin alfa	5
methantheline	5
rescinnamine	5
capromab pendetide	5
sildenafil citrate	5
bentoquatam	5
potassium acetate	5
isopropamide iodide	5
conivaptan	5
tegaserod	5
icodextrin	5
vilazodone hydrochloride	5
propiomazine	5
palivizumab	5
sodium benzoate	5
tolvaptan	5
calfactant	5
fluciclovine f-18	5
prucalopride	5
pegvisomant	5
spinosad	5
methyprylon	5
deferasirox	5
alvimopan	5
metreleptin	5
darbepoetin alfa	5
treprostinil	5
abarelix	5
tadalafil	5
mepolizumab	5
rasburicase	5
pasireotide	5
agalsidase beta	5
dexlansoprazole	5
obeticholic acid	5
ambrisentan	5
macimorelin	5
fospropofol	5
tasimelteon	5
bremelanotide	5
deserpidine	5
protokylol	5
piperacetazine	5
levopropoxyphene	5
tofacitinib	5
tesamorelin	5
voclosporin	5
romiplostim	5
eculizumab	5
ramelteon	5
teduglutide	5
obiltoxaximab	5
lucinactant	5
lubiprostone	5
siltuximab	5
galsulfase	5
ecallantide	5
reslizumab	5
ioflupane	5
eltrombopag	5
idursulfase	5
eliglustat	5
selexipag	5
remimazolam	5
ferric carboxymaltose	5
linaclotide	5
eszopiclone	5
carglumic acid	5
cariprazine	5
necitumumab	5
rucaparib	5
rilonacept	5
triheptanoin	5
macitentan	5
elagolix	5
crofelemer	5
riociguat	5
levamlodipine	5
canakinumab	5
raxibacumab	5
flutemetamol	5
eteplirsen	5
tafamidis	5
florbetapir	5
niraparib	5
lifitegrast	5
ponesimod	5
suvorexant	5
avanafil	5
vortioxetine	5
patiromer	5
taliglucerase alfa	5
peginesatide	5
relugolix	5
levomefolate calcium	5
dornase alfa	5
benralizumab	5
asfotase alfa	5
interferon gamma-1b	5
eluxadoline	5
plecanatide	5
dexrazoxane	5
telotristat	5
talazoparib	5
vericiguat	5
naloxegol	5
sarilumab	5
levalbuterol	5
doravirine	5
olaratumab	5
lesinurad	5
tipiracil	5
tenapanor	5
sucroferric oxyhydroxide	5
nusinersen	5
brexpiprazole	5
baricitinib	5
encorafenib	5
abaloparatide	5
valbenazine	5
sebelipase alfa	5
gilteritinib	5
patisiran	5
capmatinib	5
ozanimod	5
emicizumab	5
lusutrombopag	5
mecasermin	5
deutetrabenazine	5
bictegravir	5
brexanolone	5
naldemedine	5
cerliponase alfa	5
voxelotor	5
baloxavir	5
glutethimide	6
chlordiazepoxide	6
chlorpromazine	6
calcium	6
nicotine	6
caffeine	6
histamine	6
acetylcholine	6
atropine	6
gallamine triethiodide	6
scopolamine	6
diazepam	6
mephenytoin	6
isoflurophate	6
cannabidiol	6
dronabinol	6
pentobarbital	6
disulfiram	6
meprobamate	6
carbachol	6
pilocarpine	6
tubocurarine	6
neostigmine	6
mecamylamine	6
acetaminophen	6
ephedrine	6
benzphetamine	6
chlorphentermine	6
phentermine	6
baclofen	6
ethchlorvynol	6
phenmetrazine	6
guaifenesin	6
methylphenidate	6
secobarbital	6
edrophonium	6
diethylpropion	6
sodium oxybate	6
dextromethorphan	6
echothiophate iodide	6
pemoline	6
pyridostigmine bromide	6
sulfaphenazole	6
dantrolene	6
galantamine	6
troleandomycin	6
capsaicin	6
chlormezanone	6
chlorphenesin	6
tacrine	6
carisoprodol	6
memantine	6
chlorzoxazone	6
ambenonium chloride	6
methocarbamol	6
tizanidine	6
cyclothiazide	6
pralidoxime	6
amifampridine	6
orlistat	6
bupropion	6
fomepizole	6
nalmefene	6
nabilone	6
modafinil	6
acamprosate	6
riluzole	6
sibutramine	6
lofexidine	6
donepezil	6
atomoxetine hydrochloride	6
rivastigmine	6
demecarium	6
dexmethylphenidate hydrochloride	6
varenicline	6
incobotulinumtoxina	6
lorcaserin	6
lisdexamfetamine dimesylate	6
abobotulinumtoxina	6
tyrosine	7
urea	7
arginine	7
sodium chloride	7
potassium chloride	7
deoxycholic acid	7
cellulose	7
glycine	7
dactinomycin	7
cysteine	7
glycerol	7
ascorbic acid	7
folic acid	7
uridine	7
xylose	7
calcium carbonate	7
pyridoxine	7
dimethyl sulfoxide	7
mannitol	7
lipase	7
ammonium chloride	7
choline	7
calcium chloride	7
tromethamine	7
riboflavin	7
vitamin a	7
colchicine	7
biotin	7
sorbitol	7
hydroxyurea	7
lanthanum	7
thiamine	7
aluminum	7
silver	7
idoxuridine	7
magnesium oxide	7
mersalyl	7
uracil	7
amiloride	7
inulin	7
polytetrafluoroethylene	7
bumetanide	7
betaine	7
pantothenic acid	7
vitamin e	7
sodium fluoride	7
floxuridine	7
magnesium hydroxide	7
trypan blue	7
zinc oxide	7
calcium gluconate	7
methoxsalen	7
beta carotene	7
sodium bicarbonate	7
gramicidin	7
trioxsalen	7
safflower oil	7
magnesium chloride	7
citric acid	7
lactic acid	7
guanidine	7
sodium acetate	7
cholic acid	7
fluorescein	7
soybean oil	7
olive oil	7
sodium carbonate	7
tartaric acid	7
phosphoric acid	7
magnesium carbonate	7
ethanolamine	7
sodium sulfate	7
titanium dioxide	7
potassium sulfate	7
alpha-tocopherol	7
magnesium trisilicate	7
sodium lactate	7
potassium citrate	7
sodium citrate	7
polyethylene	7
cyclophosphamide	8
ifosfamide	8
methotrexate	8
asparaginase	8
altretamine	8
lomustine	8
mercaptopurine	8
vinblastine	8
doxorubicin	8
fluorouracil	8
chlorambucil	8
mechlorethamine	8
thiotepa	8
daunorubicin	8
cytarabine	8
procarbazine	8
melphalan	8
busulfan	8
thioguanine	8
vincristine	8
leucovorin	8
carmustine	8
dacarbazine	8
mesna	8
cisplatin	8
bleomycin	8
etoposide	8
teniposide	8
amifostine	8
mitomycin	8
idarubicin	8
paclitaxel	8
epirubicin	8
carboplatin	8
mitoxantrone	8
vinorelbine	8
irinotecan	8
gemcitabine	8
topotecan	8
docetaxel	8
temozolomide	8
pemetrexed	8
oxaliplatin	8
trabectedin	8
capecitabine	8
olaparib	8
cortisone	9
hydrocortisone	9
betamethasone	9
azathioprine	9
prednisone	9
prednisolone	9
methylprednisolone	9
triamcinolone	9
mycophenolic acid	9
hydroxychloroquine	9
cyclosporine	9
tacrolimus	9
abatacept	9
interferon beta-1b	9
interferon beta-1a	9
dimethyl fumarate	9
leflunomide	9
glatiramer acetate	9
infliximab	9
daclizumab	9
etanercept	9
rituximab	9
fingolimod hydrochloride	9
basiliximab	9
peginterferon beta-1a	9
adalimumab	9
natalizumab	9
certolizumab pegol	9
tocilizumab	9
ustekinumab	9
apremilast	9
belimumab	9
teriflunomide	9
golimumab	9
ocrelizumab	9
vedolizumab	9
ixekizumab	9
secukinumab	9
brodalumab	9
guselkumab	9
oxazepam	10
lorazepam	10
flurazepam	10
clonazepam	10
clorazepate dipotassium	10
temazepam	10
estazolam	10
triazolam	10
prazepam	10
flumazenil	10
alprazolam	10
zolpidem	10
quazepam	10
halazepam	10
ipratropium	11
theophylline	11
aminophylline	11
metaproterenol	11
albuterol	11
glycopyrrolate	11
doxapram	11
beclomethasone	11
terbutaline	11
isoetharine	11
methacholine chloride	11
budesonide	11
pirbuterol	11
flunisolide	11
salmeterol xinafoate	11
formoterol fumarate	11
fluticasone	11
bitolterol	11
mometasone furoate	11
tiotropium bromide	11
ciclesonide	11
roflumilast	11
indacaterol	11
aclidinium bromide	11
ivacaftor	11
lumacaftor	11
olodaterol	11
vilanterol	11
methoxyflurane	12
enflurane	12
isoflurane	12
halothane	12
ketamine	12
droperidol	12
pancuronium	12
thiopental	12
succinylcholine	12
fentanyl	12
methohexital	12
etomidate	12
thiamylal	12
sufentanil	12
midazolam	12
propofol	12
metocurine	12
atracurium	12
sevoflurane	12
alfentanil	12
desflurane	12
mivacurium	12
pipecuronium	12
rocuronium	12
vecuronium bromide	12
doxacurium	12
remifentanil	12
rapacuronium	12
cisatracurium	12
dexmedetomidine	12
sugammadex	12
spironolactone	13
saralasin	13
captopril	13
benazepril	13
amlodipine	13
lisinopril	13
perindopril	13
enalapril	13
losartan	13
icatibant	13
enalaprilat	13
ramipril	13
fosinopril	13
quinapril	13
trandolapril	13
candesartan	13
valsartan	13
irbesartan	13
telmisartan	13
eplerenone	13
olmesartan	13
aliskiren	13
glucagon	14
insulin	14
diazoxide	14
chlorpropamide	14
tolbutamide	14
streptozocin	14
glyburide	14
acetohexamide	14
glipizide	14
metformin	14
tolazamide	14
exenatide	14
acarbose	14
pioglitazone	14
pinacidil	14
miglitol	14
glimepiride	14
troglitazone	14
repaglinide	14
nateglinide	14
rosiglitazone	14
pramlintide	14
liraglutide	14
lixisenatide	14
sitagliptin phosphate	14
saxagliptin	14
alogliptin	14
linagliptin	14
dulaglutide	14
canagliflozin	14
empagliflozin	14
semaglutide	14
phenytoin	15
primidone	15
carbamazepine	15
ethosuximide	15
valproic acid	15
trimethadione	15
phensuximide	15
vigabatrin	15
clobazam	15
stiripentol	15
methsuximide	15
rufinamide	15
zonisamide	15
tiagabine	15
lamotrigine	15
felbamate	15
oxcarbazepine	15
levetiracetam	15
fosphenytoin	15
topiramate	15
phenacemide	15
paramethadione	15
ezogabine	15
lacosamide	15
ethotoin	15
brivaracetam	15
perampanel	15
eslicarbazepine	15
quinidine	16
procainamide	16
sotalol	16
amiodarone	16
disopyramide	16
mexiletine	16
tocainide	16
propafenone	16
flecainide	16
bepridil	16
dofetilide	16
moricizine	16
ibutilide	16
ranolazine	16
dronedarone	16
testosterone	17
estradiol	17
menotropins	17
metyrapone	17
mestranol	17
megestrol	17
progesterone	17
methyltestosterone	17
diethylstilbestrol	17
mitotane	17
clomiphene	17
estrone	17
ethinyl estradiol	17
norgestrel	17
norethindrone	17
desoxycorticosterone	17
aminoglutethimide	17
nandrolone	17
quinestrol	17
dienestrol	17
cosyntropin	17
oxymetholone	17
fludrocortisone	17
dydrogesterone	17
danazol	17
medroxyprogesterone	17
oxandrolone	17
ethylestrenol	17
chlorotrianisene	17
norethynodrel	17
estramustine	17
fluoxymesterone	17
stanozolol	17
flutamide	17
testolactone	17
levonorgestrel	17
desogestrel	17
estropipate	17
trilostane	17
goserelin	17
finasteride	17
triptorelin pamoate	17
leuprolide	17
nilutamide	17
nafarelin	17
dienogest	17
etonogestrel	17
cetrorelix	17
norgestimate	17
raloxifene hydrochloride	17
toremifene	17
bicalutamide	17
ganirelix	17
letrozole	17
exemestane	17
drospirenone	17
norelgestromin	17
anastrozole	17
abiraterone	17
dutasteride	17
ospemifene	17
bazedoxifene	17
estrogens, conjugated synthetic a	17
urofollitropin	17
cabazitaxel	17
apalutamide	17
darolutamide	17
imipramine	18
desipramine	18
amitriptyline	18
doxepin	18
nortriptyline	18
maprotiline	18
clomipramine	18
protriptyline	18
trazodone	18
trimipramine	18
amoxapine	18
viloxazine	18
fluoxetine	18
citalopram	18
sertraline	18
fluvoxamine	18
paroxetine	18
buspirone	18
nefazodone	18
milnacipran	18
venlafaxine hydrochloride	18
mirtazapine	18
duloxetine hydrochloride	18
desvenlafaxine succinate	18
penicillin v	19
penicillin g benzathine	19
carbenicillin	19
ticarcillin	19
cloxacillin	19
cephradine	19
cephalexin	19
cephalothin	19
cephapirin	19
nafcillin	19
dicloxacillin	19
penicillin g procaine	19
cephaloglycin	19
methacycline	19
cyclacillin	19
demeclocycline	19
amdinocillin	19
cefoxitin	19
cefamandole	19
cefaclor	19
netilmicin	19
azlocillin	19
mezlocillin	19
bacampicillin	19
hetacillin	19
cefotiam	19
ceforanide	19
cefoperazone	19
ceftizoxime	19
aztreonam	19
cefpodoxime	19
ceftibuten	19
cefprozil	19
cefdinir	19
cefixime	19
cefotetan	19
cefmetazole	19
cefmenoxime	19
loracarbef	19
moxalactam	19
cefonicid	19
cefditoren	19
dexamethasone	20
niacinamide	20
tretinoin	20
tamoxifen	20
sulindac	20
azacitidine	20
decitabine	20
eflornithine	20
midostaurin	20
rifabutin	20
sirolimus	20
becaplermin	20
arsenic trioxide	20
denileukin diftitox	20
fulvestrant	20
romidepsin	20
bexarotene	20
vorinostat	20
imatinib mesylate	20
cetuximab	20
alitretinoin	20
celecoxib	20
everolimus	20
trastuzumab	20
lonafarnib	20
bortezomib	20
erlotinib hydrochloride	20
temsirolimus	20
gefitinib	20
eribulin	20
panitumumab	20
ixabepilone	20
lapatinib	20
sorafenib	20
sunitinib	20
bosutinib	20
belinostat	20
pertuzumab	20
dasatinib	20
panobinostat	20
palbociclib	20
axitinib	20
ado-trastuzumab emtansine	20
ipilimumab	20
pazopanib	20
crizotinib	20
afatinib	20
fostamatinib	20
lenvatinib	20
nintedanib	20
ramucirumab	20
cabozantinib	20
ponatinib	20
vemurafenib	20
idelalisib	20
nivolumab	20
tivozanib	20
regorafenib	20
trametinib	20
dabrafenib	20
venetoclax	20
pembrolizumab	20
ceritinib	20
ribociclib	20
atezolizumab	20
durvalumab	20
avelumab	20
entrectinib	20
acalabrutinib	20
osimertinib	20
trifluoperazine	21
thiothixene	21
thioridazine	21
fluphenazine	21
perphenazine	21
clozapine	21
mesoridazine	21
promazine	21
chlorprothixene	21
procyclidine	21
triflupromazine	21
orphenadrine	21
trihexyphenidyl	21
benztropine	21
loxapine	21
molindone	21
biperiden	21
trimeprazine	21
amisulpride	21
lithium carbonate	21
risperidone	21
paliperidone palmitate	21
quetiapine fumarate	21
olanzapine	21
asenapine	21
ziprasidone	21
iloperidone	21
aripiprazole	21
lurasidone hydrochloride	21
prochlorperazine	22
meclizine	22
cyclizine	22
dimenhydrinate	22
thiethylperazine	22
dicyclomine	22
doxylamine	22
ondansetron	22
granisetron	22
dolasetron	22
trimethobenzamide	22
palonosetron	22
aprepitant	22
netupitant	22
fosaprepitant	22
clofibrate	23
colestipol	23
dextrothyroxine	23
probucol	23
fenofibrate	23
niacin	23
gemfibrozil	23
tyloxapol	23
lovastatin	23
simvastatin	23
pravastatin	23
fluvastatin	23
fenofibric acid	23
atorvastatin	23
cerivastatin	23
colesevelam hydrochloride	23
pitavastatin	23
ezetimibe	23
rosuvastatin calcium	23
mipomersen	23
alirocumab	23
evolocumab	23
diphenhydramine	24
promethazine	24
pyrilamine	24
chlorpheniramine	24
cromolyn sodium	24
tripelennamine	24
clemastine	24
triprolidine	24
hydroxyzine	24
brompheniramine	24
pheniramine	24
ketotifen	24
nedocromil	24
cetirizine	24
loratadine	24
azelastine	24
zileuton	24
zafirlukast	24
levocabastine	24
pemirolast	24
epinastine	24
olopatadine hydrochloride	24
acrivastine	24
dexchlorpheniramine	24
carbinoxamine	24
pseudoephedrine	24
azatadine	24
emedastine	24
bromodiphenhydramine	24
desloratadine	24
diphenylpyraline	24
dexbrompheniramine	24
methdilazine	24
buclizine	24
montelukast	24
fexofenadine	24
bepotastine	24
omalizumab	24
levocetirizine	24
alcaftadine	24
trimethoprim	25
chloramphenicol	25
rifampin	25
streptomycin	25
nalidixic acid	25
cycloserine	25
tetracycline	25
spectinomycin	25
kanamycin	25
isoniazid	25
oxytetracycline	25
chlortetracycline	25
novobiocin	25
lincomycin	25
dapsone	25
sulfadiazine	25
erythromycin	25
neomycin	25
sulfamethoxazole	25
pyrazinamide	25
aminosalicylic acid	25
ethambutol	25
ethionamide	25
capreomycin	25
viomycin	25
clofazimine	25
norfloxacin	25
rifapentine	25
sulfanilamide	25
bedaquiline	25
ibuprofen	26
phenylbutazone	26
flurbiprofen	26
tolmetin	26
oxyphenbutazone	26
mefenamic acid	26
ketoprofen	26
naproxen	26
diclofenac	26
fenoprofen	26
diflunisal	26
suprofen	26
piroxicam	26
etodolac	26
nabumetone	26
carprofen	26
oxaprozin	26
meloxicam	26
rofecoxib	26
valdecoxib	26
heparin	27
tranexamic acid	27
fibrinolysin	27
warfarin	27
aspirin	27
aprotinin	27
vitamin k	27
phenprocoumon	27
aminocaproic acid	27
phenindione	27
dicumarol	27
ticlopidine	27
danaparoid	27
bivalirudin	27
reteplase	27
desirudin	27
clopidogrel	27
argatroban	27
tirofiban	27
enoxaparin	27
dalteparin	27
eptifibatide	27
abciximab	27
tinzaparin	27
cangrelor	27
tenecteplase	27
prasugrel hydrochloride	27
fondaparinux	27
dabigatran	27
rivaroxaban	27
ticagrelor	27
apixaban	27
vorapaxar	27
edoxaban	27
betrixaban	27
idarucizumab	27
ampicillin	28
amoxicillin	28
doxycycline	28
methicillin	28
tobramycin	28
oxacillin	28
cefazolin	28
vancomycin	28
metronidazole	28
clindamycin	28
amikacin	28
fosfomycin	28
minocycline	28
cefuroxime	28
colistin	28
piperacillin	28
cefotaxime	28
ceftazidime	28
ciprofloxacin	28
azithromycin	28
imipenem	28
cilastatin	28
meropenem	28
ofloxacin	28
sulbactam	28
ceftriaxone	28
clarithromycin	28
mupirocin	28
tazobactam	28
daptomycin	28
cefepime	28
levofloxacin	28
linezolid	28
doripenem	28
tigecycline	28
ertapenem	28
levobunolol	29
indocyanine green	29
cyclopentolate	29
timolol	29
metipranolol	29
betaxolol	29
fluprednisolone	29
carteolol	29
tropicamide	29
fluorometholone	29
brimonidine tartrate	29
dipivefrin	29
apraclonidine	29
dapiprazole	29
perflutren	29
latanoprost	29
loteprednol etabonate	29
homatropine	29
dorzolamide	29
bromfenac	29
rimexolone	29
difluprednate	29
verteporfin	29
brinzolamide	29
nepafenac	29
bimatoprost	29
travoprost	29
bevacizumab	29
tafluprost	29
pegaptanib	29
ranibizumab	29
aflibercept	29
parathyroid hormone	30
calcitonin	30
cholecalciferol	30
calcitriol	30
teriparatide	30
calcifediol	30
pamidronate	30
alendronate	30
zoledronic acid	30
paricalcitol	30
sevelamer	30
lanthanum carbonate	30
calcium acetate	30
cinacalcet	30
denosumab	30
hydrochlorothiazide	31
methyclothiazide	31
chlorothiazide	31
ethacrynic acid	31
furosemide	31
trichlormethiazide	31
hydroflumethiazide	31
chlorthalidone	31
bendroflumethiazide	31
triamterene	31
indapamide	31
polythiazide	31
metolazone	31
torsemide	31
amphotericin b	32
nystatin	32
miconazole	32
clotrimazole	32
flucytosine	32
econazole	32
natamycin	32
ketoconazole	32
fluconazole	32
terbinafine	32
itraconazole	32
posaconazole	32
voriconazole	32
anidulafungin	32
caspofungin	32
micafungin	32
diatrizoate	33
metrizoic acid	33
metrizamide	33
iodipamide	33
iodamide	33
meglumine	33
chymopapain	33
iophendylate	33
iothalamate meglumine	33
ethiodized oil	33
iopamidol	33
iohexol	33
ioversol	33
iopromide	33
ferumoxides	33
gadoteridol	33
gadodiamide	33
iodixanol	33
iotrolan	33
ioxilan	33
gadoterate meglumine	33
ferumoxsil	33
gadobutrol	33
gadofosveset trisodium	33
gadoversetamide	33
phenylpropanolamine	34
terazosin	34
doxazosin	34
trospium chloride	34
oxybutynin	34
tamsulosin	34
alfuzosin	34
silodosin	34
tolterodine tartrate	34
darifenacin	34
solifenacin succinate	34
mirabegron	34
fesoterodine	34
vidarabine	35
thalidomide	35
pentostatin	35
cladribine	35
filgrastim	35
alemtuzumab	35
fludarabine	35
clofarabine	35
bendamustine hydrochloride	35
nelarabine	35
gemtuzumab	35
pegfilgrastim	35
ibritumomab tiuxetan	35
lenalidomide	35
pomalidomide	35
brentuximab vedotin	35
inotuzumab ozogamicin	35
blinatumomab	35
carfilzomib	35
ofatumumab	35
obinutuzumab	35
elotuzumab	35
ixazomib	35
daratumumab	35
ribavirin	36
trifluridine	36
foscarnet	36
rimantadine	36
acyclovir	36
ganciclovir	36
cidofovir	36
adefovir	36
penciclovir	36
famciclovir	36
zanamivir	36
valacyclovir	36
fomivirsen	36
peginterferon alfa-2a	36
oseltamivir	36
valganciclovir	36
entecavir	36
peramivir	36
peginterferon alfa-2b	36
telaprevir	36
telbivudine	36
simeprevir	36
sofosbuvir	36
ledipasvir	36
velpatasvir	36
voxilaprevir	36
pibrentasvir	36
cimetidine	37
sucralfate	37
ranitidine	37
omeprazole	37
famotidine	37
nizatidine	37
lansoprazole	37
rabeprazole	37
pantoprazole	37
esomeprazole	37
benzoyl peroxide	38
fluocinonide	38
clobetasol	38
desoximetasone	38
etretinate	38
desonide	38
halcinonide	38
isotretinoin	38
hydroquinone	38
calcipotriene	38
mequinol	38
acitretin	38
prednicarbate	38
azelaic acid	38
adapalene	38
imiquimod	38
monobenzone	38
alclometasone dipropionate	38
halobetasol	38
amcinonide	38
diflorasone	38
tazarotene	38
pimecrolimus	38
afamelanotide	38
cinoxacin	39
enoxacin	39
lomefloxacin	39
sparfloxacin	39
dirithromycin	39
grepafloxacin	39
gatifloxacin	39
cefpiramide	39
fidaxomicin	39
trovafloxacin	39
oritavancin	39
gemifloxacin	39
moxifloxacin	39
telithromycin	39
alatrofloxacin	39
quinupristin	39
dalfopristin	39
dalbavancin	39
delafloxacin	39
telavancin	39
retapamulin	39
ceftolozane	39
ceftaroline fosamil	39
besifloxacin	39
avibactam	39
finafloxacin	39
omadacycline	39
ozenoxacin	39
bezlotoxumab	39
cefiderocol	39
vaborbactam	39
zidovudine	40
zalcitabine	40
didanosine	40
nevirapine	40
lamivudine	40
stavudine	40
saquinavir	40
ritonavir	40
tenofovir	40
delavirdine	40
indinavir	40
amprenavir	40
enfuvirtide	40
nelfinavir	40
efavirenz	40
tipranavir	40
abacavir	40
lopinavir	40
emtricitabine	40
atazanavir sulfate	40
fosamprenavir	40
etravirine	40
darunavir	40
maraviroc	40
rilpivirine	40
raltegravir potassium	40
dolutegravir	40
cobicistat	40
ciclopirox	41
tioconazole	41
naftifine	41
sertaconazole	41
sulconazole	41
butoconazole	41
terconazole	41
butenafine	41
oxiconazole	41
luliconazole	41
efinaconazole	41
tavaborole	41
rizatriptan	42
zolmitriptan	42
naratriptan	42
frovatriptan	42
eletriptan	42
almotriptan	42
iocetamic acid	43
propoxyphene napsylate	43
talbutal	43
estrogens, conjugated synthetic b	43
interferon alfa-n3	43
thonzonium bromide	43
ubrogepant	43
ivosidenib	43

## Sheet: HClust Experiment 3 Results
Drugs	Cluster Number					Cluster Number	Number of Drugs in the cluster
chloroquine	1					1	14
amodiaquine	1					2	36
quinine	1					3	58
primaquine	1					4	38
proguanil	1					5	381
pyrimethamine	1					6	97
sulfadoxine	1					7	73
mefloquine	1					8	48
artesunate	1					9	74
halofantrine	1					10	27
artemether	1					11	31
atovaquone	1					12	26
tafenoquine	1					13	22
lumefantrine	1					14	32
morphine	2					15	28
procaine	2					16	15
lidocaine	2					17	38
methadone	2					18	87
naloxone	2					19	17
tetracaine	2					20	22
acetaminophen	2					21	32
meperidine	2					22	33
levorphanol	2					23	22
codeine	2					24	36
pentazocine	2					25	36
bupivacaine	2					26	32
dibucaine	2					27	40
etidocaine	2					28	35
naltrexone	2					29	15
mepivacaine	2					30	13
oxymorphone	2					31	31
oxycodone	2					32	16
hydrocodone	2					33	26
levallorphan	2					34	22
buprenorphine	2					35	27
butorphanol	2					36	10
dihydrocodeine	2					37	25
hydromorphone	2					38	28
nalbuphine	2					39	12
prilocaine	2					40	6
dezocine	2					41	8
tramadol	2
ziconotide	2
ropivacaine	2
ketorolac	2
chloroprocaine	2
gabapentin	2
pregabalin	2
levobupivacaine	2
tapentadol	2
metaraminol	3
epinephrine	3
digitoxin	3
propranolol	3
isoproterenol	3
phenoxybenzamine	3
theophylline	3
norepinephrine	3
reserpine	3
phentolamine	3
aminophylline	3
minoxidil	3
phenylephrine	3
methyldopa	3
adenosine	3
clonidine	3
guanethidine	3
oxprenolol	3
acebutolol	3
pindolol	3
verapamil	3
hydralazine	3
atenolol	3
trimethaphan	3
dipyridamole	3
doxapram	3
ephedrine	3
nitroglycerin	3
nifedipine	3
digoxin	3
mephentermine	3
guaifenesin	3
deslanoside	3
labetalol	3
ergoloid mesylates	3
methoxamine	3
pentolinium tartrate	3
tolazoline	3
metoprolol	3
dobutamine	3
prazosin	3
diltiazem	3
penbutolol	3
nadolol	3
nicardipine	3
nimodipine	3
esmolol	3
milrinone	3
isradipine	3
nisoldipine	3
bisoprolol	3
felodipine	3
bretylium	3
carvedilol	3
nebivolol	3
arbutamine	3
ivabradine	3
regadenoson	3
isocarboxazid	4
dopamine	4
amphetamine	4
apomorphine	4
dextroamphetamine	4
cocaine	4
imipramine	4
methysergide	4
cyproheptadine	4
mazindol	4
levodopa	4
haloperidol	4
desipramine	4
amitriptyline	4
pargyline	4
pimozide	4
amantadine	4
methamphetamine	4
carbidopa	4
tranylcypromine	4
nortriptyline	4
phenelzine	4
fenfluramine	4
clomipramine	4
tetrabenazine	4
bromocriptine	4
selegiline	4
pergolide	4
cabergoline	4
entacapone	4
rotigotine	4
pramipexole	4
tolcapone	4
ropinirole	4
rasagiline	4
safinamide	4
istradefylline	4
opicapone	4
glutathione	5
malathion	5
dihydroergotamine	5
pentagastrin	5
nitrofurazone	5
oxytocin	5
magnesium sulfate	5
diphenoxylate	5
secretin	5
propantheline	5
glycopyrrolate	5
droxidopa	5
oxymetazoline	5
naphazoline	5
methimazole	5
penicillamine	5
metoclopramide	5
sulfapyridine	5
bethanidine	5
nitrofurantoin	5
iodine	5
indomethacin	5
mafenide	5
barium sulfate	5
cysteamine	5
sulfacetamide	5
ergotamine	5
oxyphenonium	5
paromomycin	5
ritodrine	5
probenecid	5
thyrotropin	5
lactulose	5
lypressin	5
piperazine	5
chlorhexidine	5
clioquinol	5
ceruletide	5
allopurinol	5
methenamine	5
sulfamerazine	5
levamisole	5
paramethasone	5
sulfinpyrazone	5
propylthiouracil	5
guanabenz	5
deferoxamine	5
thiabendazole	5
candicidin	5
tinidazole	5
pentamidine	5
diethylcarbamazine	5
hexachlorophene	5
tiopronin	5
ethoxzolamide	5
acetylcysteine	5
piperonyl butoxide	5
loperamide	5
dimercaprol	5
isoetharine	5
propiolactone	5
pyrethrins	5
betazole	5
magnesium hydroxide	5
methylergonovine	5
sulfisoxazole	5
silver sulfadiazine	5
methazolamide	5
oxamniquine	5
iopanoic acid	5
evans blue	5
niclosamide	5
flavoxate	5
mebendazole	5
povidone-iodine	5
pentoxifylline	5
simethicone	5
sulfamethizole	5
epoprostenol	5
sodium nitrite	5
calcium gluconate	5
potassium iodide	5
praziquantel	5
permethrin	5
dinoprostone	5
guanfacine	5
alprostadil	5
plicamycin	5
flumethasone	5
midodrine	5
selenomethionine	5
furazolidone	5
ipodate	5
isosorbide	5
menthol	5
nifurtimox	5
hydroxocobalamin	5
dichlorphenamide	5
succimer	5
propyliodone	5
pyrithione	5
manganese chloride	5
dinoprost	5
bisacodyl	5
trientine	5
sodium tetradecyl sulfate	5
triclosan	5
carboprost	5
estetrol	5
sulfameter	5
tyropanoate	5
haloprogin	5
benzyl alcohol	5
selenious acid	5
sincalide	5
sodium acetate	5
lutetium	5
bentiromide	5
zinc chloride	5
phenazopyridine	5
oxyphencyclimine	5
bismuth subsalicylate	5
medrysone	5
zinc sulfate	5
dyphylline	5
ferrous sulfate	5
albendazole	5
ivermectin	5
clidinium	5
sodium phosphate	5
pirbuterol	5
polidocanol	5
hydroxystilbamidine	5
pipobroman	5
iloprost	5
sapropterin	5
masoprocol	5
mifepristone	5
miltefosine	5
octreotide	5
eflornithine	5
cisapride	5
moexipril	5
brimonidine tartrate	5
cilostazol	5
ondansetron	5
misoprostol	5
sodium carbonate	5
dyclonine	5
perflubron	5
tartaric acid	5
spirapril	5
iofetamine	5
auranofin	5
eprosartan	5
magnesium carbonate	5
diphemanil methylsulfate	5
ferric ammonium citrate	5
deflazacort	5
sodium thiosulfate	5
chromic chloride	5
fluocinolone	5
poractant alfa	5
sargramostim	5
sodium sulfate	5
olsalazine	5
granisetron	5
sumatriptan	5
ferric citrate	5
sermorelin	5
methylnaltrexone	5
gallium nitrate	5
cupric chloride	5
rifaximin	5
potassium perchlorate	5
apraclonidine	5
defibrotide	5
triclabendazole	5
deferiprone	5
pemirolast	5
trimetrexate	5
lanreotide	5
imciromab pentetate	5
colfosceril palmitate	5
beractant	5
ferrous fumarate	5
fenoldopam	5
bethanechol	5
lactitol	5
balsalazide	5
pramoxine	5
tetrahydrozoline	5
nitisinone	5
benzquinamide	5
ferric maltol	5
potassium sulfate	5
secnidazole	5
amlexanox	5
crotamiton	5
cevimeline	5
cetyl alcohol	5
miglustat	5
dexpanthenol	5
anagrelide	5
ingenol	5
bitolterol	5
methyl salicylate	5
pancrelipase	5
cyclobenzaprine	5
manganese sulfate	5
edaravone	5
benzyl benzoate	5
guanadrel	5
acetohydroxamic acid	5
oxybenzone	5
denileukin diftitox	5
perflexane	5
invert sugar	5
difenoxin	5
avobenzone	5
lithium citrate	5
docosanol	5
magnesium trisilicate	5
pegaspargase	5
valrubicin	5
benzonatate	5
dromostanolone	5
sodium lactate	5
menadiol	5
diphenidol	5
meclocycline	5
pyrvinium	5
zinc acetate	5
pegademase bovine	5
anileridine	5
butalbital	5
chloroxine	5
meprednisone	5
lodoxamide tromethamine	5
tridihexethyl	5
polyestradiol	5
ethynodiol	5
indecainide	5
levoleucovorin	5
hexocyclium	5
sulfoxone	5
cycrimine	5
potassium citrate	5
hexafluorenium	5
methixene	5
pegloticase	5
quinethazone	5
nitazoxanide	5
anisindione	5
lapyrium	5
hexylcaine	5
acetophenazine	5
migalastat	5
pirfenidone	5
bexarotene	5
ulipristal	5
aldesleukin	5
imiglucerase	5
febuxostat	5
ardeparin	5
alosetron	5
metharbital	5
octocrylene	5
metaxalone	5
epoetin alfa	5
methantheline	5
sodium citrate	5
capromab pendetide	5
bentoquatam	5
alitretinoin	5
potassium acetate	5
isopropamide iodide	5
conivaptan	5
tegaserod	5
icodextrin	5
palivizumab	5
sodium benzoate	5
tolvaptan	5
calfactant	5
fluciclovine f-18	5
clevidipine	5
prucalopride	5
pegvisomant	5
spinosad	5
deferasirox	5
alvimopan	5
metreleptin	5
darbepoetin alfa	5
mepolizumab	5
rasburicase	5
pasireotide	5
agalsidase beta	5
dexlansoprazole	5
obeticholic acid	5
macimorelin	5
bremelanotide	5
protokylol	5
piperacetazine	5
levopropoxyphene	5
tesamorelin	5
voclosporin	5
romiplostim	5
eculizumab	5
teduglutide	5
lucinactant	5
lubiprostone	5
siltuximab	5
galsulfase	5
ecallantide	5
reslizumab	5
ioflupane	5
eltrombopag	5
idursulfase	5
azilsartan	5
eliglustat	5
selexipag	5
ferric carboxymaltose	5
linaclotide	5
carglumic acid	5
necitumumab	5
rilonacept	5
triheptanoin	5
elagolix	5
crofelemer	5
levamlodipine	5
canakinumab	5
flutemetamol	5
ivacaftor	5
lumacaftor	5
eteplirsen	5
tafamidis	5
florbetapir	5
lifitegrast	5
ponesimod	5
avanafil	5
patiromer	5
taliglucerase alfa	5
peginesatide	5
relugolix	5
levomefolate calcium	5
dornase alfa	5
benralizumab	5
asfotase alfa	5
interferon gamma-1b	5
eluxadoline	5
plecanatide	5
dexrazoxane	5
telotristat	5
vericiguat	5
naloxegol	5
sarilumab	5
levalbuterol	5
doravirine	5
olaratumab	5
lesinurad	5
tipiracil	5
tenapanor	5
sucroferric oxyhydroxide	5
nusinersen	5
abaloparatide	5
valbenazine	5
sebelipase alfa	5
gilteritinib	5
patisiran	5
capmatinib	5
ozanimod	5
emicizumab	5
lusutrombopag	5
mecasermin	5
deutetrabenazine	5
bictegravir	5
brexanolone	5
naldemedine	5
cerliponase alfa	5
voxelotor	5
baloxavir	5
glutethimide	6
chlordiazepoxide	6
chlorpromazine	6
oxazepam	6
lorazepam	6
caffeine	6
diazepam	6
mephenytoin	6
prochlorperazine	6
cannabidiol	6
dronabinol	6
pentobarbital	6
disulfiram	6
meprobamate	6
flurazepam	6
benzphetamine	6
chlorphentermine	6
phentermine	6
clonazepam	6
baclofen	6
ethchlorvynol	6
phenmetrazine	6
methylphenidate	6
clorazepate dipotassium	6
secobarbital	6
diethylpropion	6
sodium oxybate	6
dextromethorphan	6
pemoline	6
temazepam	6
estazolam	6
triazolam	6
sulfaphenazole	6
meclizine	6
cyclizine	6
dantrolene	6
prazepam	6
troleandomycin	6
dimenhydrinate	6
thiethylperazine	6
chlormezanone	6
chlorphenesin	6
carisoprodol	6
chlorzoxazone	6
dicyclomine	6
doxylamine	6
methocarbamol	6
tizanidine	6
cyclothiazide	6
flumazenil	6
orlistat	6
alprazolam	6
bupropion	6
triclofos	6
zolpidem	6
fomepizole	6
nalmefene	6
nabilone	6
modafinil	6
quazepam	6
acamprosate	6
riluzole	6
sibutramine	6
lofexidine	6
dolasetron	6
atomoxetine hydrochloride	6
trimethobenzamide	6
halazepam	6
phendimetrazine	6
ethinamate	6
palonosetron	6
zaleplon	6
flibanserin	6
rescinnamine	6
vilazodone hydrochloride	6
propiomazine	6
aprepitant	6
methyprylon	6
dexmethylphenidate hydrochloride	6
fospropofol	6
tasimelteon	6
deserpidine	6
ramelteon	6
varenicline	6
incobotulinumtoxina	6
lorcaserin	6
netupitant	6
pimavanserin	6
lisdexamfetamine dimesylate	6
fosaprepitant	6
remimazolam	6
eszopiclone	6
cariprazine	6
abobotulinumtoxina	6
suvorexant	6
vortioxetine	6
brexpiprazole	6
tyrosine	7
urea	7
methylene blue	7
arginine	7
sodium chloride	7
potassium chloride	7
calcium	7
deoxycholic acid	7
cellulose	7
glycine	7
dactinomycin	7
cysteine	7
glycerol	7
acetazolamide	7
ascorbic acid	7
folic acid	7
uridine	7
xylose	7
calcium carbonate	7
pyridoxine	7
dimethyl sulfoxide	7
mannitol	7
lipase	7
ammonium chloride	7
choline	7
calcium chloride	7
tromethamine	7
riboflavin	7
vitamin a	7
colchicine	7
biotin	7
sorbitol	7
hydroxyurea	7
lanthanum	7
thiamine	7
aluminum	7
silver	7
idoxuridine	7
magnesium oxide	7
furosemide	7
mersalyl	7
uracil	7
amiloride	7
inulin	7
polytetrafluoroethylene	7
bumetanide	7
betaine	7
gentian violet	7
pantothenic acid	7
vitamin e	7
sodium fluoride	7
floxuridine	7
trypan blue	7
zinc oxide	7
methoxsalen	7
beta carotene	7
sodium bicarbonate	7
gramicidin	7
trioxsalen	7
safflower oil	7
magnesium chloride	7
citric acid	7
lactic acid	7
guanidine	7
cholic acid	7
fluorescein	7
soybean oil	7
olive oil	7
phosphoric acid	7
ethanolamine	7
titanium dioxide	7
alpha-tocopherol	7
polyethylene	7
cyclophosphamide	8
ifosfamide	8
methotrexate	8
asparaginase	8
altretamine	8
lomustine	8
mercaptopurine	8
vinblastine	8
doxorubicin	8
fluorouracil	8
chlorambucil	8
mechlorethamine	8
thiotepa	8
daunorubicin	8
cytarabine	8
procarbazine	8
melphalan	8
busulfan	8
thioguanine	8
vincristine	8
leucovorin	8
carmustine	8
dacarbazine	8
mesna	8
cisplatin	8
bleomycin	8
etoposide	8
teniposide	8
amifostine	8
mitomycin	8
idarubicin	8
paclitaxel	8
epirubicin	8
carboplatin	8
mitoxantrone	8
filgrastim	8
vinorelbine	8
irinotecan	8
gemcitabine	8
topotecan	8
docetaxel	8
temozolomide	8
pemetrexed	8
oxaliplatin	8
trabectedin	8
capecitabine	8
pegfilgrastim	8
olaparib	8
cortisone	9
hydrocortisone	9
testosterone	9
estradiol	9
menotropins	9
betamethasone	9
prednisone	9
metyrapone	9
prednisolone	9
methylprednisolone	9
mestranol	9
megestrol	9
progesterone	9
methyltestosterone	9
diethylstilbestrol	9
triamcinolone	9
mitotane	9
clomiphene	9
estrone	9
ethinyl estradiol	9
norgestrel	9
norethindrone	9
desoxycorticosterone	9
aminoglutethimide	9
nandrolone	9
quinestrol	9
dienestrol	9
cosyntropin	9
oxymetholone	9
fludrocortisone	9
dydrogesterone	9
danazol	9
medroxyprogesterone	9
oxandrolone	9
ethylestrenol	9
chlorotrianisene	9
norethynodrel	9
estramustine	9
fluoxymesterone	9
stanozolol	9
flutamide	9
testolactone	9
levonorgestrel	9
desogestrel	9
estropipate	9
trilostane	9
goserelin	9
triptorelin pamoate	9
leuprolide	9
nilutamide	9
nafarelin	9
dienogest	9
etonogestrel	9
cetrorelix	9
norgestimate	9
raloxifene hydrochloride	9
toremifene	9
bicalutamide	9
ganirelix	9
letrozole	9
exemestane	9
histrelin	9
drospirenone	9
norelgestromin	9
anastrozole	9
abiraterone	9
ospemifene	9
abarelix	9
bazedoxifene	9
estrogens, conjugated synthetic a	9
urofollitropin	9
cabazitaxel	9
apalutamide	9
darolutamide	9
ipratropium	10
metaproterenol	10
albuterol	10
cromolyn sodium	10
beclomethasone	10
terbutaline	10
ketotifen	10
methacholine chloride	10
budesonide	10
nedocromil	10
azelastine	10
flunisolide	10
zileuton	10
zafirlukast	10
salmeterol xinafoate	10
formoterol fumarate	10
fluticasone	10
mometasone furoate	10
montelukast	10
tiotropium bromide	10
ciclesonide	10
roflumilast	10
omalizumab	10
indacaterol	10
aclidinium bromide	10
olodaterol	10
vilanterol	10
methoxyflurane	11
enflurane	11
isoflurane	11
halothane	11
ketamine	11
droperidol	11
pancuronium	11
thiopental	11
succinylcholine	11
fentanyl	11
methohexital	11
etomidate	11
thiamylal	11
sufentanil	11
midazolam	11
propofol	11
metocurine	11
atracurium	11
sevoflurane	11
alfentanil	11
desflurane	11
mivacurium	11
pipecuronium	11
rocuronium	11
vecuronium bromide	11
doxacurium	11
remifentanil	11
rapacuronium	11
cisatracurium	11
dexmedetomidine	11
sugammadex	11
nicotine	12
histamine	12
acetylcholine	12
atropine	12
gallamine triethiodide	12
scopolamine	12
isoflurophate	12
carbachol	12
pilocarpine	12
tubocurarine	12
neostigmine	12
mecamylamine	12
edrophonium	12
echothiophate iodide	12
pyridostigmine bromide	12
galantamine	12
capsaicin	12
tacrine	12
memantine	12
ambenonium chloride	12
pralidoxime	12
amifampridine	12
decamethonium	12
donepezil	12
rivastigmine	12
demecarium	12
spironolactone	13
saralasin	13
captopril	13
benazepril	13
amlodipine	13
lisinopril	13
perindopril	13
enalapril	13
losartan	13
icatibant	13
enalaprilat	13
ramipril	13
fosinopril	13
quinapril	13
trandolapril	13
candesartan	13
valsartan	13
irbesartan	13
telmisartan	13
eplerenone	13
olmesartan	13
aliskiren	13
glucagon	14
insulin	14
diazoxide	14
chlorpropamide	14
tolbutamide	14
streptozocin	14
glyburide	14
acetohexamide	14
glipizide	14
metformin	14
tolazamide	14
exenatide	14
acarbose	14
pioglitazone	14
pinacidil	14
miglitol	14
glimepiride	14
troglitazone	14
repaglinide	14
nateglinide	14
rosiglitazone	14
pramlintide	14
liraglutide	14
lixisenatide	14
sitagliptin phosphate	14
saxagliptin	14
alogliptin	14
linagliptin	14
dulaglutide	14
canagliflozin	14
empagliflozin	14
semaglutide	14
phenytoin	15
primidone	15
carbamazepine	15
ethosuximide	15
valproic acid	15
trimethadione	15
phensuximide	15
vigabatrin	15
clobazam	15
stiripentol	15
methsuximide	15
rufinamide	15
zonisamide	15
tiagabine	15
lamotrigine	15
felbamate	15
oxcarbazepine	15
levetiracetam	15
fosphenytoin	15
topiramate	15
phenacemide	15
paramethadione	15
ezogabine	15
lacosamide	15
ethotoin	15
brivaracetam	15
perampanel	15
eslicarbazepine	15
quinidine	16
procainamide	16
sotalol	16
amiodarone	16
disopyramide	16
mexiletine	16
tocainide	16
propafenone	16
flecainide	16
bepridil	16
dofetilide	16
moricizine	16
ibutilide	16
ranolazine	16
dronedarone	16
penicillin v	17
carbenicillin	17
ticarcillin	17
cloxacillin	17
cephradine	17
cephalexin	17
cephalothin	17
cephapirin	17
nafcillin	17
dicloxacillin	17
cephaloglycin	17
cyclacillin	17
amdinocillin	17
cefoxitin	17
cefamandole	17
cefaclor	17
netilmicin	17
azlocillin	17
mezlocillin	17
bacampicillin	17
hetacillin	17
cefotiam	17
ceforanide	17
cefoperazone	17
ceftizoxime	17
aztreonam	17
cefpodoxime	17
ceftibuten	17
cefprozil	17
cefdinir	17
cefixime	17
cefotetan	17
cefmetazole	17
cefmenoxime	17
loracarbef	17
moxalactam	17
cefonicid	17
cefditoren	17
dexamethasone	18
niacinamide	18
tretinoin	18
thalidomide	18
tamoxifen	18
azacitidine	18
decitabine	18
midostaurin	18
rifabutin	18
sirolimus	18
becaplermin	18
arsenic trioxide	18
clofarabine	18
bendamustine hydrochloride	18
fulvestrant	18
romidepsin	18
vorinostat	18
imatinib mesylate	18
cetuximab	18
nelarabine	18
everolimus	18
trastuzumab	18
lonafarnib	18
bortezomib	18
erlotinib hydrochloride	18
temsirolimus	18
gemtuzumab	18
gefitinib	18
eribulin	18
ibritumomab tiuxetan	18
panitumumab	18
ixabepilone	18
lenalidomide	18
lapatinib	18
pomalidomide	18
sorafenib	18
sunitinib	18
bosutinib	18
brentuximab vedotin	18
inotuzumab ozogamicin	18
belinostat	18
tofacitinib	18
pertuzumab	18
dasatinib	18
panobinostat	18
palbociclib	18
axitinib	18
ado-trastuzumab emtansine	18
ipilimumab	18
blinatumomab	18
pazopanib	18
crizotinib	18
afatinib	18
fostamatinib	18
carfilzomib	18
lenvatinib	18
ofatumumab	18
nintedanib	18
rucaparib	18
obinutuzumab	18
ramucirumab	18
cabozantinib	18
elotuzumab	18
niraparib	18
ponatinib	18
vemurafenib	18
ixazomib	18
idelalisib	18
nivolumab	18
tivozanib	18
daratumumab	18
regorafenib	18
trametinib	18
dabrafenib	18
venetoclax	18
pembrolizumab	18
ceritinib	18
talazoparib	18
ribociclib	18
atezolizumab	18
baricitinib	18
encorafenib	18
durvalumab	18
avelumab	18
entrectinib	18
acalabrutinib	18
osimertinib	18
trifluoperazine	19
thiothixene	19
thioridazine	19
fluphenazine	19
perphenazine	19
mesoridazine	19
promazine	19
chlorprothixene	19
procyclidine	19
triflupromazine	19
orphenadrine	19
trihexyphenidyl	19
benztropine	19
loxapine	19
molindone	19
biperiden	19
trimeprazine	19
clofibrate	20
colestipol	20
dextrothyroxine	20
probucol	20
fenofibrate	20
niacin	20
gemfibrozil	20
tyloxapol	20
lovastatin	20
simvastatin	20
pravastatin	20
fluvastatin	20
fenofibric acid	20
atorvastatin	20
cerivastatin	20
colesevelam hydrochloride	20
pitavastatin	20
ezetimibe	20
rosuvastatin calcium	20
mipomersen	20
alirocumab	20
evolocumab	20
diphenhydramine	21
promethazine	21
pyrilamine	21
chlorpheniramine	21
tripelennamine	21
clemastine	21
triprolidine	21
antazoline	21
hydroxyzine	21
brompheniramine	21
pheniramine	21
cetirizine	21
loratadine	21
levocabastine	21
epinastine	21
olopatadine hydrochloride	21
acrivastine	21
dexchlorpheniramine	21
carbinoxamine	21
pseudoephedrine	21
azatadine	21
emedastine	21
bromodiphenhydramine	21
desloratadine	21
diphenylpyraline	21
dexbrompheniramine	21
methdilazine	21
buclizine	21
fexofenadine	21
bepotastine	21
levocetirizine	21
alcaftadine	21
trimethoprim	22
chloramphenicol	22
penicillin g benzathine	22
rifampin	22
streptomycin	22
cycloserine	22
tetracycline	22
spectinomycin	22
kanamycin	22
isoniazid	22
oxytetracycline	22
chlortetracycline	22
novobiocin	22
lincomycin	22
dapsone	22
sulfadiazine	22
erythromycin	22
neomycin	22
sulfamethoxazole	22
pyrazinamide	22
penicillin g procaine	22
aminosalicylic acid	22
bacitracin	22
ethambutol	22
methacycline	22
ethionamide	22
demeclocycline	22
capreomycin	22
viomycin	22
clofazimine	22
rifapentine	22
sulfanilamide	22
bedaquiline	22
ibuprofen	23
phenylbutazone	23
flurbiprofen	23
tolmetin	23
oxyphenbutazone	23
mefenamic acid	23
ketoprofen	23
naproxen	23
sulindac	23
diclofenac	23
fenoprofen	23
diflunisal	23
suprofen	23
piroxicam	23
etodolac	23
nabumetone	23
carprofen	23
oxaprozin	23
meloxicam	23
celecoxib	23
rofecoxib	23
valdecoxib	23
heparin	24
tranexamic acid	24
fibrinolysin	24
warfarin	24
aspirin	24
aprotinin	24
vitamin k	24
phenprocoumon	24
aminocaproic acid	24
phenindione	24
dicumarol	24
ticlopidine	24
danaparoid	24
bivalirudin	24
reteplase	24
desirudin	24
clopidogrel	24
argatroban	24
tirofiban	24
enoxaparin	24
dalteparin	24
eptifibatide	24
abciximab	24
tinzaparin	24
cangrelor	24
tenecteplase	24
prasugrel hydrochloride	24
fondaparinux	24
dabigatran	24
rivaroxaban	24
ticagrelor	24
apixaban	24
vorapaxar	24
edoxaban	24
betrixaban	24
idarucizumab	24
ampicillin	25
amoxicillin	25
doxycycline	25
methicillin	25
tobramycin	25
oxacillin	25
cefazolin	25
vancomycin	25
metronidazole	25
clindamycin	25
amikacin	25
fosfomycin	25
minocycline	25
cefuroxime	25
colistin	25
piperacillin	25
cefotaxime	25
ceftazidime	25
ciprofloxacin	25
azithromycin	25
imipenem	25
cilastatin	25
meropenem	25
ofloxacin	25
sulbactam	25
ceftriaxone	25
clarithromycin	25
mupirocin	25
tazobactam	25
daptomycin	25
cefepime	25
levofloxacin	25
linezolid	25
doripenem	25
tigecycline	25
ertapenem	25
levobunolol	26
indocyanine green	26
cyclopentolate	26
timolol	26
metipranolol	26
betaxolol	26
fluprednisolone	26
carteolol	26
tropicamide	26
propoxycaine	26
fluorometholone	26
dipivefrin	26
dapiprazole	26
perflutren	26
latanoprost	26
benoxinate	26
loteprednol etabonate	26
homatropine	26
dorzolamide	26
bromfenac	26
rimexolone	26
difluprednate	26
verteporfin	26
brinzolamide	26
nepafenac	26
bimatoprost	26
travoprost	26
bevacizumab	26
tafluprost	26
pegaptanib	26
ranibizumab	26
aflibercept	26
sulfasalazine	27
azathioprine	27
vidarabine	27
mycophenolic acid	27
hydroxychloroquine	27
pentostatin	27
cyclosporine	27
tacrolimus	27
cladribine	27
abatacept	27
interferon beta-1b	27
interferon beta-1a	27
mesalamine	27
alemtuzumab	27
fludarabine	27
dimethyl fumarate	27
leflunomide	27
glatiramer acetate	27
infliximab	27
daclizumab	27
etanercept	27
rituximab	27
fingolimod hydrochloride	27
basiliximab	27
peginterferon beta-1a	27
adalimumab	27
natalizumab	27
certolizumab pegol	27
tocilizumab	27
ustekinumab	27
apremilast	27
belimumab	27
teriflunomide	27
golimumab	27
ocrelizumab	27
vedolizumab	27
ixekizumab	27
secukinumab	27
brodalumab	27
guselkumab	27
nalidixic acid	28
cinoxacin	28
enoxacin	28
norfloxacin	28
lomefloxacin	28
sparfloxacin	28
dirithromycin	28
grepafloxacin	28
gatifloxacin	28
cefpiramide	28
fidaxomicin	28
trovafloxacin	28
oritavancin	28
gemifloxacin	28
moxifloxacin	28
telithromycin	28
alatrofloxacin	28
quinupristin	28
dalfopristin	28
dalbavancin	28
delafloxacin	28
telavancin	28
obiltoxaximab	28
retapamulin	28
ceftolozane	28
ceftaroline fosamil	28
besifloxacin	28
avibactam	28
raxibacumab	28
finafloxacin	28
omadacycline	28
ozenoxacin	28
bezlotoxumab	28
cefiderocol	28
vaborbactam	28
parathyroid hormone	29
calcitonin	29
cholecalciferol	29
calcitriol	29
teriparatide	29
calcifediol	29
pamidronate	29
alendronate	29
zoledronic acid	29
paricalcitol	29
sevelamer	29
lanthanum carbonate	29
calcium acetate	29
cinacalcet	29
denosumab	29
hydrochlorothiazide	30
methyclothiazide	30
chlorothiazide	30
ethacrynic acid	30
trichlormethiazide	30
hydroflumethiazide	30
chlorthalidone	30
bendroflumethiazide	30
triamterene	30
indapamide	30
polythiazide	30
metolazone	30
torsemide	30
doxepin	31
clozapine	31
maprotiline	31
protriptyline	31
trazodone	31
trimipramine	31
amoxapine	31
viloxazine	31
fluoxetine	31
amisulpride	31
lithium carbonate	31
citalopram	31
sertraline	31
risperidone	31
fluvoxamine	31
paliperidone palmitate	31
paroxetine	31
buspirone	31
nefazodone	31
milnacipran	31
quetiapine fumarate	31
olanzapine	31
venlafaxine hydrochloride	31
asenapine	31
mirtazapine	31
duloxetine hydrochloride	31
ziprasidone	31
iloperidone	31
aripiprazole	31
desvenlafaxine succinate	31
lurasidone hydrochloride	31
amphotericin b	32
nystatin	32
miconazole	32
clotrimazole	32
flucytosine	32
econazole	32
natamycin	32
ketoconazole	32
fluconazole	32
terbinafine	32
itraconazole	32
posaconazole	32
voriconazole	32
anidulafungin	32
caspofungin	32
micafungin	32
diatrizoate	33
metrizoic acid	33
metrizamide	33
chlormerodrin	33
iodipamide	33
iodamide	33
meglumine	33
chymopapain	33
iophendylate	33
iothalamate meglumine	33
ethiodized oil	33
iopamidol	33
iohexol	33
ioversol	33
iopromide	33
ferumoxides	33
gadoteridol	33
gadodiamide	33
iodixanol	33
iotrolan	33
ioxilan	33
gadoterate meglumine	33
ferumoxsil	33
gadobutrol	33
gadofosveset trisodium	33
gadoversetamide	33
phenylpropanolamine	34
terazosin	34
doxazosin	34
finasteride	34
trospium chloride	34
oxybutynin	34
tamsulosin	34
alfuzosin	34
bosentan	34
silodosin	34
tolterodine tartrate	34
sildenafil citrate	34
darifenacin	34
dutasteride	34
treprostinil	34
tadalafil	34
solifenacin succinate	34
ambrisentan	34
mirabegron	34
fesoterodine	34
macitentan	34
riociguat	34
ribavirin	35
trifluridine	35
foscarnet	35
rimantadine	35
acyclovir	35
ganciclovir	35
cidofovir	35
adefovir	35
penciclovir	35
famciclovir	35
zanamivir	35
valacyclovir	35
fomivirsen	35
peginterferon alfa-2a	35
oseltamivir	35
valganciclovir	35
entecavir	35
peramivir	35
peginterferon alfa-2b	35
telaprevir	35
telbivudine	35
simeprevir	35
sofosbuvir	35
ledipasvir	35
velpatasvir	35
voxilaprevir	35
pibrentasvir	35
cimetidine	36
sucralfate	36
ranitidine	36
omeprazole	36
famotidine	36
nizatidine	36
lansoprazole	36
rabeprazole	36
pantoprazole	36
esomeprazole	36
benzoyl peroxide	37
fluocinonide	37
clobetasol	37
desoximetasone	37
etretinate	37
desonide	37
halcinonide	37
isotretinoin	37
hydroquinone	37
calcipotriene	37
mequinol	37
acitretin	37
prednicarbate	37
azelaic acid	37
adapalene	37
imiquimod	37
monobenzone	37
alclometasone dipropionate	37
halobetasol	37
amcinonide	37
diflorasone	37
clocortolone pivalate	37
tazarotene	37
pimecrolimus	37
afamelanotide	37
zidovudine	38
zalcitabine	38
didanosine	38
nevirapine	38
lamivudine	38
stavudine	38
saquinavir	38
ritonavir	38
tenofovir	38
delavirdine	38
indinavir	38
amprenavir	38
enfuvirtide	38
nelfinavir	38
efavirenz	38
tipranavir	38
abacavir	38
lopinavir	38
emtricitabine	38
atazanavir sulfate	38
fosamprenavir	38
etravirine	38
darunavir	38
maraviroc	38
rilpivirine	38
raltegravir potassium	38
dolutegravir	38
cobicistat	38
ciclopirox	39
tioconazole	39
naftifine	39
sertaconazole	39
sulconazole	39
butoconazole	39
terconazole	39
butenafine	39
oxiconazole	39
luliconazole	39
efinaconazole	39
tavaborole	39
rizatriptan	40
zolmitriptan	40
naratriptan	40
frovatriptan	40
eletriptan	40
almotriptan	40
iocetamic acid	41
propoxyphene napsylate	41
talbutal	41
estrogens, conjugated synthetic b	41
interferon alfa-n3	41
thonzonium bromide	41
ubrogepant	41
ivosidenib	41

## Sheet: K-means Experiment 1 Results
Drugs	Cluster Number
nitrofurazone	1
chloramphenicol	1								Cluster Number	Number of Drugs in the cluster
penicillin g benzathine	1								1	79
rifampin	1								2	23
streptomycin	1								3	79	40
nalidixic acid	1								4	40
nitrofurantoin	1								5	150
cycloserine	1								6	63
tetracycline	1								7	43
spectinomycin	1								8	75
doxycycline	1								9	36
kanamycin	1								10	26
isoniazid	1								11	39
paromomycin	1								12	27
oxytetracycline	1								13	16
chlortetracycline	1								14	33
novobiocin	1								15	41
lincomycin	1								16	33
chlorhexidine	1								17	38
sulfadiazine	1								18	58
erythromycin	1								19	40
neomycin	1								20	27
cephapirin	1								21	34
metronidazole	1								22	459
pyrazinamide	1								23	42
gentian violet	1								24	31
penicillin g procaine	1								25	137
bacitracin	1									1669
ethambutol	1
methacycline	1
sulfisoxazole	1
silver sulfadiazine	1
ethionamide	1
demeclocycline	1
minocycline	1
povidone-iodine	1
sulfamethizole	1
cinoxacin	1
capreomycin	1
viomycin	1
clofazimine	1
furazolidone	1
bacampicillin	1
enoxacin	1
azithromycin	1
cefpodoxime	1
ceftibuten	1
cefprozil	1
cefdinir	1
clarithromycin	1
mupirocin	1
rifapentine	1
lomefloxacin	1
sparfloxacin	1
dirithromycin	1
grepafloxacin	1
sulfanilamide	1
gatifloxacin	1
loracarbef	1
cefpiramide	1
cefonicid	1
cefditoren	1
trovafloxacin	1
doripenem	1
oritavancin	1
gemifloxacin	1
telithromycin	1
quinupristin	1
dalfopristin	1
dalbavancin	1
delafloxacin	1
telavancin	1
bedaquiline	1
retapamulin	1
ceftolozane	1
ceftaroline fosamil	1
besifloxacin	1
avibactam	1
cefiderocol	1
paramethasone	2
benzoyl peroxide	2
fluprednisolone	2
fluocinonide	2
flumethasone	2
clobetasol	2
desoximetasone	2
etretinate	2
desonide	2
halcinonide	2
calcipotriene	2
acitretin	2
prednicarbate	2
azelaic acid	2
adapalene	2
dexpanthenol	2
alclometasone dipropionate	2
halobetasol	2
amcinonide	2
diflorasone	2
clocortolone pivalate	2
tazarotene	2
pimecrolimus	2
metaraminol	3
epinephrine	3
procaine	3
digitoxin	3
propranolol	3
isoproterenol	3
phenoxybenzamine	3
dihydroergotamine	3
theophylline	3
quinidine	3
procainamide	3
phentolamine	3
aminophylline	3
magnesium sulfate	3
metaproterenol	3
minoxidil	3
phenylephrine	3
methyldopa	3
guanethidine	3
oxprenolol	3
acebutolol	3
sotalol	3
pindolol	3
verapamil	3
ergotamine	3
diazoxide	3
saralasin	3
trimethaphan	3
dipyridamole	3
amiodarone	3
chlorothiazide	3
ephedrine	3
furosemide	3
trichlormethiazide	3
nitroglycerin	3
nifedipine	3
digoxin	3
mephentermine	3
labetalol	3
disopyramide	3
ergoloid mesylates	3
methoxamine	3
desoxycorticosterone	3
guanabenz	3
pentolinium tartrate	3
tolazoline	3
mexiletine	3
metoprolol	3
dobutamine	3
triamterene	3
glyburide	3
prazosin	3
diltiazem	3
epoprostenol	3
penbutolol	3
nadolol	3
polythiazide	3
tocainide	3
propafenone	3
flecainide	3
nicardipine	3
iloprost	3
bepridil	3
dofetilide	3
nimodipine	3
esmolol	3
milrinone	3
isradipine	3
nisoldipine	3
moricizine	3
bretylium	3
pinacidil	3
ibutilide	3
fenoldopam	3
ranolazine	3
ivabradine	3
bosentan	3
dronedarone	3
sildenafil citrate	3
niacinamide	4
fluorouracil	4
leucovorin	4
dacarbazine	4
tamoxifen	4
cisplatin	4
paclitaxel	4
epirubicin	4
decitabine	4
carboplatin	4
sirolimus	4
vinorelbine	4
irinotecan	4
gemcitabine	4
topotecan	4
arsenic trioxide	4
docetaxel	4
temozolomide	4
pemetrexed	4
oxaliplatin	4
vorinostat	4
imatinib mesylate	4
cetuximab	4
everolimus	4
capecitabine	4
trastuzumab	4
bortezomib	4
erlotinib hydrochloride	4
temsirolimus	4
gefitinib	4
panitumumab	4
bevacizumab	4
lapatinib	4
sorafenib	4
sunitinib	4
dasatinib	4
ipilimumab	4
pazopanib	4
nivolumab	4
pembrolizumab	4
chloroquine	5
amodiaquine	5
propantheline	5
betamethasone	5
sulfasalazine	5
azathioprine	5
metoclopramide	5
barium sulfate	5
prednisolone	5
calcitonin	5
methylprednisolone	5
lactulose	5
dapsone	5
triamcinolone	5
diatrizoate	5
levamisole	5
primaquine	5
indocyanine green	5
tinidazole	5
pentamidine	5
diethylcarbamazine	5
metrizoic acid	5
metrizamide	5
proguanil	5
pyrimethamine	5
ribavirin	5
cimetidine	5
mebendazole	5
pentoxifylline	5
meglumine	5
simethicone	5
praziquantel	5
sucralfate	5
mycophenolic acid	5
ranitidine	5
chymopapain	5
midodrine	5
hydroxychloroquine	5
iothalamate meglumine	5
ethiodized oil	5
sulfadoxine	5
prilocaine	5
foscarnet	5
bisacodyl	5
sodium tetradecyl sulfate	5
mefloquine	5
teriparatide	5
calcifediol	5
albendazole	5
iopamidol	5
polidocanol	5
cyclosporine	5
tacrolimus	5
octreotide	5
omeprazole	5
isotretinoin	5
cisapride	5
abatacept	5
iohexol	5
famotidine	5
acyclovir	5
ondansetron	5
ganciclovir	5
misoprostol	5
cabergoline	5
nizatidine	5
artesunate	5
interferon beta-1b	5
interferon beta-1a	5
iofetamine	5
pamidronate	5
halofantrine	5
mesalamine	5
ioversol	5
iopromide	5
artemether	5
cidofovir	5
olsalazine	5
lansoprazole	5
rabeprazole	5
granisetron	5
pantoprazole	5
atovaquone	5
alendronate	5
rifaximin	5
lanreotide	5
gadoteridol	5
imiquimod	5
gadodiamide	5
iodixanol	5
anagrelide	5
pegaspargase	5
leflunomide	5
gadoterate meglumine	5
glatiramer acetate	5
valacyclovir	5
infliximab	5
verteporfin	5
daclizumab	5
gadobutrol	5
etanercept	5
imiglucerase	5
febuxostat	5
palonosetron	5
fingolimod hydrochloride	5
epoetin alfa	5
lumefantrine	5
sevelamer	5
oseltamivir	5
tegaserod	5
gadofosveset trisodium	5
palivizumab	5
basiliximab	5
aprepitant	5
tolvaptan	5
prucalopride	5
lanthanum carbonate	5
pegvisomant	5
valganciclovir	5
esomeprazole	5
darbepoetin alfa	5
mepolizumab	5
adalimumab	5
cinacalcet	5
rasburicase	5
agalsidase beta	5
natalizumab	5
certolizumab pegol	5
tocilizumab	5
tofacitinib	5
romiplostim	5
eculizumab	5
denosumab	5
pegaptanib	5
ranibizumab	5
ustekinumab	5
apremilast	5
incobotulinumtoxina	5
belimumab	5
eltrombopag	5
ferric carboxymaltose	5
golimumab	5
aflibercept	5
vedolizumab	5
canakinumab	5
abobotulinumtoxina	5
ixekizumab	5
secukinumab	5
ledipasvir	5
brodalumab	5
altretamine	6
estramustine	6
midostaurin	6
nilutamide	6
sargramostim	6
clofarabine	6
toremifene	6
bicalutamide	6
exemestane	6
fulvestrant	6
romidepsin	6
bexarotene	6
anastrozole	6
abiraterone	6
zoledronic acid	6
trabectedin	6
nelarabine	6
lonafarnib	6
gemtuzumab	6
eribulin	6
ixabepilone	6
pomalidomide	6
bosutinib	6
brentuximab vedotin	6
inotuzumab ozogamicin	6
belinostat	6
pertuzumab	6
panobinostat	6
palbociclib	6
axitinib	6
ado-trastuzumab emtansine	6
blinatumomab	6
crizotinib	6
afatinib	6
carfilzomib	6
lenvatinib	6
ofatumumab	6
necitumumab	6
nintedanib	6
rucaparib	6
olaparib	6
obinutuzumab	6
ramucirumab	6
cabozantinib	6
elotuzumab	6
ponatinib	6
vemurafenib	6
ixazomib	6
idelalisib	6
cabazitaxel	6
tivozanib	6
daratumumab	6
regorafenib	6
trametinib	6
dabrafenib	6
venetoclax	6
ceritinib	6
talazoparib	6
ribociclib	6
atezolizumab	6
durvalumab	6
avelumab	6
osimertinib	6
cyclophosphamide	7
ifosfamide	7
methotrexate	7
asparaginase	7
prednisone	7
hydroxyurea	7
lomustine	7
mercaptopurine	7
vinblastine	7
doxorubicin	7
chlorambucil	7
mechlorethamine	7
thiotepa	7
daunorubicin	7
cytarabine	7
procarbazine	7
vidarabine	7
melphalan	7
busulfan	7
thioguanine	7
floxuridine	7
vincristine	7
carmustine	7
mesna	7
thalidomide	7
bleomycin	7
azacitidine	7
etoposide	7
teniposide	7
amifostine	7
mitomycin	7
idarubicin	7
pentostatin	7
cladribine	7
mitoxantrone	7
filgrastim	7
alemtuzumab	7
fludarabine	7
bendamustine hydrochloride	7
rituximab	7
pegfilgrastim	7
ibritumomab tiuxetan	7
lenalidomide	7
oxazepam	8
phenytoin	8
primidone	8
carbamazepine	8
ethosuximide	8
valproic acid	8
mephenytoin	8
trimethadione	8
methadone	8
cannabidiol	8
disulfiram	8
amantadine	8
carbidopa	8
flurazepam	8
clonazepam	8
clorazepate dipotassium	8
sodium oxybate	8
dextromethorphan	8
pemoline	8
temazepam	8
triazolam	8
galantamine	8
prazepam	8
viloxazine	8
guanfacine	8
tacrine	8
vigabatrin	8
clobazam	8
stiripentol	8
memantine	8
pergolide	8
rufinamide	8
zonisamide	8
entacapone	8
zolpidem	8
sumatriptan	8
tiagabine	8
gabapentin	8
lamotrigine	8
rotigotine	8
felbamate	8
quazepam	8
acamprosate	8
riluzole	8
pramipexole	8
oxcarbazepine	8
sibutramine	8
donepezil	8
levetiracetam	8
ropinirole	8
asenapine	8
rivastigmine	8
fosphenytoin	8
rasagiline	8
topiramate	8
ezogabine	8
desvenlafaxine succinate	8
rizatriptan	8
zaleplon	8
zolmitriptan	8
pregabalin	8
vilazodone hydrochloride	8
frovatriptan	8
eletriptan	8
lacosamide	8
almotriptan	8
brivaracetam	8
ramelteon	8
varenicline	8
lisdexamfetamine dimesylate	8
lurasidone hydrochloride	8
eszopiclone	8
cariprazine	8
perampanel	8
vortioxetine	8
zidovudine	9
zalcitabine	9
didanosine	9
nevirapine	9
lamivudine	9
stavudine	9
adefovir	9
saquinavir	9
ritonavir	9
tenofovir	9
delavirdine	9
indinavir	9
amprenavir	9
enfuvirtide	9
nelfinavir	9
efavirenz	9
peginterferon alfa-2a	9
tipranavir	9
abacavir	9
lopinavir	9
emtricitabine	9
atazanavir sulfate	9
entecavir	9
peginterferon alfa-2b	9
fosamprenavir	9
etravirine	9
darunavir	9
telaprevir	9
telbivudine	9
maraviroc	9
rilpivirine	9
raltegravir potassium	9
simeprevir	9
dolutegravir	9
cobicistat	9
sofosbuvir	9
amphotericin b	10
nystatin	10
miconazole	10
clotrimazole	10
flucytosine	10
econazole	10
natamycin	10
ketoconazole	10
fluconazole	10
terbinafine	10
ciclopirox	10
tioconazole	10
naftifine	10
itraconazole	10
sertaconazole	10
sulconazole	10
terconazole	10
butenafine	10
oxiconazole	10
posaconazole	10
voriconazole	10
anidulafungin	10
caspofungin	10
luliconazole	10
micafungin	10
efinaconazole	10
ipratropium	11
albuterol	11
pyrilamine	11
chlorpheniramine	11
cromolyn sodium	11
beclomethasone	11
clemastine	11
triprolidine	11
terbutaline	11
brompheniramine	11
ketotifen	11
methacholine chloride	11
budesonide	11
nedocromil	11
cetirizine	11
loratadine	11
azelastine	11
flunisolide	11
zileuton	11
zafirlukast	11
levocabastine	11
salmeterol xinafoate	11
formoterol fumarate	11
epinastine	11
olopatadine hydrochloride	11
acrivastine	11
fluticasone	11
mometasone furoate	11
desloratadine	11
montelukast	11
fexofenadine	11
tiotropium bromide	11
ciclesonide	11
roflumilast	11
omalizumab	11
levocetirizine	11
indacaterol	11
aclidinium bromide	11
vilanterol	11
isocarboxazid	12
glutethimide	12
trifluoperazine	12
prochlorperazine	12
diphenhydramine	12
promethazine	12
meprobamate	12
thiothixene	12
thioridazine	12
fluphenazine	12
perphenazine	12
mesoridazine	12
promazine	12
chlorprothixene	12
procyclidine	12
phenmetrazine	12
triflupromazine	12
secobarbital	12
orphenadrine	12
trihexyphenidyl	12
hydroxyzine	12
benztropine	12
loxapine	12
molindone	12
biperiden	12
trimeprazine	12
thiethylperazine	12
phenylpropanolamine	13
terazosin	13
doxazosin	13
finasteride	13
trospium chloride	13
oxybutynin	13
tamsulosin	13
alfuzosin	13
silodosin	13
tolterodine tartrate	13
darifenacin	13
dutasteride	13
tadalafil	13
solifenacin succinate	13
mirabegron	13
fesoterodine	13
ibuprofen	14
phenylbutazone	14
acetaminophen	14
codeine	14
flurbiprofen	14
tolmetin	14
oxyphenbutazone	14
mefenamic acid	14
ketoprofen	14
naproxen	14
oxymorphone	14
oxycodone	14
hydrocodone	14
buprenorphine	14
sulindac	14
diclofenac	14
dihydrocodeine	14
hydromorphone	14
fenoprofen	14
diflunisal	14
tramadol	14
suprofen	14
piroxicam	14
etodolac	14
ketorolac	14
chloroprocaine	14
nabumetone	14
carprofen	14
meloxicam	14
celecoxib	14
rofecoxib	14
valdecoxib	14
tapentadol	14
chlorpropamide	15
glipizide	15
colestipol	15
metformin	15
probucol	15
fenofibrate	15
gemfibrozil	15
exenatide	15
acarbose	15
lovastatin	15
simvastatin	15
pravastatin	15
orlistat	15
pioglitazone	15
miglitol	15
fluvastatin	15
glimepiride	15
troglitazone	15
fenofibric acid	15
atorvastatin	15
repaglinide	15
nateglinide	15
rosiglitazone	15
pramlintide	15
cerivastatin	15
colesevelam hydrochloride	15
pitavastatin	15
ezetimibe	15
rosuvastatin calcium	15
liraglutide	15
lixisenatide	15
sitagliptin phosphate	15
saxagliptin	15
alogliptin	15
linagliptin	15
dulaglutide	15
canagliflozin	15
empagliflozin	15
alirocumab	15
evolocumab	15
semaglutide	15
spironolactone	16
hydrochlorothiazide	16
hydralazine	16
atenolol	16
chlorthalidone	16
bendroflumethiazide	16
indapamide	16
captopril	16
benazepril	16
amlodipine	16
lisinopril	16
perindopril	16
enalapril	16
losartan	16
bisoprolol	16
felodipine	16
icatibant	16
enalaprilat	16
ramipril	16
fosinopril	16
spirapril	16
quinapril	16
eprosartan	16
carvedilol	16
trandolapril	16
nebivolol	16
candesartan	16
valsartan	16
irbesartan	16
telmisartan	16
eplerenone	16
olmesartan	16
aliskiren	16
testosterone	17
estradiol	17
menotropins	17
mestranol	17
megestrol	17
progesterone	17
methyltestosterone	17
diethylstilbestrol	17
clomiphene	17
estrone	17
ethinyl estradiol	17
norgestrel	17
norethindrone	17
aminoglutethimide	17
bromocriptine	17
nandrolone	17
quinestrol	17
dydrogesterone	17
danazol	17
medroxyprogesterone	17
norethynodrel	17
fluoxymesterone	17
flutamide	17
levonorgestrel	17
desogestrel	17
goserelin	17
mifepristone	17
triptorelin pamoate	17
leuprolide	17
nafarelin	17
dienogest	17
etonogestrel	17
cetrorelix	17
norgestimate	17
raloxifene hydrochloride	17
ganirelix	17
letrozole	17
drospirenone	17
penicillin v	18
trimethoprim	18
ampicillin	18
amoxicillin	18
carbenicillin	18
methicillin	18
ticarcillin	18
tobramycin	18
cloxacillin	18
oxacillin	18
cephradine	18
cephalexin	18
cephalothin	18
nafcillin	18
cefazolin	18
sulfamethoxazole	18
vancomycin	18
clindamycin	18
dicloxacillin	18
amikacin	18
fosfomycin	18
amdinocillin	18
cefoxitin	18
cefamandole	18
cefuroxime	18
cefaclor	18
colistin	18
netilmicin	18
piperacillin	18
azlocillin	18
mezlocillin	18
cefotiam	18
cefoperazone	18
cefotaxime	18
ceftazidime	18
ciprofloxacin	18
ceftizoxime	18
aztreonam	18
imipenem	18
cilastatin	18
norfloxacin	18
meropenem	18
ofloxacin	18
sulbactam	18
ceftriaxone	18
cefixime	18
cefotetan	18
cefmetazole	18
tazobactam	18
daptomycin	18
cefmenoxime	18
cefepime	18
moxalactam	18
levofloxacin	18
linezolid	18
moxifloxacin	18
tigecycline	18
ertapenem	18
morphine	19
dopamine	19
chlordiazepoxide	19
amphetamine	19
apomorphine	19
chlorpromazine	19
nicotine	19
norepinephrine	19
dextroamphetamine	19
acetylcholine	19
atropine	19
reserpine	19
scopolamine	19
cocaine	19
imipramine	19
diazepam	19
methysergide	19
dronabinol	19
pentobarbital	19
cyproheptadine	19
mazindol	19
levodopa	19
clonidine	19
haloperidol	19
desipramine	19
naloxone	19
pargyline	19
carbachol	19
pilocarpine	19
pimozide	19
methamphetamine	19
mecamylamine	19
tranylcypromine	19
fenfluramine	19
baclofen	19
methylphenidate	19
tetrabenazine	19
naltrexone	19
selegiline	19
flumazenil	19
levobunolol	20
echothiophate iodide	20
cyclopentolate	20
timolol	20
metipranolol	20
betaxolol	20
carteolol	20
tropicamide	20
propoxycaine	20
fluorometholone	20
brimonidine tartrate	20
dipivefrin	20
apraclonidine	20
dapiprazole	20
perflutren	20
latanoprost	20
benoxinate	20
loteprednol etabonate	20
dorzolamide	20
bromfenac	20
rimexolone	20
difluprednate	20
brinzolamide	20
nepafenac	20
bimatoprost	20
travoprost	20
tafluprost	20
lorazepam	21
amitriptyline	21
doxepin	21
clozapine	21
nortriptyline	21
phenelzine	21
maprotiline	21
clomipramine	21
trazodone	21
trimipramine	21
amoxapine	21
fluoxetine	21
amisulpride	21
lithium carbonate	21
citalopram	21
sertraline	21
risperidone	21
fluvoxamine	21
paliperidone palmitate	21
paroxetine	21
alprazolam	21
buspirone	21
bupropion	21
nefazodone	21
milnacipran	21
modafinil	21
quetiapine fumarate	21
olanzapine	21
venlafaxine hydrochloride	21
atomoxetine hydrochloride	21
mirtazapine	21
duloxetine hydrochloride	21
ziprasidone	21
aripiprazole	21
malathion	22
diphenoxylate	22
droxidopa	22
oxymetazoline	22
naphazoline	22
methimazole	22
sulfapyridine	22
bethanidine	22
methyclothiazide	22
mafenide	22
tripelennamine	22
sulfacetamide	22
oxyphenonium	22
ritodrine	22
doxapram	22
benzphetamine	22
lypressin	22
levorphanol	22
piperazine	22
chlorphentermine	22
phentermine	22
antazoline	22
clioquinol	22
hydroflumethiazide	22
mitotane	22
ethchlorvynol	22
guaifenesin	22
deslanoside	22
methenamine	22
sulfamerazine	22
diethylpropion	22
dibucaine	22
etidocaine	22
sulfinpyrazone	22
thiabendazole	22
candicidin	22
hexachlorophene	22
protriptyline	22
tiopronin	22
ethoxzolamide	22
piperonyl butoxide	22
loperamide	22
aminosalicylic acid	22
dimercaprol	22
isoetharine	22
cephaloglycin	22
propiolactone	22
pyridostigmine bromide	22
dienestrol	22
estazolam	22
cosyntropin	22
betazole	22
methylergonovine	22
chlormerodrin	22
cyclacillin	22
sulfaphenazole	22
oxymetholone	22
methazolamide	22
meclizine	22
pheniramine	22
fludrocortisone	22
cyclizine	22
oxamniquine	22
iopanoic acid	22
aminocaproic acid	22
niclosamide	22
iodipamide	22
flavoxate	22
dantrolene	22
acetohexamide	22
iodamide	22
oxandrolone	22
levallorphan	22
troleandomycin	22
trifluridine	22
calcium gluconate	22
ethylestrenol	22
chlorotrianisene	22
potassium iodide	22
dimenhydrinate	22
chlormezanone	22
phensuximide	22
permethrin	22
plicamycin	22
iophendylate	22
stanozolol	22
dextrothyroxine	22
ipodate	22
isosorbide	22
trioxsalen	22
menthol	22
testolactone	22
chlorphenesin	22
nifurtimox	22
hydroxocobalamin	22
dichlorphenamide	22
succimer	22
propyliodone	22
pyrithione	22
trientine	22
carboprost	22
estetrol	22
carisoprodol	22
sulfameter	22
tyropanoate	22
chlorzoxazone	22
haloprogin	22
dicyclomine	22
tolazamide	22
ambenonium chloride	22
rimantadine	22
estropipate	22
trilostane	22
metolazone	22
lutetium	22
doxylamine	22
bentiromide	22
phenazopyridine	22
oxyphencyclimine	22
hetacillin	22
ceforanide	22
dezocine	22
bismuth subsalicylate	22
medrysone	22
zinc sulfate	22
methocarbamol	22
dyphylline	22
ivermectin	22
clidinium	22
tyloxapol	22
tizanidine	22
metocurine	22
pirbuterol	22
hydroxystilbamidine	22
methsuximide	22
pipobroman	22
miltefosine	22
ziconotide	22
moexipril	22
cyclothiazide	22
pralidoxime	22
amifampridine	22
dyclonine	22
perflubron	22
auranofin	22
magnesium carbonate	22
diphemanil methylsulfate	22
ferric ammonium citrate	22
deflazacort	22
sodium thiosulfate	22
chromic chloride	22
fluocinolone	22
poractant alfa	22
triclofos	22
ferumoxides	22
ferric citrate	22
fomepizole	22
nalmefene	22
sermorelin	22
mequinol	22
methylnaltrexone	22
gallium nitrate	22
nabilone	22
penciclovir	22
potassium perchlorate	22
defibrotide	22
triclabendazole	22
deferiprone	22
pemirolast	22
trimetrexate	22
imciromab pentetate	22
colfosceril palmitate	22
beractant	22
ferrous fumarate	22
lactitol	22
balsalazide	22
doxacurium	22
torsemide	22
pramoxine	22
lofexidine	22
tetrahydrozoline	22
nitisinone	22
dexchlorpheniramine	22
benzquinamide	22
carbinoxamine	22
ferric maltol	22
potassium sulfate	22
secnidazole	22
amlexanox	22
crotamiton	22
cevimeline	22
tolcapone	22
cetyl alcohol	22
miglustat	22
monobenzone	22
decamethonium	22
dolasetron	22
butoconazole	22
ingenol	22
iotrolan	22
bitolterol	22
methyl salicylate	22
pancrelipase	22
cyclobenzaprine	22
manganese sulfate	22
edaravone	22
dimethyl fumarate	22
benzyl benzoate	22
guanadrel	22
acetohydroxamic acid	22
oxybenzone	22
denileukin diftitox	22
perflexane	22
histrelin	22
homatropine	22
invert sugar	22
difenoxin	22
avobenzone	22
lithium citrate	22
docosanol	22
tafenoquine	22
magnesium trisilicate	22
trimethobenzamide	22
arbutamine	22
valrubicin	22
pseudoephedrine	22
halazepam	22
benzonatate	22
oxaprozin	22
dromostanolone	22
sodium lactate	22
ioxilan	22
menadiol	22
diphenidol	22
meclocycline	22
azatadine	22
pyrvinium	22
zinc acetate	22
pegademase bovine	22
anileridine	22
butalbital	22
chloroxine	22
meprednisone	22
phendimetrazine	22
fidaxomicin	22
lodoxamide tromethamine	22
tridihexethyl	22
emedastine	22
bromodiphenhydramine	22
polyestradiol	22
norelgestromin	22
ethynodiol	22
indecainide	22
diphenylpyraline	22
levoleucovorin	22
dexbrompheniramine	22
hexocyclium	22
sulfoxone	22
cycrimine	22
famciclovir	22
potassium citrate	22
hexafluorenium	22
demecarium	22
methdilazine	22
methixene	22
pegloticase	22
ethinamate	22
phenacemide	22
quinethazone	22
nitazoxanide	22
buclizine	22
anisindione	22
paramethadione	22
lapyrium	22
hexylcaine	22
acetophenazine	22
zanamivir	22
migalastat	22
pirfenidone	22
ferumoxsil	22
iloperidone	22
ulipristal	22
rapacuronium	22
aldesleukin	22
safinamide	22
ardeparin	22
alosetron	22
metharbital	22
octocrylene	22
iocetamic acid	22
paricalcitol	22
metaxalone	22
flibanserin	22
fomivirsen	22
methantheline	22
rescinnamine	22
sodium citrate	22
capromab pendetide	22
bentoquatam	22
alitretinoin	22
potassium acetate	22
isopropamide iodide	22
conivaptan	22
icodextrin	22
propiomazine	22
naratriptan	22
alatrofloxacin	22
bepotastine	22
istradefylline	22
gadoversetamide	22
sodium benzoate	22
calfactant	22
fluciclovine f-18	22
clevidipine	22
ospemifene	22
calcium acetate	22
ethotoin	22
propoxyphene napsylate	22
spinosad	22
peramivir	22
methyprylon	22
deferasirox	22
alvimopan	22
metreleptin	22
treprostinil	22
abarelix	22
peginterferon beta-1a	22
regadenoson	22
bazedoxifene	22
estrogens, conjugated synthetic a	22
pasireotide	22
dexmethylphenidate hydrochloride	22
dexlansoprazole	22
obeticholic acid	22
ambrisentan	22
macimorelin	22
fospropofol	22
tasimelteon	22
bremelanotide	22
deserpidine	22
protokylol	22
piperacetazine	22
talbutal	22
levopropoxyphene	22
tesamorelin	22
voclosporin	22
teduglutide	22
obiltoxaximab	22
lucinactant	22
lubiprostone	22
siltuximab	22
lorcaserin	22
urofollitropin	22
netupitant	22
pimavanserin	22
galsulfase	22
ecallantide	22
tavaborole	22
mipomersen	22
reslizumab	22
ioflupane	22
idursulfase	22
azilsartan	22
eliglustat	22
fosaprepitant	22
fostamatinib	22
selexipag	22
remimazolam	22
linaclotide	22
teriflunomide	22
carglumic acid	22
rilonacept	22
triheptanoin	22
ocrelizumab	22
macitentan	22
elagolix	22
crofelemer	22
afamelanotide	22
betrixaban	22
riociguat	22
levamlodipine	22
raxibacumab	22
flutemetamol	22
ivacaftor	22
lumacaftor	22
eteplirsen	22
tafamidis	22
florbetapir	22
niraparib	22
olodaterol	22
finafloxacin	22
opicapone	22
lifitegrast	22
ponesimod	22
suvorexant	22
avanafil	22
estrogens, conjugated synthetic b	22
patiromer	22
taliglucerase alfa	22
alcaftadine	22
peginesatide	22
relugolix	22
eslicarbazepine	22
levomefolate calcium	22
dornase alfa	22
interferon alfa-n3	22
benralizumab	22
apalutamide	22
asfotase alfa	22
interferon gamma-1b	22
eluxadoline	22
plecanatide	22
dexrazoxane	22
telotristat	22
omadacycline	22
ozenoxacin	22
vericiguat	22
naloxegol	22
sarilumab	22
levalbuterol	22
doravirine	22
olaratumab	22
lesinurad	22
tipiracil	22
tenapanor	22
velpatasvir	22
guselkumab	22
sucroferric oxyhydroxide	22
nusinersen	22
bezlotoxumab	22
brexpiprazole	22
baricitinib	22
darolutamide	22
encorafenib	22
abaloparatide	22
valbenazine	22
sebelipase alfa	22
entrectinib	22
gilteritinib	22
patisiran	22
capmatinib	22
ozanimod	22
emicizumab	22
acalabrutinib	22
lusutrombopag	22
mecasermin	22
thonzonium bromide	22
voxilaprevir	22
ubrogepant	22
deutetrabenazine	22
bictegravir	22
pibrentasvir	22
brexanolone	22
naldemedine	22
cerliponase alfa	22
vaborbactam	22
voxelotor	22
ivosidenib	22
baloxavir	22
methoxyflurane	23
enflurane	23
isoflurane	23
halothane	23
lidocaine	23
gallamine triethiodide	23
glycopyrrolate	23
ketamine	23
droperidol	23
tubocurarine	23
pancuronium	23
neostigmine	23
meperidine	23
thiopental	23
pentazocine	23
succinylcholine	23
fentanyl	23
edrophonium	23
bupivacaine	23
mepivacaine	23
methohexital	23
etomidate	23
thiamylal	23
butorphanol	23
sufentanil	23
nalbuphine	23
midazolam	23
propofol	23
atracurium	23
sevoflurane	23
ropivacaine	23
alfentanil	23
desflurane	23
mivacurium	23
pipecuronium	23
rocuronium	23
vecuronium bromide	23
remifentanil	23
cisatracurium	23
dexmedetomidine	23
sugammadex	23
levobupivacaine	23
tranexamic acid	24
warfarin	24
aspirin	24
vitamin k	24
phenprocoumon	24
phenindione	24
ticlopidine	24
danaparoid	24
cilostazol	24
bivalirudin	24
reteplase	24
desirudin	24
clopidogrel	24
argatroban	24
tirofiban	24
enoxaparin	24
dalteparin	24
eptifibatide	24
abciximab	24
tinzaparin	24
cangrelor	24
tenecteplase	24
prasugrel hydrochloride	24
fondaparinux	24
dabigatran	24
rivaroxaban	24
ticagrelor	24
apixaban	24
vorapaxar	24
edoxaban	24
idarucizumab	24
glutathione	25
tyrosine	25
urea	25
cortisone	25
pentagastrin	25
methylene blue	25
arginine	25
sodium chloride	25
potassium chloride	25
calcium	25
deoxycholic acid	25
cellulose	25
caffeine	25
glucagon	25
histamine	25
glycine	25
dactinomycin	25
hydrocortisone	25
cysteine	25
insulin	25
oxytocin	25
glycerol	25
acetazolamide	25
ascorbic acid	25
folic acid	25
uridine	25
xylose	25
calcium carbonate	25
pyridoxine	25
dexamethasone	25
dimethyl sulfoxide	25
mannitol	25
isoflurophate	25
clofibrate	25
lipase	25
ammonium chloride	25
secretin	25
choline	25
adenosine	25
calcium chloride	25
tromethamine	25
heparin	25
penicillamine	25
fibrinolysin	25
riboflavin	25
parathyroid hormone	25
iodine	25
indomethacin	25
vitamin a	25
quinine	25
cysteamine	25
metyrapone	25
colchicine	25
biotin	25
sorbitol	25
lanthanum	25
thiamine	25
aluminum	25
probenecid	25
silver	25
tetracaine	25
thyrotropin	25
idoxuridine	25
magnesium oxide	25
ethacrynic acid	25
mersalyl	25
uracil	25
aprotinin	25
tolbutamide	25
amiloride	25
ceruletide	25
inulin	25
allopurinol	25
polytetrafluoroethylene	25
tretinoin	25
streptozocin	25
bumetanide	25
propylthiouracil	25
deferoxamine	25
betaine	25
pantothenic acid	25
acetylcysteine	25
vitamin e	25
sodium fluoride	25
pyrethrins	25
magnesium hydroxide	25
trypan blue	25
evans blue	25
cholecalciferol	25
zinc oxide	25
sodium nitrite	25
capsaicin	25
methoxsalen	25
beta carotene	25
sodium bicarbonate	25
dinoprostone	25
alprostadil	25
dicumarol	25
gramicidin	25
selenomethionine	25
safflower oil	25
magnesium chloride	25
manganese chloride	25
dinoprost	25
citric acid	25
triclosan	25
lactic acid	25
guanidine	25
calcitriol	25
benzyl alcohol	25
selenious acid	25
sincalide	25
sodium acetate	25
zinc chloride	25
niacin	25
ferrous sulfate	25
sodium phosphate	25
cholic acid	25
sapropterin	25
masoprocol	25
eflornithine	25
rifabutin	25
fluorescein	25
soybean oil	25
hydroquinone	25
olive oil	25
sodium carbonate	25
tartaric acid	25
phosphoric acid	25
becaplermin	25
ethanolamine	25
sodium sulfate	25
titanium dioxide	25
cupric chloride	25
bethanechol	25
alpha-tocopherol	25
polyethylene	25

## Sheet: K-means Experiment 2 Results
Drugs	Cluster Number				Cluster Number	Number of Drugs in the cluster
chloroquine	1				1	143
glutathione	1				2	27
tyrosine	1				3	90
urea	1				4	56
cortisone	1				5	86
methylene blue	1				6	79
arginine	1				7	52
sodium chloride	1				8	31
potassium chloride	1				9	37
calcium	1				10	28
deoxycholic acid	1				11	45
cellulose	1				12	31
caffeine	1				13	17
glucagon	1				14	39
glycine	1				15	23
dactinomycin	1				16	36
hydrocortisone	1				17	41
cysteine	1				18	57
insulin	1				19	70
oxytocin	1				20	26
glycerol	1				21	40
acetazolamide	1				22	545
ascorbic acid	1				23	38
folic acid	1				24	32		39.5
uridine	1				total drugs	1669
xylose	1
calcium carbonate	1
pyridoxine	1
dexamethasone	1
dimethyl sulfoxide	1
mannitol	1
isoflurophate	1
clofibrate	1
lipase	1
ammonium chloride	1
secretin	1
choline	1
calcium chloride	1
tromethamine	1
heparin	1
penicillamine	1
fibrinolysin	1
riboflavin	1
parathyroid hormone	1
iodine	1
vitamin a	1
quinine	1
cysteamine	1
colchicine	1
biotin	1
sorbitol	1
lanthanum	1
thiamine	1
aluminum	1
calcitonin	1
probenecid	1
silver	1
thyrotropin	1
idoxuridine	1
magnesium oxide	1
ethacrynic acid	1
lactulose	1
uracil	1
aprotinin	1
chlorhexidine	1
tolbutamide	1
amiloride	1
ceruletide	1
inulin	1
allopurinol	1
polytetrafluoroethylene	1
tretinoin	1
streptozocin	1
bumetanide	1
deferoxamine	1
betaine	1
pantothenic acid	1
acetylcysteine	1
vitamin e	1
sodium fluoride	1
trypan blue	1
pentoxifylline	1
cholecalciferol	1
zinc oxide	1
sodium nitrite	1
colestipol	1
beta carotene	1
sodium bicarbonate	1
dinoprostone	1
dicumarol	1
gramicidin	1
selenomethionine	1
dextrothyroxine	1
safflower oil	1
probucol	1
magnesium chloride	1
dinoprost	1
citric acid	1
fenofibrate	1
triclosan	1
lactic acid	1
guanidine	1
calcitriol	1
calcifediol	1
sincalide	1
sodium acetate	1
zinc chloride	1
niacin	1
gemfibrozil	1
ferrous sulfate	1
tyloxapol	1
sodium phosphate	1
cholic acid	1
sapropterin	1
rifabutin	1
fluorescein	1
lovastatin	1
soybean oil	1
hydroquinone	1
olive oil	1
simvastatin	1
pravastatin	1
sodium carbonate	1
tartaric acid	1
orlistat	1
phosphoric acid	1
becaplermin	1
ethanolamine	1
sodium sulfate	1
titanium dioxide	1
cupric chloride	1
alpha-tocopherol	1
fluvastatin	1
troglitazone	1
fenofibric acid	1
atorvastatin	1
rosiglitazone	1
cerivastatin	1
alitretinoin	1
pitavastatin	1
ezetimibe	1
polyethylene	1
rosuvastatin calcium	1
betamethasone	2
triamcinolone	2
paramethasone	2
benzoyl peroxide	2
fluprednisolone	2
fluocinonide	2
flumethasone	2
clobetasol	2
desoximetasone	2
etretinate	2
desonide	2
halcinonide	2
isotretinoin	2
fluocinolone	2
calcipotriene	2
acitretin	2
prednicarbate	2
azelaic acid	2
adapalene	2
dexpanthenol	2
alclometasone dipropionate	2
halobetasol	2
amcinonide	2
diflorasone	2
clocortolone pivalate	2
tazarotene	2
pimecrolimus	2
metaraminol	3
epinephrine	3
procaine	3
digitoxin	3
propranolol	3
isoproterenol	3
phenoxybenzamine	3
dihydroergotamine	3
theophylline	3
norepinephrine	3
histamine	3
acetylcholine	3
atropine	3
quinidine	3
procainamide	3
phentolamine	3
aminophylline	3
magnesium sulfate	3
metaproterenol	3
minoxidil	3
phenylephrine	3
methyldopa	3
adenosine	3
guanethidine	3
oxprenolol	3
acebutolol	3
sotalol	3
pindolol	3
carbachol	3
verapamil	3
bethanidine	3
ergotamine	3
diazoxide	3
trimethaphan	3
dipyridamole	3
amiodarone	3
chlorothiazide	3
ephedrine	3
furosemide	3
lypressin	3
trichlormethiazide	3
nitroglycerin	3
nifedipine	3
digoxin	3
mephentermine	3
hydroflumethiazide	3
labetalol	3
disopyramide	3
ergoloid mesylates	3
methoxamine	3
desoxycorticosterone	3
guanabenz	3
pentolinium tartrate	3
tolazoline	3
mexiletine	3
dobutamine	3
triamterene	3
glyburide	3
prazosin	3
diltiazem	3
epoprostenol	3
capsaicin	3
penbutolol	3
nadolol	3
guanfacine	3
alprostadil	3
polythiazide	3
tocainide	3
propafenone	3
flecainide	3
metolazone	3
nicardipine	3
iloprost	3
bepridil	3
dofetilide	3
nimodipine	3
esmolol	3
milrinone	3
isradipine	3
moricizine	3
bretylium	3
pinacidil	3
ibutilide	3
fenoldopam	3
ranolazine	3
ivabradine	3
bosentan	3
dronedarone	3
sildenafil citrate	3
clevidipine	3
cyclophosphamide	4
ifosfamide	4
methotrexate	4
asparaginase	4
hydroxyurea	4
lomustine	4
mercaptopurine	4
vinblastine	4
doxorubicin	4
fluorouracil	4
chlorambucil	4
mechlorethamine	4
thiotepa	4
daunorubicin	4
cytarabine	4
procarbazine	4
vidarabine	4
melphalan	4
busulfan	4
thioguanine	4
floxuridine	4
vincristine	4
leucovorin	4
carmustine	4
dacarbazine	4
mesna	4
thalidomide	4
tamoxifen	4
cisplatin	4
bleomycin	4
azacitidine	4
etoposide	4
teniposide	4
amifostine	4
mitomycin	4
idarubicin	4
cladribine	4
paclitaxel	4
epirubicin	4
decitabine	4
carboplatin	4
mitoxantrone	4
filgrastim	4
vinorelbine	4
irinotecan	4
gemcitabine	4
topotecan	4
arsenic trioxide	4
fludarabine	4
docetaxel	4
temozolomide	4
oxaliplatin	4
imatinib mesylate	4
capecitabine	4
bortezomib	4
lenalidomide	4
nitrofurazone	5
chloramphenicol	5
penicillin g benzathine	5
rifampin	5
streptomycin	5
nalidixic acid	5
nitrofurantoin	5
cycloserine	5
tetracycline	5
spectinomycin	5
doxycycline	5
isoniazid	5
paromomycin	5
oxytetracycline	5
chlortetracycline	5
novobiocin	5
lincomycin	5
sulfadiazine	5
erythromycin	5
neomycin	5
cephapirin	5
tinidazole	5
metronidazole	5
pyrazinamide	5
gentian violet	5
penicillin g procaine	5
cephaloglycin	5
bacitracin	5
ethambutol	5
methacycline	5
sulfisoxazole	5
silver sulfadiazine	5
ethionamide	5
demeclocycline	5
amdinocillin	5
minocycline	5
povidone-iodine	5
sulfamethizole	5
cinoxacin	5
capreomycin	5
viomycin	5
clofazimine	5
furazolidone	5
bacampicillin	5
ceforanide	5
enoxacin	5
azithromycin	5
norfloxacin	5
cefpodoxime	5
ceftibuten	5
cefprozil	5
cefdinir	5
clarithromycin	5
mupirocin	5
rifapentine	5
lomefloxacin	5
sparfloxacin	5
dirithromycin	5
grepafloxacin	5
sulfanilamide	5
rifaximin	5
gatifloxacin	5
loracarbef	5
cefpiramide	5
cefonicid	5
cefditoren	5
fidaxomicin	5
trovafloxacin	5
doripenem	5
oritavancin	5
gemifloxacin	5
telithromycin	5
quinupristin	5
dalfopristin	5
dalbavancin	5
delafloxacin	5
telavancin	5
bedaquiline	5
retapamulin	5
ceftolozane	5
ceftaroline fosamil	5
besifloxacin	5
avibactam	5
finafloxacin	5
omadacycline	5
cefiderocol	5
altretamine	6
niacinamide	6
estramustine	6
midostaurin	6
sirolimus	6
clofarabine	6
bicalutamide	6
exemestane	6
bendamustine hydrochloride	6
pemetrexed	6
fulvestrant	6
romidepsin	6
vorinostat	6
abiraterone	6
zoledronic acid	6
trabectedin	6
cetuximab	6
everolimus	6
trastuzumab	6
lonafarnib	6
erlotinib hydrochloride	6
temsirolimus	6
gemtuzumab	6
pegfilgrastim	6
gefitinib	6
eribulin	6
ibritumomab tiuxetan	6
panitumumab	6
ixabepilone	6
bevacizumab	6
lapatinib	6
pomalidomide	6
sorafenib	6
sunitinib	6
bosutinib	6
brentuximab vedotin	6
inotuzumab ozogamicin	6
belinostat	6
pertuzumab	6
dasatinib	6
panobinostat	6
palbociclib	6
axitinib	6
ado-trastuzumab emtansine	6
ipilimumab	6
blinatumomab	6
pazopanib	6
crizotinib	6
afatinib	6
carfilzomib	6
lenvatinib	6
ofatumumab	6
necitumumab	6
nintedanib	6
rucaparib	6
olaparib	6
aflibercept	6
obinutuzumab	6
ramucirumab	6
cabozantinib	6
elotuzumab	6
ponatinib	6
vemurafenib	6
ixazomib	6
idelalisib	6
nivolumab	6
cabazitaxel	6
tivozanib	6
daratumumab	6
regorafenib	6
trametinib	6
dabrafenib	6
venetoclax	6
pembrolizumab	6
ceritinib	6
atezolizumab	6
durvalumab	6
avelumab	6
osimertinib	6
sulfasalazine	7
azathioprine	7
prednisone	7
prednisolone	7
methylprednisolone	7
dapsone	7
levamisole	7
ribavirin	7
mycophenolic acid	7
hydroxychloroquine	7
foscarnet	7
pentostatin	7
cyclosporine	7
tacrolimus	7
abatacept	7
acyclovir	7
ganciclovir	7
interferon beta-1b	7
interferon beta-1a	7
mesalamine	7
alemtuzumab	7
imiquimod	7
dimethyl fumarate	7
denileukin diftitox	7
leflunomide	7
glatiramer acetate	7
valacyclovir	7
infliximab	7
daclizumab	7
etanercept	7
rituximab	7
fingolimod hydrochloride	7
basiliximab	7
valganciclovir	7
adalimumab	7
natalizumab	7
certolizumab pegol	7
tocilizumab	7
tofacitinib	7
eculizumab	7
ustekinumab	7
apremilast	7
belimumab	7
teriflunomide	7
golimumab	7
ocrelizumab	7
vedolizumab	7
canakinumab	7
ixekizumab	7
secukinumab	7
brodalumab	7
guselkumab	7
morphine	8
methadone	8
naloxone	8
meperidine	8
levorphanol	8
codeine	8
pentazocine	8
bupivacaine	8
naltrexone	8
mepivacaine	8
dextromethorphan	8
loperamide	8
oxymorphone	8
oxycodone	8
hydrocodone	8
levallorphan	8
buprenorphine	8
butorphanol	8
dihydrocodeine	8
hydromorphone	8
nalbuphine	8
dezocine	8
tramadol	8
ondansetron	8
ropivacaine	8
ketorolac	8
nalmefene	8
methylnaltrexone	8
alvimopan	8
levobupivacaine	8
tapentadol	8
zidovudine	9
zalcitabine	9
didanosine	9
nevirapine	9
lamivudine	9
stavudine	9
adefovir	9
saquinavir	9
ritonavir	9
tenofovir	9
delavirdine	9
indinavir	9
amprenavir	9
enfuvirtide	9
nelfinavir	9
efavirenz	9
peginterferon alfa-2a	9
tipranavir	9
abacavir	9
lopinavir	9
emtricitabine	9
atazanavir sulfate	9
entecavir	9
peginterferon alfa-2b	9
fosamprenavir	9
etravirine	9
darunavir	9
telaprevir	9
telbivudine	9
maraviroc	9
rilpivirine	9
raltegravir potassium	9
simeprevir	9
dolutegravir	9
cobicistat	9
sofosbuvir	9
ledipasvir	9
amphotericin b	10
nystatin	10
miconazole	10
clotrimazole	10
flucytosine	10
econazole	10
natamycin	10
ketoconazole	10
fluconazole	10
terbinafine	10
ciclopirox	10
tioconazole	10
naftifine	10
itraconazole	10
sertaconazole	10
sulconazole	10
butoconazole	10
terconazole	10
butenafine	10
oxiconazole	10
posaconazole	10
voriconazole	10
anidulafungin	10
caspofungin	10
luliconazole	10
micafungin	10
efinaconazole	10
tavaborole	10
ipratropium	11
albuterol	11
pyrilamine	11
chlorpheniramine	11
cromolyn sodium	11
naphazoline	11
tripelennamine	11
beclomethasone	11
clemastine	11
triprolidine	11
terbutaline	11
brompheniramine	11
pheniramine	11
ketotifen	11
methacholine chloride	11
budesonide	11
nedocromil	11
cetirizine	11
loratadine	11
azelastine	11
flunisolide	11
zileuton	11
zafirlukast	11
levocabastine	11
salmeterol xinafoate	11
formoterol fumarate	11
epinastine	11
olopatadine hydrochloride	11
acrivastine	11
dexchlorpheniramine	11
fluticasone	11
mometasone furoate	11
pseudoephedrine	11
azatadine	11
emedastine	11
desloratadine	11
montelukast	11
fexofenadine	11
tiotropium bromide	11
ciclesonide	11
roflumilast	11
omalizumab	11
levocetirizine	11
indacaterol	11
vilanterol	11
isocarboxazid	12
glutethimide	12
trifluoperazine	12
prochlorperazine	12
diphenhydramine	12
promethazine	12
meprobamate	12
thiothixene	12
thioridazine	12
fluphenazine	12
metoclopramide	12
perphenazine	12
mesoridazine	12
promazine	12
chlorprothixene	12
procyclidine	12
phenmetrazine	12
triflupromazine	12
secobarbital	12
orphenadrine	12
trihexyphenidyl	12
hydroxyzine	12
benztropine	12
loxapine	12
cyclizine	12
molindone	12
biperiden	12
dimenhydrinate	12
trimeprazine	12
thiethylperazine	12
carisoprodol	12
phenylpropanolamine	13
flavoxate	13
terazosin	13
doxazosin	13
finasteride	13
trospium chloride	13
oxybutynin	13
tamsulosin	13
alfuzosin	13
silodosin	13
tolterodine tartrate	13
darifenacin	13
dutasteride	13
tadalafil	13
solifenacin succinate	13
mirabegron	13
fesoterodine	13
pentagastrin	14
ibuprofen	14
phenylbutazone	14
indomethacin	14
acetaminophen	14
flurbiprofen	14
tolmetin	14
oxyphenbutazone	14
mefenamic acid	14
ketoprofen	14
naproxen	14
magnesium hydroxide	14
cimetidine	14
sulindac	14
diclofenac	14
sucralfate	14
ranitidine	14
fenoprofen	14
diflunisal	14
bismuth subsalicylate	14
suprofen	14
piroxicam	14
omeprazole	14
cisapride	14
famotidine	14
misoprostol	14
etodolac	14
nizatidine	14
lansoprazole	14
rabeprazole	14
pantoprazole	14
nabumetone	14
carprofen	14
oxaprozin	14
meloxicam	14
celecoxib	14
rofecoxib	14
valdecoxib	14
esomeprazole	14
chlorpropamide	15
glipizide	15
metformin	15
tolazamide	15
exenatide	15
acarbose	15
pioglitazone	15
miglitol	15
glimepiride	15
repaglinide	15
nateglinide	15
pramlintide	15
colesevelam hydrochloride	15
liraglutide	15
lixisenatide	15
sitagliptin phosphate	15
saxagliptin	15
alogliptin	15
linagliptin	15
dulaglutide	15
canagliflozin	15
empagliflozin	15
semaglutide	15
spironolactone	16
hydrochlorothiazide	16
hydralazine	16
atenolol	16
saralasin	16
chlorthalidone	16
metoprolol	16
bendroflumethiazide	16
indapamide	16
captopril	16
benazepril	16
amlodipine	16
lisinopril	16
perindopril	16
enalapril	16
losartan	16
nisoldipine	16
bisoprolol	16
felodipine	16
icatibant	16
enalaprilat	16
ramipril	16
fosinopril	16
spirapril	16
quinapril	16
eprosartan	16
carvedilol	16
trandolapril	16
nebivolol	16
candesartan	16
valsartan	16
irbesartan	16
telmisartan	16
eplerenone	16
olmesartan	16
aliskiren	16
testosterone	17
estradiol	17
menotropins	17
mestranol	17
megestrol	17
progesterone	17
methyltestosterone	17
diethylstilbestrol	17
clomiphene	17
estrone	17
ethinyl estradiol	17
norgestrel	17
norethindrone	17
aminoglutethimide	17
bromocriptine	17
nandrolone	17
quinestrol	17
dydrogesterone	17
danazol	17
medroxyprogesterone	17
norethynodrel	17
fluoxymesterone	17
flutamide	17
testolactone	17
levonorgestrel	17
desogestrel	17
goserelin	17
mifepristone	17
triptorelin pamoate	17
leuprolide	17
nafarelin	17
dienogest	17
etonogestrel	17
cetrorelix	17
norgestimate	17
raloxifene hydrochloride	17
toremifene	17
ganirelix	17
letrozole	17
drospirenone	17
anastrozole	17
penicillin v	18
trimethoprim	18
ampicillin	18
amoxicillin	18
kanamycin	18
carbenicillin	18
methicillin	18
ticarcillin	18
tobramycin	18
cloxacillin	18
oxacillin	18
cephradine	18
cephalexin	18
cephalothin	18
nafcillin	18
cefazolin	18
sulfamethoxazole	18
vancomycin	18
clindamycin	18
dicloxacillin	18
amikacin	18
fosfomycin	18
cefoxitin	18
cefamandole	18
cefuroxime	18
cefaclor	18
colistin	18
netilmicin	18
piperacillin	18
azlocillin	18
mezlocillin	18
cefotiam	18
cefoperazone	18
cefotaxime	18
ceftazidime	18
ciprofloxacin	18
ceftizoxime	18
aztreonam	18
imipenem	18
cilastatin	18
meropenem	18
ofloxacin	18
sulbactam	18
ceftriaxone	18
cefixime	18
cefotetan	18
cefmetazole	18
tazobactam	18
daptomycin	18
cefmenoxime	18
cefepime	18
moxalactam	18
levofloxacin	18
linezolid	18
moxifloxacin	18
tigecycline	18
ertapenem	18
dopamine	19
chlordiazepoxide	19
amphetamine	19
apomorphine	19
chlorpromazine	19
nicotine	19
dextroamphetamine	19
reserpine	19
scopolamine	19
cocaine	19
imipramine	19
diazepam	19
methysergide	19
dronabinol	19
cyproheptadine	19
mazindol	19
levodopa	19
clonidine	19
haloperidol	19
desipramine	19
amitriptyline	19
pargyline	19
doxepin	19
pimozide	19
amantadine	19
methamphetamine	19
carbidopa	19
mecamylamine	19
clozapine	19
tranylcypromine	19
nortriptyline	19
phenelzine	19
fenfluramine	19
maprotiline	19
clomipramine	19
methylphenidate	19
tetrabenazine	19
trazodone	19
trimipramine	19
amoxapine	19
selegiline	19
fluoxetine	19
amisulpride	19
lithium carbonate	19
memantine	19
citalopram	19
pergolide	19
sertraline	19
risperidone	19
fluvoxamine	19
paliperidone palmitate	19
paroxetine	19
alprazolam	19
buspirone	19
bupropion	19
nefazodone	19
milnacipran	19
modafinil	19
quetiapine fumarate	19
pramipexole	19
olanzapine	19
venlafaxine hydrochloride	19
donepezil	19
atomoxetine hydrochloride	19
ropinirole	19
mirtazapine	19
duloxetine hydrochloride	19
ziprasidone	19
aripiprazole	19
lurasidone hydrochloride	19
levobunolol	20
echothiophate iodide	20
cyclopentolate	20
timolol	20
metipranolol	20
betaxolol	20
carteolol	20
tropicamide	20
propoxycaine	20
fluorometholone	20
brimonidine tartrate	20
dipivefrin	20
apraclonidine	20
dapiprazole	20
latanoprost	20
benoxinate	20
loteprednol etabonate	20
dorzolamide	20
bromfenac	20
rimexolone	20
difluprednate	20
brinzolamide	20
nepafenac	20
bimatoprost	20
travoprost	20
tafluprost	20
oxazepam	21
lorazepam	21
phenytoin	21
primidone	21
carbamazepine	21
ethosuximide	21
valproic acid	21
trimethadione	21
cannabidiol	21
flurazepam	21
clonazepam	21
baclofen	21
clorazepate dipotassium	21
sodium oxybate	21
temazepam	21
estazolam	21
triazolam	21
vigabatrin	21
clobazam	21
stiripentol	21
methsuximide	21
rufinamide	21
flumazenil	21
zonisamide	21
zolpidem	21
tiagabine	21
gabapentin	21
lamotrigine	21
felbamate	21
quazepam	21
oxcarbazepine	21
levetiracetam	21
fosphenytoin	21
topiramate	21
ezogabine	21
zaleplon	21
pregabalin	21
lacosamide	21
brivaracetam	21
perampanel	21
malathion	22
mephenytoin	22
diphenoxylate	22
amodiaquine	22
disulfiram	22
propantheline	22
droxidopa	22
oxymetazoline	22
methimazole	22
sulfapyridine	22
pilocarpine	22
methyclothiazide	22
mafenide	22
barium sulfate	22
metyrapone	22
sulfacetamide	22
oxyphenonium	22
ritodrine	22
tetracaine	22
benzphetamine	22
mersalyl	22
piperazine	22
chlorphentermine	22
phentermine	22
antazoline	22
clioquinol	22
mitotane	22
ethchlorvynol	22
guaifenesin	22
deslanoside	22
diatrizoate	22
methenamine	22
sulfamerazine	22
diethylpropion	22
primaquine	22
dibucaine	22
etidocaine	22
sulfinpyrazone	22
propylthiouracil	22
indocyanine green	22
thiabendazole	22
candicidin	22
pentamidine	22
diethylcarbamazine	22
hexachlorophene	22
metrizoic acid	22
metrizamide	22
protriptyline	22
tiopronin	22
ethoxzolamide	22
pemoline	22
piperonyl butoxide	22
aminosalicylic acid	22
dimercaprol	22
isoetharine	22
proguanil	22
propiolactone	22
pyridostigmine bromide	22
dienestrol	22
pyrimethamine	22
pyrethrins	22
cosyntropin	22
betazole	22
methylergonovine	22
chlormerodrin	22
cyclacillin	22
sulfaphenazole	22
oxymetholone	22
methazolamide	22
meclizine	22
fludrocortisone	22
oxamniquine	22
iopanoic acid	22
aminocaproic acid	22
evans blue	22
niclosamide	22
iodipamide	22
dantrolene	22
mebendazole	22
acetohexamide	22
galantamine	22
iodamide	22
meglumine	22
oxandrolone	22
simethicone	22
prazepam	22
troleandomycin	22
trifluridine	22
calcium gluconate	22
ethylestrenol	22
viloxazine	22
chlorotrianisene	22
potassium iodide	22
methoxsalen	22
chlormezanone	22
praziquantel	22
phensuximide	22
permethrin	22
plicamycin	22
chymopapain	22
midodrine	22
iophendylate	22
stanozolol	22
ipodate	22
iothalamate meglumine	22
isosorbide	22
trioxsalen	22
menthol	22
chlorphenesin	22
nifurtimox	22
hydroxocobalamin	22
dichlorphenamide	22
succimer	22
ethiodized oil	22
sulfadoxine	22
propyliodone	22
pyrithione	22
prilocaine	22
manganese chloride	22
bisacodyl	22
tacrine	22
trientine	22
sodium tetradecyl sulfate	22
mefloquine	22
carboprost	22
estetrol	22
sulfameter	22
tyropanoate	22
chlorzoxazone	22
haloprogin	22
dicyclomine	22
ambenonium chloride	22
rimantadine	22
estropipate	22
teriparatide	22
trilostane	22
benzyl alcohol	22
selenious acid	22
lutetium	22
doxylamine	22
bentiromide	22
phenazopyridine	22
oxyphencyclimine	22
hetacillin	22
medrysone	22
zinc sulfate	22
methocarbamol	22
dyphylline	22
albendazole	22
iopamidol	22
ivermectin	22
clidinium	22
tizanidine	22
metocurine	22
pirbuterol	22
polidocanol	22
hydroxystilbamidine	22
pipobroman	22
masoprocol	22
miltefosine	22
octreotide	22
eflornithine	22
ziconotide	22
moexipril	22
cyclothiazide	22
iohexol	22
pralidoxime	22
nilutamide	22
amifampridine	22
cabergoline	22
dyclonine	22
artesunate	22
perflubron	22
iofetamine	22
auranofin	22
pamidronate	22
halofantrine	22
magnesium carbonate	22
diphemanil methylsulfate	22
ferric ammonium citrate	22
deflazacort	22
sodium thiosulfate	22
chromic chloride	22
ioversol	22
iopromide	22
artemether	22
entacapone	22
poractant alfa	22
sargramostim	22
triclofos	22
cidofovir	22
olsalazine	22
granisetron	22
ferumoxides	22
sumatriptan	22
ferric citrate	22
chloroprocaine	22
atovaquone	22
fomepizole	22
sermorelin	22
mequinol	22
gallium nitrate	22
nabilone	22
alendronate	22
penciclovir	22
potassium perchlorate	22
defibrotide	22
triclabendazole	22
deferiprone	22
pemirolast	22
trimetrexate	22
lanreotide	22
imciromab pentetate	22
colfosceril palmitate	22
beractant	22
ferrous fumarate	22
bethanechol	22
rotigotine	22
lactitol	22
balsalazide	22
acamprosate	22
riluzole	22
torsemide	22
sibutramine	22
pramoxine	22
lofexidine	22
tetrahydrozoline	22
gadoteridol	22
nitisinone	22
benzquinamide	22
carbinoxamine	22
ferric maltol	22
potassium sulfate	22
secnidazole	22
amlexanox	22
crotamiton	22
perflutren	22
cevimeline	22
tolcapone	22
cetyl alcohol	22
miglustat	22
gadodiamide	22
iodixanol	22
monobenzone	22
decamethonium	22
dolasetron	22
anagrelide	22
ingenol	22
iotrolan	22
bitolterol	22
methyl salicylate	22
pancrelipase	22
cyclobenzaprine	22
manganese sulfate	22
edaravone	22
benzyl benzoate	22
guanadrel	22
acetohydroxamic acid	22
oxybenzone	22
perflexane	22
histrelin	22
homatropine	22
invert sugar	22
difenoxin	22
avobenzone	22
lithium citrate	22
docosanol	22
tafenoquine	22
magnesium trisilicate	22
trimethobenzamide	22
arbutamine	22
pegaspargase	22
valrubicin	22
halazepam	22
benzonatate	22
dromostanolone	22
sodium lactate	22
ioxilan	22
menadiol	22
diphenidol	22
meclocycline	22
asenapine	22
pyrvinium	22
gadoterate meglumine	22
zinc acetate	22
rivastigmine	22
pegademase bovine	22
anileridine	22
butalbital	22
chloroxine	22
meprednisone	22
phendimetrazine	22
lodoxamide tromethamine	22
tridihexethyl	22
bromodiphenhydramine	22
polyestradiol	22
norelgestromin	22
ethynodiol	22
indecainide	22
diphenylpyraline	22
levoleucovorin	22
dexbrompheniramine	22
hexocyclium	22
sulfoxone	22
rasagiline	22
cycrimine	22
famciclovir	22
potassium citrate	22
hexafluorenium	22
demecarium	22
methdilazine	22
methixene	22
pegloticase	22
ethinamate	22
phenacemide	22
quinethazone	22
nitazoxanide	22
buclizine	22
anisindione	22
paramethadione	22
lapyrium	22
hexylcaine	22
acetophenazine	22
zanamivir	22
migalastat	22
pirfenidone	22
verteporfin	22
ferumoxsil	22
iloperidone	22
gadobutrol	22
bexarotene	22
ulipristal	22
desvenlafaxine succinate	22
aldesleukin	22
imiglucerase	22
febuxostat	22
safinamide	22
ardeparin	22
alosetron	22
rizatriptan	22
palonosetron	22
metharbital	22
zolmitriptan	22
octocrylene	22
iocetamic acid	22
paricalcitol	22
metaxalone	22
flibanserin	22
fomivirsen	22
epoetin alfa	22
methantheline	22
rescinnamine	22
sodium citrate	22
capromab pendetide	22
lumefantrine	22
bentoquatam	22
potassium acetate	22
isopropamide iodide	22
sevelamer	22
oseltamivir	22
conivaptan	22
nelarabine	22
tegaserod	22
icodextrin	22
vilazodone hydrochloride	22
propiomazine	22
naratriptan	22
alatrofloxacin	22
frovatriptan	22
bepotastine	22
gadofosveset trisodium	22
palivizumab	22
istradefylline	22
gadoversetamide	22
sodium benzoate	22
aprepitant	22
eletriptan	22
tolvaptan	22
calfactant	22
fluciclovine f-18	22
ospemifene	22
prucalopride	22
lanthanum carbonate	22
pegvisomant	22
calcium acetate	22
ethotoin	22
almotriptan	22
propoxyphene napsylate	22
spinosad	22
peramivir	22
methyprylon	22
deferasirox	22
metreleptin	22
darbepoetin alfa	22
treprostinil	22
abarelix	22
peginterferon beta-1a	22
regadenoson	22
mepolizumab	22
bazedoxifene	22
estrogens, conjugated synthetic a	22
cinacalcet	22
rasburicase	22
pasireotide	22
dexmethylphenidate hydrochloride	22
agalsidase beta	22
dexlansoprazole	22
obeticholic acid	22
ambrisentan	22
macimorelin	22
fospropofol	22
tasimelteon	22
bremelanotide	22
deserpidine	22
protokylol	22
piperacetazine	22
talbutal	22
levopropoxyphene	22
tesamorelin	22
voclosporin	22
romiplostim	22
denosumab	22
ramelteon	22
teduglutide	22
pegaptanib	22
obiltoxaximab	22
ranibizumab	22
lucinactant	22
lubiprostone	22
varenicline	22
incobotulinumtoxina	22
siltuximab	22
lorcaserin	22
urofollitropin	22
netupitant	22
pimavanserin	22
galsulfase	22
ecallantide	22
mipomersen	22
lisdexamfetamine dimesylate	22
reslizumab	22
ioflupane	22
eltrombopag	22
idursulfase	22
azilsartan	22
eliglustat	22
fosaprepitant	22
fostamatinib	22
selexipag	22
remimazolam	22
ferric carboxymaltose	22
linaclotide	22
eszopiclone	22
carglumic acid	22
cariprazine	22
rilonacept	22
triheptanoin	22
macitentan	22
elagolix	22
crofelemer	22
afamelanotide	22
aclidinium bromide	22
riociguat	22
levamlodipine	22
raxibacumab	22
flutemetamol	22
ivacaftor	22
lumacaftor	22
eteplirsen	22
tafamidis	22
florbetapir	22
niraparib	22
abobotulinumtoxina	22
olodaterol	22
opicapone	22
lifitegrast	22
ponesimod	22
suvorexant	22
avanafil	22
estrogens, conjugated synthetic b	22
vortioxetine	22
patiromer	22
taliglucerase alfa	22
alcaftadine	22
peginesatide	22
relugolix	22
eslicarbazepine	22
levomefolate calcium	22
dornase alfa	22
interferon alfa-n3	22
benralizumab	22
apalutamide	22
asfotase alfa	22
alirocumab	22
evolocumab	22
interferon gamma-1b	22
eluxadoline	22
plecanatide	22
dexrazoxane	22
telotristat	22
talazoparib	22
ribociclib	22
ozenoxacin	22
vericiguat	22
naloxegol	22
sarilumab	22
levalbuterol	22
doravirine	22
olaratumab	22
lesinurad	22
tipiracil	22
tenapanor	22
velpatasvir	22
sucroferric oxyhydroxide	22
nusinersen	22
bezlotoxumab	22
brexpiprazole	22
baricitinib	22
darolutamide	22
encorafenib	22
abaloparatide	22
valbenazine	22
sebelipase alfa	22
entrectinib	22
gilteritinib	22
patisiran	22
capmatinib	22
ozanimod	22
emicizumab	22
acalabrutinib	22
lusutrombopag	22
mecasermin	22
thonzonium bromide	22
voxilaprevir	22
ubrogepant	22
deutetrabenazine	22
bictegravir	22
pibrentasvir	22
brexanolone	22
naldemedine	22
cerliponase alfa	22
vaborbactam	22
voxelotor	22
ivosidenib	22
baloxavir	22
methoxyflurane	23
enflurane	23
isoflurane	23
halothane	23
lidocaine	23
gallamine triethiodide	23
pentobarbital	23
glycopyrrolate	23
ketamine	23
droperidol	23
tubocurarine	23
pancuronium	23
neostigmine	23
doxapram	23
thiopental	23
succinylcholine	23
fentanyl	23
edrophonium	23
methohexital	23
etomidate	23
thiamylal	23
sufentanil	23
midazolam	23
propofol	23
atracurium	23
sevoflurane	23
alfentanil	23
desflurane	23
mivacurium	23
pipecuronium	23
rocuronium	23
vecuronium bromide	23
doxacurium	23
remifentanil	23
rapacuronium	23
cisatracurium	23
dexmedetomidine	23
sugammadex	23
tranexamic acid	24
warfarin	24
aspirin	24
vitamin k	24
phenprocoumon	24
phenindione	24
ticlopidine	24
danaparoid	24
cilostazol	24
bivalirudin	24
reteplase	24
desirudin	24
clopidogrel	24
argatroban	24
tirofiban	24
enoxaparin	24
dalteparin	24
eptifibatide	24
abciximab	24
tinzaparin	24
cangrelor	24
tenecteplase	24
prasugrel hydrochloride	24
fondaparinux	24
dabigatran	24
rivaroxaban	24
ticagrelor	24
apixaban	24
vorapaxar	24
edoxaban	24
betrixaban	24
idarucizumab	24

## Sheet: K-means Experiment 3 Results
Drugs	Cluster Number					Cluster Number	Number of Drugs in the cluster
clofibrate	1					1	26
colestipol	1					2	27
dextrothyroxine	1					3	90
safflower oil	1					4	52
probucol	1					5	65
fenofibrate	1					6	56
niacin	1					7	30
gemfibrozil	1					8	52
tyloxapol	1					9	37
lovastatin	1					10	28
simvastatin	1					11	45
pravastatin	1					12	30
orlistat	1					13	17
fluvastatin	1					14	84
troglitazone	1					15	22
fenofibric acid	1					16	32
atorvastatin	1					17	41
rosiglitazone	1					18	60
cerivastatin	1					19	70
colesevelam hydrochloride	1					20	27
pitavastatin	1					21	40
ezetimibe	1					22	531
rosuvastatin calcium	1					23	38
mipomersen	1					24	34
alirocumab	1					25	135	40
evolocumab	1					total drugs	1669
betamethasone	2
triamcinolone	2
paramethasone	2
benzoyl peroxide	2
fluprednisolone	2
fluocinonide	2
flumethasone	2
clobetasol	2
desoximetasone	2
etretinate	2
desonide	2
halcinonide	2
isotretinoin	2
fluocinolone	2
calcipotriene	2
acitretin	2
prednicarbate	2
azelaic acid	2
adapalene	2
dexpanthenol	2
alclometasone dipropionate	2
halobetasol	2
amcinonide	2
diflorasone	2
clocortolone pivalate	2
tazarotene	2
pimecrolimus	2
metaraminol	3
epinephrine	3
digitoxin	3
propranolol	3
isoproterenol	3
phenoxybenzamine	3
dihydroergotamine	3
norepinephrine	3
acetylcholine	3
atropine	3
quinidine	3
procainamide	3
phentolamine	3
aminophylline	3
magnesium sulfate	3
metaproterenol	3
minoxidil	3
phenylephrine	3
methyldopa	3
guanethidine	3
oxprenolol	3
acebutolol	3
sotalol	3
pindolol	3
verapamil	3
bethanidine	3
methyclothiazide	3
ergotamine	3
diazoxide	3
trimethaphan	3
dipyridamole	3
amiodarone	3
chlorothiazide	3
ephedrine	3
furosemide	3
lypressin	3
trichlormethiazide	3
nitroglycerin	3
nifedipine	3
digoxin	3
mephentermine	3
hydroflumethiazide	3
labetalol	3
disopyramide	3
ergoloid mesylates	3
methoxamine	3
desoxycorticosterone	3
guanabenz	3
pentolinium tartrate	3
tolazoline	3
mexiletine	3
metoprolol	3
dobutamine	3
bendroflumethiazide	3
triamterene	3
glyburide	3
prazosin	3
diltiazem	3
epoprostenol	3
penbutolol	3
nadolol	3
guanfacine	3
polythiazide	3
tocainide	3
propafenone	3
flecainide	3
metolazone	3
nicardipine	3
iloprost	3
bepridil	3
dofetilide	3
nimodipine	3
esmolol	3
milrinone	3
isradipine	3
nisoldipine	3
moexipril	3
moricizine	3
spirapril	3
bretylium	3
pinacidil	3
ibutilide	3
fenoldopam	3
torsemide	3
ranolazine	3
ivabradine	3
bosentan	3
dronedarone	3
sildenafil citrate	3
clevidipine	3
cyclophosphamide	4
ifosfamide	4
methotrexate	4
asparaginase	4
altretamine	4
hydroxyurea	4
lomustine	4
mercaptopurine	4
vinblastine	4
doxorubicin	4
fluorouracil	4
chlorambucil	4
mechlorethamine	4
thiotepa	4
daunorubicin	4
cytarabine	4
procarbazine	4
vidarabine	4
melphalan	4
busulfan	4
thioguanine	4
floxuridine	4
vincristine	4
leucovorin	4
carmustine	4
dacarbazine	4
mesna	4
cisplatin	4
bleomycin	4
azacitidine	4
etoposide	4
teniposide	4
amifostine	4
mitomycin	4
idarubicin	4
paclitaxel	4
epirubicin	4
decitabine	4
carboplatin	4
mitoxantrone	4
filgrastim	4
vinorelbine	4
irinotecan	4
gemcitabine	4
topotecan	4
arsenic trioxide	4
fludarabine	4
docetaxel	4
temozolomide	4
oxaliplatin	4
imatinib mesylate	4
bortezomib	4
chloroquine	5
amodiaquine	5
sulfasalazine	5
azathioprine	5
prednisone	5
prednisolone	5
idoxuridine	5
methylprednisolone	5
dapsone	5
levamisole	5
primaquine	5
pentamidine	5
proguanil	5
pyrimethamine	5
ribavirin	5
mycophenolic acid	5
hydroxychloroquine	5
sulfadoxine	5
foscarnet	5
mefloquine	5
cyclosporine	5
tacrolimus	5
abatacept	5
acyclovir	5
ganciclovir	5
artesunate	5
interferon beta-1b	5
interferon beta-1a	5
halofantrine	5
mesalamine	5
artemether	5
cidofovir	5
atovaquone	5
imiquimod	5
dimethyl fumarate	5
leflunomide	5
famciclovir	5
glatiramer acetate	5
valacyclovir	5
infliximab	5
daclizumab	5
etanercept	5
rituximab	5
fingolimod hydrochloride	5
lumefantrine	5
basiliximab	5
valganciclovir	5
adalimumab	5
natalizumab	5
certolizumab pegol	5
tocilizumab	5
tofacitinib	5
eculizumab	5
ustekinumab	5
apremilast	5
belimumab	5
teriflunomide	5
golimumab	5
ocrelizumab	5
vedolizumab	5
canakinumab	5
ixekizumab	5
secukinumab	5
brodalumab	5
guselkumab	5
niacinamide	6
tamoxifen	6
estramustine	6
midostaurin	6
sirolimus	6
bicalutamide	6
exemestane	6
pemetrexed	6
fulvestrant	6
romidepsin	6
vorinostat	6
abiraterone	6
zoledronic acid	6
trabectedin	6
cetuximab	6
everolimus	6
capecitabine	6
trastuzumab	6
lonafarnib	6
erlotinib hydrochloride	6
temsirolimus	6
gefitinib	6
eribulin	6
panitumumab	6
ixabepilone	6
bevacizumab	6
lapatinib	6
sorafenib	6
sunitinib	6
bosutinib	6
belinostat	6
pertuzumab	6
dasatinib	6
panobinostat	6
palbociclib	6
axitinib	6
ado-trastuzumab emtansine	6
ipilimumab	6
pazopanib	6
crizotinib	6
afatinib	6
lenvatinib	6
nintedanib	6
olaparib	6
ramucirumab	6
cabozantinib	6
ponatinib	6
vemurafenib	6
nivolumab	6
cabazitaxel	6
regorafenib	6
trametinib	6
dabrafenib	6
pembrolizumab	6
ceritinib	6
osimertinib	6
thalidomide	7
pentostatin	7
cladribine	7
sargramostim	7
alemtuzumab	7
clofarabine	7
bendamustine hydrochloride	7
denileukin diftitox	7
pegaspargase	7
nelarabine	7
gemtuzumab	7
pegfilgrastim	7
ibritumomab tiuxetan	7
lenalidomide	7
pomalidomide	7
brentuximab vedotin	7
inotuzumab ozogamicin	7
blinatumomab	7
carfilzomib	7
ofatumumab	7
necitumumab	7
obinutuzumab	7
elotuzumab	7
ixazomib	7
idelalisib	7
daratumumab	7
venetoclax	7
atezolizumab	7
durvalumab	7
avelumab	7
morphine	8
methadone	8
ibuprofen	8
naloxone	8
phenylbutazone	8
acetaminophen	8
levorphanol	8
codeine	8
pentazocine	8
naltrexone	8
flurbiprofen	8
mepivacaine	8
tolmetin	8
dextromethorphan	8
oxyphenbutazone	8
loperamide	8
mefenamic acid	8
ketoprofen	8
naproxen	8
oxymorphone	8
oxycodone	8
hydrocodone	8
levallorphan	8
buprenorphine	8
butorphanol	8
diclofenac	8
dihydrocodeine	8
hydromorphone	8
fenoprofen	8
nalbuphine	8
diflunisal	8
prilocaine	8
carisoprodol	8
dezocine	8
tramadol	8
suprofen	8
piroxicam	8
ziconotide	8
ondansetron	8
ropivacaine	8
etodolac	8
ketorolac	8
sumatriptan	8
methylnaltrexone	8
nabumetone	8
carprofen	8
meloxicam	8
celecoxib	8
rofecoxib	8
valdecoxib	8
levobupivacaine	8
tapentadol	8
zidovudine	9
zalcitabine	9
didanosine	9
nevirapine	9
lamivudine	9
stavudine	9
adefovir	9
saquinavir	9
ritonavir	9
tenofovir	9
delavirdine	9
indinavir	9
amprenavir	9
enfuvirtide	9
nelfinavir	9
efavirenz	9
peginterferon alfa-2a	9
tipranavir	9
abacavir	9
lopinavir	9
emtricitabine	9
atazanavir sulfate	9
entecavir	9
peginterferon alfa-2b	9
fosamprenavir	9
etravirine	9
darunavir	9
telaprevir	9
telbivudine	9
maraviroc	9
rilpivirine	9
raltegravir potassium	9
simeprevir	9
dolutegravir	9
cobicistat	9
sofosbuvir	9
ledipasvir	9
amphotericin b	10
nystatin	10
miconazole	10
clotrimazole	10
flucytosine	10
econazole	10
natamycin	10
ketoconazole	10
fluconazole	10
terbinafine	10
ciclopirox	10
tioconazole	10
naftifine	10
itraconazole	10
sertaconazole	10
sulconazole	10
butoconazole	10
terconazole	10
butenafine	10
oxiconazole	10
posaconazole	10
voriconazole	10
anidulafungin	10
caspofungin	10
luliconazole	10
micafungin	10
efinaconazole	10
tavaborole	10
ipratropium	11
albuterol	11
pyrilamine	11
chlorpheniramine	11
cromolyn sodium	11
naphazoline	11
tripelennamine	11
beclomethasone	11
clemastine	11
triprolidine	11
terbutaline	11
brompheniramine	11
pheniramine	11
ketotifen	11
methacholine chloride	11
budesonide	11
nedocromil	11
cetirizine	11
loratadine	11
azelastine	11
flunisolide	11
zileuton	11
zafirlukast	11
levocabastine	11
salmeterol xinafoate	11
formoterol fumarate	11
epinastine	11
olopatadine hydrochloride	11
acrivastine	11
dexchlorpheniramine	11
fluticasone	11
mometasone furoate	11
pseudoephedrine	11
azatadine	11
emedastine	11
desloratadine	11
montelukast	11
fexofenadine	11
tiotropium bromide	11
ciclesonide	11
roflumilast	11
omalizumab	11
levocetirizine	11
indacaterol	11
vilanterol	11
isocarboxazid	12
glutethimide	12
trifluoperazine	12
prochlorperazine	12
diphenhydramine	12
promethazine	12
meprobamate	12
thiothixene	12
thioridazine	12
fluphenazine	12
metoclopramide	12
perphenazine	12
mesoridazine	12
promazine	12
chlorprothixene	12
procyclidine	12
phenmetrazine	12
triflupromazine	12
secobarbital	12
orphenadrine	12
trihexyphenidyl	12
hydroxyzine	12
benztropine	12
loxapine	12
cyclizine	12
molindone	12
biperiden	12
dimenhydrinate	12
trimeprazine	12
thiethylperazine	12
phenylpropanolamine	13
flavoxate	13
terazosin	13
doxazosin	13
finasteride	13
trospium chloride	13
oxybutynin	13
tamsulosin	13
alfuzosin	13
silodosin	13
tolterodine tartrate	13
darifenacin	13
dutasteride	13
tadalafil	13
solifenacin succinate	13
mirabegron	13
fesoterodine	13
nitrofurazone	14
chloramphenicol	14
penicillin g benzathine	14
rifampin	14
streptomycin	14
nalidixic acid	14
nitrofurantoin	14
cycloserine	14
tetracycline	14
spectinomycin	14
doxycycline	14
isoniazid	14
paromomycin	14
oxytetracycline	14
chlortetracycline	14
novobiocin	14
sulfadiazine	14
neomycin	14
cephapirin	14
tinidazole	14
metronidazole	14
pyrazinamide	14
gentian violet	14
penicillin g procaine	14
cephaloglycin	14
bacitracin	14
ethambutol	14
methacycline	14
sulfisoxazole	14
silver sulfadiazine	14
cyclacillin	14
ethionamide	14
demeclocycline	14
minocycline	14
povidone-iodine	14
sulfamethizole	14
cinoxacin	14
capreomycin	14
viomycin	14
clofazimine	14
furazolidone	14
bacampicillin	14
ceforanide	14
enoxacin	14
azithromycin	14
norfloxacin	14
cefpodoxime	14
ceftibuten	14
cefprozil	14
cefdinir	14
clarithromycin	14
mupirocin	14
rifapentine	14
lomefloxacin	14
sparfloxacin	14
dirithromycin	14
grepafloxacin	14
sulfanilamide	14
rifaximin	14
gatifloxacin	14
loracarbef	14
cefpiramide	14
cefonicid	14
cefditoren	14
fidaxomicin	14
trovafloxacin	14
doripenem	14
oritavancin	14
gemifloxacin	14
telithromycin	14
quinupristin	14
dalfopristin	14
dalbavancin	14
delafloxacin	14
telavancin	14
bedaquiline	14
retapamulin	14
ceftolozane	14
ceftaroline fosamil	14
besifloxacin	14
avibactam	14
finafloxacin	14
omadacycline	14
cefiderocol	14
chlorpropamide	15
glipizide	15
metformin	15
tolazamide	15
exenatide	15
acarbose	15
pioglitazone	15
miglitol	15
glimepiride	15
repaglinide	15
nateglinide	15
pramlintide	15
liraglutide	15
lixisenatide	15
sitagliptin phosphate	15
saxagliptin	15
alogliptin	15
linagliptin	15
dulaglutide	15
canagliflozin	15
empagliflozin	15
semaglutide	15
spironolactone	16
hydrochlorothiazide	16
hydralazine	16
atenolol	16
saralasin	16
chlorthalidone	16
indapamide	16
captopril	16
benazepril	16
amlodipine	16
lisinopril	16
perindopril	16
enalapril	16
losartan	16
bisoprolol	16
felodipine	16
icatibant	16
enalaprilat	16
ramipril	16
fosinopril	16
quinapril	16
eprosartan	16
carvedilol	16
trandolapril	16
nebivolol	16
candesartan	16
valsartan	16
irbesartan	16
telmisartan	16
eplerenone	16
olmesartan	16
aliskiren	16
testosterone	17
estradiol	17
menotropins	17
mestranol	17
megestrol	17
progesterone	17
methyltestosterone	17
diethylstilbestrol	17
clomiphene	17
estrone	17
ethinyl estradiol	17
norgestrel	17
norethindrone	17
aminoglutethimide	17
bromocriptine	17
nandrolone	17
quinestrol	17
dydrogesterone	17
danazol	17
medroxyprogesterone	17
norethynodrel	17
fluoxymesterone	17
flutamide	17
testolactone	17
levonorgestrel	17
desogestrel	17
goserelin	17
mifepristone	17
triptorelin pamoate	17
leuprolide	17
nafarelin	17
dienogest	17
etonogestrel	17
cetrorelix	17
norgestimate	17
raloxifene hydrochloride	17
toremifene	17
ganirelix	17
letrozole	17
drospirenone	17
anastrozole	17
penicillin v	18
trimethoprim	18
ampicillin	18
amoxicillin	18
kanamycin	18
carbenicillin	18
lincomycin	18
methicillin	18
ticarcillin	18
tobramycin	18
cloxacillin	18
oxacillin	18
erythromycin	18
cephradine	18
cephalexin	18
cephalothin	18
nafcillin	18
cefazolin	18
sulfamethoxazole	18
vancomycin	18
clindamycin	18
dicloxacillin	18
amikacin	18
fosfomycin	18
amdinocillin	18
cefoxitin	18
cefamandole	18
cefuroxime	18
cefaclor	18
colistin	18
netilmicin	18
piperacillin	18
azlocillin	18
mezlocillin	18
cefotiam	18
cefoperazone	18
cefotaxime	18
ceftazidime	18
ciprofloxacin	18
ceftizoxime	18
aztreonam	18
imipenem	18
cilastatin	18
meropenem	18
ofloxacin	18
sulbactam	18
ceftriaxone	18
cefixime	18
cefotetan	18
cefmetazole	18
tazobactam	18
daptomycin	18
cefmenoxime	18
cefepime	18
moxalactam	18
levofloxacin	18
linezolid	18
moxifloxacin	18
tigecycline	18
ertapenem	18
dopamine	19
chlordiazepoxide	19
amphetamine	19
apomorphine	19
chlorpromazine	19
nicotine	19
dextroamphetamine	19
reserpine	19
scopolamine	19
cocaine	19
imipramine	19
diazepam	19
methysergide	19
dronabinol	19
cyproheptadine	19
mazindol	19
levodopa	19
clonidine	19
haloperidol	19
desipramine	19
amitriptyline	19
pargyline	19
doxepin	19
pimozide	19
amantadine	19
methamphetamine	19
carbidopa	19
mecamylamine	19
clozapine	19
tranylcypromine	19
nortriptyline	19
phenelzine	19
fenfluramine	19
maprotiline	19
clomipramine	19
methylphenidate	19
tetrabenazine	19
trazodone	19
trimipramine	19
amoxapine	19
selegiline	19
fluoxetine	19
amisulpride	19
lithium carbonate	19
memantine	19
citalopram	19
pergolide	19
sertraline	19
risperidone	19
fluvoxamine	19
paliperidone palmitate	19
paroxetine	19
alprazolam	19
buspirone	19
bupropion	19
nefazodone	19
milnacipran	19
modafinil	19
quetiapine fumarate	19
pramipexole	19
olanzapine	19
venlafaxine hydrochloride	19
donepezil	19
atomoxetine hydrochloride	19
ropinirole	19
mirtazapine	19
duloxetine hydrochloride	19
ziprasidone	19
aripiprazole	19
lurasidone hydrochloride	19
levobunolol	20
echothiophate iodide	20
cyclopentolate	20
timolol	20
metipranolol	20
betaxolol	20
carteolol	20
tropicamide	20
propoxycaine	20
fluorometholone	20
brimonidine tartrate	20
dipivefrin	20
apraclonidine	20
dapiprazole	20
latanoprost	20
benoxinate	20
loteprednol etabonate	20
homatropine	20
dorzolamide	20
bromfenac	20
rimexolone	20
difluprednate	20
brinzolamide	20
nepafenac	20
bimatoprost	20
travoprost	20
tafluprost	20
oxazepam	21
lorazepam	21
phenytoin	21
primidone	21
carbamazepine	21
ethosuximide	21
valproic acid	21
trimethadione	21
cannabidiol	21
flurazepam	21
clonazepam	21
baclofen	21
clorazepate dipotassium	21
sodium oxybate	21
temazepam	21
estazolam	21
triazolam	21
vigabatrin	21
clobazam	21
stiripentol	21
methsuximide	21
rufinamide	21
flumazenil	21
zonisamide	21
zolpidem	21
tiagabine	21
gabapentin	21
lamotrigine	21
felbamate	21
quazepam	21
oxcarbazepine	21
levetiracetam	21
fosphenytoin	21
topiramate	21
ezogabine	21
zaleplon	21
pregabalin	21
lacosamide	21
brivaracetam	21
perampanel	21
malathion	22
pentagastrin	22
mephenytoin	22
diphenoxylate	22
disulfiram	22
propantheline	22
droxidopa	22
oxymetazoline	22
methimazole	22
sulfapyridine	22
mafenide	22
barium sulfate	22
metyrapone	22
sulfacetamide	22
oxyphenonium	22
ritodrine	22
benzphetamine	22
piperazine	22
chlorphentermine	22
phentermine	22
antazoline	22
clioquinol	22
mitotane	22
ethchlorvynol	22
guaifenesin	22
deslanoside	22
diatrizoate	22
methenamine	22
sulfamerazine	22
diethylpropion	22
dibucaine	22
etidocaine	22
propylthiouracil	22
indocyanine green	22
thiabendazole	22
candicidin	22
diethylcarbamazine	22
hexachlorophene	22
metrizoic acid	22
metrizamide	22
protriptyline	22
tiopronin	22
ethoxzolamide	22
pemoline	22
piperonyl butoxide	22
aminosalicylic acid	22
dimercaprol	22
isoetharine	22
propiolactone	22
pyridostigmine bromide	22
dienestrol	22
cosyntropin	22
betazole	22
methylergonovine	22
chlormerodrin	22
sulfaphenazole	22
oxymetholone	22
methazolamide	22
meclizine	22
fludrocortisone	22
oxamniquine	22
iopanoic acid	22
niclosamide	22
iodipamide	22
dantrolene	22
mebendazole	22
acetohexamide	22
galantamine	22
iodamide	22
meglumine	22
oxandrolone	22
simethicone	22
prazepam	22
troleandomycin	22
trifluridine	22
calcium gluconate	22
ethylestrenol	22
viloxazine	22
chlorotrianisene	22
sulindac	22
potassium iodide	22
methoxsalen	22
chlormezanone	22
praziquantel	22
phensuximide	22
sucralfate	22
permethrin	22
ranitidine	22
plicamycin	22
chymopapain	22
midodrine	22
iophendylate	22
stanozolol	22
ipodate	22
iothalamate meglumine	22
isosorbide	22
trioxsalen	22
menthol	22
chlorphenesin	22
nifurtimox	22
hydroxocobalamin	22
dichlorphenamide	22
succimer	22
ethiodized oil	22
propyliodone	22
pyrithione	22
manganese chloride	22
bisacodyl	22
tacrine	22
trientine	22
sodium tetradecyl sulfate	22
carboprost	22
estetrol	22
sulfameter	22
tyropanoate	22
chlorzoxazone	22
haloprogin	22
dicyclomine	22
ambenonium chloride	22
rimantadine	22
estropipate	22
teriparatide	22
trilostane	22
selenious acid	22
lutetium	22
doxylamine	22
bentiromide	22
phenazopyridine	22
oxyphencyclimine	22
hetacillin	22
bismuth subsalicylate	22
medrysone	22
zinc sulfate	22
methocarbamol	22
dyphylline	22
albendazole	22
iopamidol	22
ivermectin	22
clidinium	22
tizanidine	22
metocurine	22
pirbuterol	22
polidocanol	22
hydroxystilbamidine	22
pipobroman	22
miltefosine	22
octreotide	22
omeprazole	22
eflornithine	22
cisapride	22
rifabutin	22
cyclothiazide	22
iohexol	22
pralidoxime	22
nilutamide	22
famotidine	22
amifampridine	22
misoprostol	22
cabergoline	22
nizatidine	22
dyclonine	22
perflubron	22
iofetamine	22
auranofin	22
pamidronate	22
magnesium carbonate	22
diphemanil methylsulfate	22
ferric ammonium citrate	22
deflazacort	22
sodium thiosulfate	22
chromic chloride	22
ioversol	22
iopromide	22
entacapone	22
poractant alfa	22
triclofos	22
olsalazine	22
lansoprazole	22
rabeprazole	22
granisetron	22
pantoprazole	22
ferumoxides	22
ferric citrate	22
chloroprocaine	22
fomepizole	22
nalmefene	22
sermorelin	22
mequinol	22
gallium nitrate	22
nabilone	22
alendronate	22
penciclovir	22
potassium perchlorate	22
defibrotide	22
triclabendazole	22
deferiprone	22
pemirolast	22
trimetrexate	22
lanreotide	22
imciromab pentetate	22
colfosceril palmitate	22
beractant	22
ferrous fumarate	22
bethanechol	22
rotigotine	22
lactitol	22
balsalazide	22
acamprosate	22
riluzole	22
doxacurium	22
sibutramine	22
pramoxine	22
lofexidine	22
tetrahydrozoline	22
gadoteridol	22
nitisinone	22
benzquinamide	22
carbinoxamine	22
ferric maltol	22
potassium sulfate	22
secnidazole	22
amlexanox	22
crotamiton	22
perflutren	22
cevimeline	22
tolcapone	22
cetyl alcohol	22
miglustat	22
gadodiamide	22
iodixanol	22
monobenzone	22
decamethonium	22
dolasetron	22
anagrelide	22
ingenol	22
iotrolan	22
bitolterol	22
methyl salicylate	22
pancrelipase	22
cyclobenzaprine	22
manganese sulfate	22
edaravone	22
benzyl benzoate	22
guanadrel	22
acetohydroxamic acid	22
oxybenzone	22
perflexane	22
histrelin	22
invert sugar	22
difenoxin	22
avobenzone	22
lithium citrate	22
docosanol	22
tafenoquine	22
magnesium trisilicate	22
trimethobenzamide	22
arbutamine	22
valrubicin	22
halazepam	22
benzonatate	22
oxaprozin	22
dromostanolone	22
sodium lactate	22
ioxilan	22
menadiol	22
diphenidol	22
meclocycline	22
asenapine	22
pyrvinium	22
gadoterate meglumine	22
zinc acetate	22
rivastigmine	22
pegademase bovine	22
anileridine	22
butalbital	22
chloroxine	22
meprednisone	22
phendimetrazine	22
lodoxamide tromethamine	22
tridihexethyl	22
bromodiphenhydramine	22
polyestradiol	22
norelgestromin	22
ethynodiol	22
indecainide	22
diphenylpyraline	22
levoleucovorin	22
dexbrompheniramine	22
hexocyclium	22
sulfoxone	22
rasagiline	22
cycrimine	22
potassium citrate	22
hexafluorenium	22
demecarium	22
methdilazine	22
methixene	22
pegloticase	22
ethinamate	22
phenacemide	22
quinethazone	22
nitazoxanide	22
buclizine	22
anisindione	22
paramethadione	22
lapyrium	22
hexylcaine	22
acetophenazine	22
zanamivir	22
migalastat	22
pirfenidone	22
verteporfin	22
ferumoxsil	22
iloperidone	22
gadobutrol	22
bexarotene	22
ulipristal	22
rapacuronium	22
desvenlafaxine succinate	22
aldesleukin	22
imiglucerase	22
febuxostat	22
safinamide	22
ardeparin	22
alosetron	22
rizatriptan	22
palonosetron	22
metharbital	22
zolmitriptan	22
octocrylene	22
iocetamic acid	22
paricalcitol	22
metaxalone	22
flibanserin	22
fomivirsen	22
epoetin alfa	22
methantheline	22
rescinnamine	22
capromab pendetide	22
bentoquatam	22
alitretinoin	22
potassium acetate	22
isopropamide iodide	22
sevelamer	22
oseltamivir	22
conivaptan	22
tegaserod	22
icodextrin	22
vilazodone hydrochloride	22
propiomazine	22
naratriptan	22
alatrofloxacin	22
frovatriptan	22
bepotastine	22
gadofosveset trisodium	22
palivizumab	22
istradefylline	22
gadoversetamide	22
sodium benzoate	22
aprepitant	22
eletriptan	22
tolvaptan	22
calfactant	22
fluciclovine f-18	22
ospemifene	22
prucalopride	22
lanthanum carbonate	22
pegvisomant	22
calcium acetate	22
ethotoin	22
almotriptan	22
esomeprazole	22
propoxyphene napsylate	22
spinosad	22
peramivir	22
methyprylon	22
deferasirox	22
alvimopan	22
metreleptin	22
darbepoetin alfa	22
treprostinil	22
abarelix	22
peginterferon beta-1a	22
regadenoson	22
mepolizumab	22
bazedoxifene	22
estrogens, conjugated synthetic a	22
cinacalcet	22
rasburicase	22
pasireotide	22
dexmethylphenidate hydrochloride	22
agalsidase beta	22
dexlansoprazole	22
obeticholic acid	22
ambrisentan	22
macimorelin	22
fospropofol	22
tasimelteon	22
bremelanotide	22
deserpidine	22
protokylol	22
piperacetazine	22
talbutal	22
levopropoxyphene	22
tesamorelin	22
voclosporin	22
romiplostim	22
denosumab	22
ramelteon	22
teduglutide	22
pegaptanib	22
obiltoxaximab	22
ranibizumab	22
lucinactant	22
lubiprostone	22
varenicline	22
incobotulinumtoxina	22
siltuximab	22
lorcaserin	22
urofollitropin	22
netupitant	22
pimavanserin	22
galsulfase	22
ecallantide	22
lisdexamfetamine dimesylate	22
reslizumab	22
ioflupane	22
eltrombopag	22
idursulfase	22
azilsartan	22
eliglustat	22
fosaprepitant	22
fostamatinib	22
selexipag	22
remimazolam	22
ferric carboxymaltose	22
linaclotide	22
eszopiclone	22
carglumic acid	22
cariprazine	22
rucaparib	22
rilonacept	22
aflibercept	22
triheptanoin	22
macitentan	22
elagolix	22
crofelemer	22
afamelanotide	22
aclidinium bromide	22
riociguat	22
levamlodipine	22
raxibacumab	22
flutemetamol	22
ivacaftor	22
lumacaftor	22
eteplirsen	22
tafamidis	22
florbetapir	22
niraparib	22
abobotulinumtoxina	22
olodaterol	22
opicapone	22
lifitegrast	22
ponesimod	22
suvorexant	22
avanafil	22
tivozanib	22
estrogens, conjugated synthetic b	22
vortioxetine	22
patiromer	22
taliglucerase alfa	22
alcaftadine	22
peginesatide	22
relugolix	22
eslicarbazepine	22
levomefolate calcium	22
dornase alfa	22
interferon alfa-n3	22
benralizumab	22
apalutamide	22
asfotase alfa	22
interferon gamma-1b	22
eluxadoline	22
plecanatide	22
dexrazoxane	22
telotristat	22
talazoparib	22
ribociclib	22
ozenoxacin	22
vericiguat	22
naloxegol	22
sarilumab	22
levalbuterol	22
doravirine	22
olaratumab	22
lesinurad	22
tipiracil	22
tenapanor	22
velpatasvir	22
sucroferric oxyhydroxide	22
nusinersen	22
bezlotoxumab	22
brexpiprazole	22
baricitinib	22
darolutamide	22
encorafenib	22
abaloparatide	22
valbenazine	22
sebelipase alfa	22
entrectinib	22
gilteritinib	22
patisiran	22
capmatinib	22
ozanimod	22
emicizumab	22
acalabrutinib	22
lusutrombopag	22
mecasermin	22
thonzonium bromide	22
voxilaprevir	22
ubrogepant	22
deutetrabenazine	22
bictegravir	22
pibrentasvir	22
brexanolone	22
naldemedine	22
cerliponase alfa	22
vaborbactam	22
voxelotor	22
ivosidenib	22
baloxavir	22
methoxyflurane	23
enflurane	23
isoflurane	23
halothane	23
lidocaine	23
gallamine triethiodide	23
pentobarbital	23
glycopyrrolate	23
ketamine	23
droperidol	23
tubocurarine	23
pancuronium	23
neostigmine	23
doxapram	23
meperidine	23
thiopental	23
succinylcholine	23
fentanyl	23
edrophonium	23
bupivacaine	23
methohexital	23
etomidate	23
thiamylal	23
sufentanil	23
midazolam	23
propofol	23
atracurium	23
sevoflurane	23
alfentanil	23
desflurane	23
mivacurium	23
pipecuronium	23
rocuronium	23
vecuronium bromide	23
remifentanil	23
cisatracurium	23
dexmedetomidine	23
sugammadex	23
tranexamic acid	24
warfarin	24
aspirin	24
vitamin k	24
sulfinpyrazone	24
phenprocoumon	24
aminocaproic acid	24
phenindione	24
ticlopidine	24
danaparoid	24
cilostazol	24
bivalirudin	24
reteplase	24
desirudin	24
clopidogrel	24
argatroban	24
tirofiban	24
enoxaparin	24
dalteparin	24
eptifibatide	24
abciximab	24
tinzaparin	24
cangrelor	24
tenecteplase	24
prasugrel hydrochloride	24
fondaparinux	24
dabigatran	24
rivaroxaban	24
ticagrelor	24
apixaban	24
vorapaxar	24
edoxaban	24
betrixaban	24
idarucizumab	24
procaine	25
glutathione	25
tyrosine	25
urea	25
cortisone	25
methylene blue	25
arginine	25
sodium chloride	25
potassium chloride	25
calcium	25
deoxycholic acid	25
cellulose	25
caffeine	25
theophylline	25
glucagon	25
histamine	25
glycine	25
dactinomycin	25
hydrocortisone	25
cysteine	25
insulin	25
oxytocin	25
glycerol	25
acetazolamide	25
ascorbic acid	25
folic acid	25
uridine	25
xylose	25
calcium carbonate	25
pyridoxine	25
dexamethasone	25
dimethyl sulfoxide	25
mannitol	25
isoflurophate	25
lipase	25
ammonium chloride	25
secretin	25
choline	25
adenosine	25
calcium chloride	25
tromethamine	25
heparin	25
penicillamine	25
carbachol	25
fibrinolysin	25
riboflavin	25
parathyroid hormone	25
iodine	25
pilocarpine	25
indomethacin	25
vitamin a	25
quinine	25
cysteamine	25
colchicine	25
biotin	25
sorbitol	25
lanthanum	25
thiamine	25
aluminum	25
calcitonin	25
probenecid	25
silver	25
tetracaine	25
thyrotropin	25
magnesium oxide	25
ethacrynic acid	25
lactulose	25
mersalyl	25
uracil	25
aprotinin	25
chlorhexidine	25
tolbutamide	25
amiloride	25
ceruletide	25
inulin	25
allopurinol	25
polytetrafluoroethylene	25
tretinoin	25
streptozocin	25
bumetanide	25
deferoxamine	25
betaine	25
pantothenic acid	25
acetylcysteine	25
vitamin e	25
sodium fluoride	25
pyrethrins	25
magnesium hydroxide	25
trypan blue	25
evans blue	25
cimetidine	25
pentoxifylline	25
cholecalciferol	25
zinc oxide	25
sodium nitrite	25
capsaicin	25
beta carotene	25
sodium bicarbonate	25
dinoprostone	25
alprostadil	25
dicumarol	25
gramicidin	25
selenomethionine	25
magnesium chloride	25
dinoprost	25
citric acid	25
triclosan	25
lactic acid	25
guanidine	25
calcitriol	25
calcifediol	25
benzyl alcohol	25
sincalide	25
sodium acetate	25
zinc chloride	25
ferrous sulfate	25
sodium phosphate	25
cholic acid	25
sapropterin	25
masoprocol	25
fluorescein	25
soybean oil	25
hydroquinone	25
olive oil	25
sodium carbonate	25
tartaric acid	25
phosphoric acid	25
becaplermin	25
ethanolamine	25
sodium sulfate	25
titanium dioxide	25
cupric chloride	25
alpha-tocopherol	25
sodium citrate	25
polyethylene	25
